# Supplementary material for: Inhibitory effect of carvedilol on bedaquiline metabolism in vitro and in vivo
Source: PeerJ journal article supplement (doi:10.7717/peerj.19313), 2025-04-30
Supplement: Data.zip [file Fig.2A.xlsx]

## Sheet: Sheet1
Quantify Compound Summary Report
Printed Fri May 06 06:12:45 2022
Compound 1: Diazepam
	Name	Sample Text	RT	Area	IS Area	Std. Conc	Conc.	%Dev	S/N	Acq.Date	Acq.Time	Vial	Response
1	bedaq-20220505-S1		1.46	71442		1	0.891	-10.9	13879	2022-05-05	18:27:39	1:A,1	71441.6
2	bedaq-20220505-S2		1.46	72140		1	0.9	-10	13760	2022-05-05	18:30:12	1:A,2	72140.4
3	bedaq-20220505-S3		1.46	77223		1	0.963	-3.7	8958	2022-05-05	18:32:46	1:A,3	77223.3
4	bedaq-20220505-S4		1.46	99828		1	1.245	24.5	12999	2022-05-05	18:35:19	1:A,4	99828.1
5	bedaq-20220505-meoh-3		1.46	193		1	0.002	-99.8	45	2022-05-05	18:37:53	1:F,8	192.535
6	bedaq-20220505-meoh-4		1.46	160		1	0.002	-99.8	26	2022-05-05	18:40:27	1:F,8	160.265
7	bedaq-20220505-A1		1.46	61064		1	0.762	-23.8	12217	2022-05-05	18:43:00	1:A,5	61063.9
8	bedaq-20220505-A2		1.46	59693		1	0.745	-25.5	10437	2022-05-05	18:45:34	1:A,6	59692.9
9	bedaq-20220505-A3		1.46	59312		1	0.74	-26	10314	2022-05-05	18:48:07	1:A,7	59311.7
10	bedaq-20220505-A4		1.46	61098		1	0.762	-23.8	5859	2022-05-05	18:50:41	1:A,8	61097.6
11	bedaq-20220505-A5		1.46	61293		1	0.765	-23.5	6255	2022-05-05	18:53:17	1:B,1	61293.2
12	bedaq-20220505-A6		1.46	60133		1	0.75	-25	10132	2022-05-05	18:55:49	1:B,2	60133
13	bedaq-20220505-A7		1.46	60579		1	0.756	-24.4	14551	2022-05-05	18:58:22	1:B,3	60579.4
14	bedaq-20220505-A8		1.46	60653		1	0.757	-24.3	6624	2022-05-05	19:00:56	1:B,4	60652.6
15	bedaq-20220505-A9		1.46	57255		1	0.714	-28.6	10033	2022-05-05	19:03:29	1:B,5	57255.4
16	bedaq-20220505-A10		1.46	57205		1	0.714	-28.6	11749	2022-05-05	19:06:03	1:B,6	57205.3
17	bedaq-20220505-A11		1.46	54187		1	0.676	-32.4	5529	2022-05-05	19:08:36	1:B,7	54186.9
18	bedaq-20220505-A12		1.46	53322		1	0.665	-33.5	7564	2022-05-05	19:11:10	1:B,8	53322.1
19	bedaq-20220505-A13		1.46	49476		1	0.617	-38.3	8433	2022-05-05	19:13:43	1:C,1	49475.5
20	bedaq-20220505-A14		1.46	50777		1	0.633	-36.7	9026	2022-05-05	19:16:17	1:C,2	50776.7
21	bedaq-20220505-A15		1.46	45036		1	0.562	-43.8	4817	2022-05-05	19:18:51	1:C,3	45036.1
22	bedaq-20220505-A16		1.46	44325		1	0.553	-44.7	7817	2022-05-05	19:21:24	1:C,4	44325.2
Compound 2: M2
	Name	Sample Text	RT	Area	IS Area	Std. Conc	Conc.	%Dev	S/N	Acq.Date	Acq.Time	Vial	Response
1	bedaq-20220505-S1		1.41	48551	71441.6	0.01	0.009	-10.6	14598	2022-05-05	18:27:39	1:A,1	0.68
2	bedaq-20220505-S2		1.41	484195	72140.4	0.1	0.112	11.6	214161	2022-05-05	18:30:12	1:A,2	6.712
3	bedaq-20220505-S3		1.41	4500093	77223.3	1	0.989	-1.1	1431595	2022-05-05	18:32:46	1:A,3	58.274
4	bedaq-20220505-S4		1.41	7912501	99828.1	10	1.347	-86.5	1471597	2022-05-05	18:35:19	1:A,4	79.261															Vmax	0.1133
5	bedaq-20220505-meoh-3		1.41	53846	192.535		4.758		3743	2022-05-05	18:37:53	1:F,8	279.666															Km	10.48
6	bedaq-20220505-meoh-4		1.41	17823	160.265		1.891		2228	2022-05-05	18:40:27	1:F,8	111.21															Ki	39.31
7	bedaq-20220505-A1		1.41	373374	61063.9		0.101		46197	2022-05-05	18:43:00	1:A,5	6.114
8	bedaq-20220505-A2		1.41	333329	59692.9		0.092		50949	2022-05-05	18:45:34	1:A,6	5.584
9	bedaq-20220505-A3		1.41	1112793	59311.7		0.317		200979	2022-05-05	18:48:07	1:A,7	18.762
10	bedaq-20220505-A4		1.41	1119114	61097.6		0.309		217773	2022-05-05	18:50:41	1:A,8	18.317
11	bedaq-20220505-A5		1.41	1611672	61293.2		0.445		187857	2022-05-05	18:53:17	1:B,1	26.294
12	bedaq-20220505-A6		1.41	1609588	60133		0.453		414156	2022-05-05	18:55:49	1:B,2	26.767
13	bedaq-20220505-A7		1.41	1795256	60579.4		0.502		195551	2022-05-05	18:58:22	1:B,3	29.635
14	bedaq-20220505-A8		1.41	1812999	60652.6		0.506		305194	2022-05-05	19:00:56	1:B,4	29.892
15	bedaq-20220505-A9		1.41	1395424	57255.4		0.412		351073	2022-05-05	19:03:29	1:B,5	24.372
16	bedaq-20220505-A10		1.41	1352961	57205.3		0.4		84107	2022-05-05	19:06:03	1:B,6	23.651
17	bedaq-20220505-A11		1.4	928205	54186.9		0.289		191878	2022-05-05	19:08:36	1:B,7	17.13
18	bedaq-20220505-A12		1.4	1036563	53322.1		0.328		169208	2022-05-05	19:11:10	1:B,8	19.44
19	bedaq-20220505-A13		1.4	548534	49475.5		0.186		92262	2022-05-05	19:13:43	1:C,1	11.087
20	bedaq-20220505-A14		1.4	542986	50776.7		0.179		73028	2022-05-05	19:16:17	1:C,2	10.694
21	bedaq-20220505-A15		1.39	219171	45036.1		0.08		42543	2022-05-05	19:18:51	1:C,3	4.867
22	bedaq-20220505-A16		1.39	211099	44325.2		0.078		56442	2022-05-05	19:21:24	1:C,4	4.763
