# Supplementary material for: Inhibitory effect of carvedilol on bedaquiline metabolism in vitro and in vivo
Source: PeerJ journal article supplement (doi:10.7717/peerj.19313), 2025-04-30
Supplement: Data.zip [file Fig.2B-C.xlsx]

## Sheet: Sheet1
Quantify Compound Summary Report
Printed Sat Jul 09 16:59:03 2022
Compound 1: Diazepam
	Name	Sample Text	RT	Area	IS Area	Type	Std. Conc	Conc.	%Dev	S/N	Acq.Date	Acq.Time	Vial	Response
1	bedaq-20220707-Meoh-1						1				2022-07-07	20:13:21	1:F,8
2	bedaq-20220707-Meoh-2		1.41	160			1			20	2022-07-07	21:53:13	1:F,8	160.36
3	bedaq-20220707-A1		1.41	15031			1			1389	2022-07-07	18:32:29	2:A,1	15031
4	bedaq-20220707-A2		1.41	14255			1			1529	2022-07-07	18:34:55	2:A,2	14254.7
5	bedaq-20220707-A3		1.41	13537			1			395	2022-07-07	18:37:23	2:A,3	13537.3
6	bedaq-20220707-A4		1.41	14040			1			1201	2022-07-07	18:39:54	2:A,4	14039.5
7	bedaq-20220707-A5		1.41	10146			1			859	2022-07-07	18:42:21	2:A,5	10145.9
8	bedaq-20220707-A6		1.41	10065			1			1152	2022-07-07	18:44:53	2:A,6	10064.8
9	bedaq-20220707-A7		1.41	14646			1			1126	2022-07-07	18:47:20	2:A,7	14646.4
10	bedaq-20220707-A8		1.41	14290			1			1058	2022-07-07	18:49:50	2:A,8	14289.7
11	bedaq-20220707-A9		1.4	13992			1			1151	2022-07-07	18:52:16	2:B,1	13992.1
12	bedaq-20220707-A10		1.41	14980			1			3619	2022-07-07	18:54:50	2:B,2	14979.6
13	bedaq-20220707-A1-		1.42	22748			1			3169	2022-07-07	21:58:22	2:A,1	22748
14	bedaq-20220707-A2-		1.42	21375			1			2238	2022-07-07	22:00:56	2:A,2	21374.9
15	bedaq-20220707-A11		1.42	22461			1			1573	2022-07-07	22:03:22	2:B,3	22461.3
16	bedaq-20220707-A12		1.42	23362			1			1847	2022-07-07	22:05:50	2:B,4	23361.9
17	bedaq-20220707-A13		1.42	21865			1			1689	2022-07-07	22:08:21	2:B,5	21864.9
18	bedaq-20220707-A14		1.42	21853			1			2320	2022-07-07	22:10:48	2:B,6	21853.2
19	bedaq-20220707-A15		1.42	21427			1			1685	2022-07-07	22:13:20	2:B,7	21426.8
20	bedaq-20220707-A16		1.42	22965			1			2289	2022-07-07	22:15:46	2:B,8	22964.8
21	bedaq-20220707-A17		1.42	21759			1			1895	2022-07-07	22:18:14	2:C,1	21759.1
22	bedaq-20220707-A18		1.42	21267			1			992	2022-07-07	22:20:41	2:C,2	21266.7
23	bedaq-20220707-A19		1.42	21343			1			2469	2022-07-07	22:23:11	2:C,3	21342.8
24	bedaq-20220707-A20		1.42	21751			1			2351	2022-07-07	22:25:37	2:C,4	21750.9
25	bedaq-20220707-A21		1.42	22027			1			2131	2022-07-07	22:28:04	2:C,5	22027.3
26	bedaq-20220707-A22		1.41	22992			1			1277	2022-07-07	22:30:36	2:C,6	22991.9
27	bedaq-20220707-A23		1.41	21191			1			1803	2022-07-07	22:33:02	2:C,7	21190.8
28	bedaq-20220707-A24		1.41	21077			1			5149	2022-07-07	22:35:29	2:C,8	21077
29	bedaq-20220707-A25		1.42	14327			1			1042	2022-07-07	22:37:56	2:D,1	14327.1
30	bedaq-20220707-A26		1.42	14141			1			1786	2022-07-07	22:40:23	2:D,2	14140.6
31	bedaq-20220707-A27		1.42	18984			1			1183	2022-07-07	22:42:53	2:D,3	18984.5
32	bedaq-20220707-A28		1.41	19356			1			2180	2022-07-07	22:45:19	2:D,4	19355.9
33	bedaq-20220707-A29		1.42	20958			1			3578	2022-07-07	22:47:46	2:D,5	20957.8
34	bedaq-20220707-A30		1.41	21488			1			2971	2022-07-07	22:50:18	2:D,6	21488.1
35	bedaq-20220707-A31		1.41	21609			1			1496	2022-07-07	22:52:45	2:D,7	21609.1
36	bedaq-20220707-A32		1.41	19987			1			3044	2022-07-07	22:55:18	2:D,8	19986.5
37	bedaq-20220707-A33		1.42	17996			1			1392	2022-07-07	22:57:43	2:E,1	17995.8
38	bedaq-20220707-A34		1.42	17546			1			1128	2022-07-07	23:00:11	2:E,2	17545.6
39	bedaq-20220707-A35		1.41	20614			1			2654	2022-07-07	23:02:43	2:E,3	20613.7
40	bedaq-20220707-A36		1.42	20760			1			2252	2022-07-07	23:05:10	2:E,4	20759.5
41	bedaq-20220707-water1		1.41	404			1			20	2022-07-09	08:41:12	1:F,8	403.914
42	bedaq-20220707-water2		1.41	33			1			2	2022-07-09	08:43:43	1:F,8	33.372
43	bedaq-20220707-B1		1.41	27468			1			1026	2022-07-09	08:46:09	1:A,1	27468.4
44	bedaq-20220707-B2		1.41	25319			1			1391	2022-07-09	08:48:41	1:A,2	25319.5
45	bedaq-20220707-B3		1.41	28707			1			2364	2022-07-09	08:51:09	1:A,3	28706.5
46	bedaq-20220707-B4		1.42	23191			1			2244	2022-07-09	08:53:41	1:A,4	23191.1
47	bedaq-20220707-B5		1.42	22648			1			2092	2022-07-09	08:56:09	1:A,5	22647.7
48	bedaq-20220707-B6		1.42	24508			1			2888	2022-07-09	08:58:41	1:A,6	24508
49	bedaq-20220707-B7		1.42	24696			1			529	2022-07-09	09:01:08	1:A,7	24695.8
50	bedaq-20220707-B8		1.42	22168			1			2340	2022-07-09	09:03:36	1:A,8	22168
51	bedaq-20220707-B9		1.42	24039			1			3016	2022-07-09	09:06:07	1:B,1	24039.2
52	bedaq-20220707-B10		1.42	21956			1			1821	2022-07-09	09:08:34	1:B,2	21956.3
53	bedaq-20220707-B11		1.41	22260			1			3485	2022-07-09	09:11:06	1:B,3	22260.2
54	bedaq-20220707-B12		1.42	20621			1			5284	2022-07-09	09:13:33	1:B,4	20620.6
55	bedaq-20220707-B13		1.42	21620			1			2732	2022-07-09	09:16:05	1:B,5	21619.6
56	bedaq-20220707-B14		1.42	20243			1			4245	2022-07-09	09:18:32	1:B,6	20243
57	bedaq-20220707-B15		1.41	30436			1			2507	2022-07-09	09:21:04	1:B,7	30435.9
58	bedaq-20220707-B16		1.42	21223			1			2908	2022-07-09	09:23:31	1:B,8	21223.3
59	bedaq-20220707-B17		1.42	21325			1			3354	2022-07-09	09:25:58	1:C,1	21324.9
60	bedaq-20220707-B18		1.42	21239			1			1968	2022-07-09	09:28:29	1:C,2	21239.1
61	bedaq-20220707-B19		1.42	20685			1			3124	2022-07-09	09:30:56	1:C,3	20684.9
62	bedaq-20220707-B20		1.41	23953			1			2814	2022-07-09	09:33:32	1:C,4	23952.9
63	bedaq-20220707-B21		1.41	25089			1			3702	2022-07-09	09:35:59	1:C,5	25088.8
64	bedaq-20220707-B22		1.41	21065			1			2225	2022-07-09	09:38:31	1:C,6	21065.4
65	bedaq-20220707-B23		1.41	20902			1			2200	2022-07-09	09:40:59	1:C,7	20902.4
66	bedaq-20220707-B24		1.41	19788			1			2828	2022-07-09	09:43:31	1:C,8	19788.1
67	bedaq-20220707-B25		1.43	9472			1			712	2022-07-09	09:45:57	1:D,1	9472.24
68	bedaq-20220707-B26		1.42	10194			1			3462	2022-07-09	09:48:24	1:D,2	10194.1
69	bedaq-20220707-B27		1.41	29689			1			3756	2022-07-09	09:50:51	1:D,3	29688.8
70	bedaq-20220707-B28		1.41	21598			1			3208	2022-07-09	09:53:22	1:D,4	21597.6
71	bedaq-20220707-B29		1.41	20428			1			1619	2022-07-09	09:55:49	1:D,5	20428.4
72	bedaq-20220707-B30		1.41	19617			1			2095	2022-07-09	09:58:16	1:D,6	19616.6
73	bedaq-20220707-B31		1.41	21076			1			3205	2022-07-09	10:00:42	1:D,7	21076.5
74	bedaq-20220707-B32		1.41	20743			1			2410	2022-07-09	10:03:13	1:D,8	20742.9
75	bedaq-20220707-B33		1.41	19302			1			2906	2022-07-09	10:05:39	1:E,1	19302.3
76	bedaq-20220707-B34		1.41	19433			1			2065	2022-07-09	10:08:06	1:E,2	19433.3
77	bedaq-20220707-B35		1.41	18233			1			2824	2022-07-09	10:10:37	1:E,3	18233.4
78	bedaq-20220707-B36		1.41	19360			1			1302	2022-07-09	10:13:04	1:E,4	19360
Compound 2: M2
	Name	Sample Text	RT	Area	IS Area	Type	Std. Conc	Conc.	%Dev	S/N	Acq.Date	Acq.Time	Vial	Response
1	bedaq-20220707-Meoh-1										2022-07-07	20:13:21	1:F,8
2	bedaq-20220707-Meoh-2		1.35	376	160.36					37	2022-07-07	21:53:13	1:F,8	2.348
3	bedaq-20220707-A1		1.34	323729	15031					36067	2022-07-07	18:32:29	2:A,1	21.537
4	bedaq-20220707-A2		1.34	314468	14254.7					29779	2022-07-07	18:34:55	2:A,2	22.061
5	bedaq-20220707-A3		1.34	184172	13537.3					17282	2022-07-07	18:37:23	2:A,3	13.605
6	bedaq-20220707-A4		1.34	182078	14039.5					32920	2022-07-07	18:39:54	2:A,4	12.969
7	bedaq-20220707-A5		1.34	245278	10145.9					35326	2022-07-07	18:42:21	2:A,5	24.175
8	bedaq-20220707-A6		1.34	247557	10064.8					27834	2022-07-07	18:44:53	2:A,6	24.596
9	bedaq-20220707-A7		1.34	142311	14646.4					7618	2022-07-07	18:47:20	2:A,7	9.716
10	bedaq-20220707-A8		1.34	142488	14289.7					34157	2022-07-07	18:49:50	2:A,8	9.971
11	bedaq-20220707-A9		1.34	114632	13992.1					15277	2022-07-07	18:52:16	2:B,1	8.193
12	bedaq-20220707-A10		1.34	120155	14979.6					12884	2022-07-07	18:54:50	2:B,2	8.021
13	bedaq-20220707-A1-		1.35	698801	22748					114096	2022-07-07	21:58:22	2:A,1	30.719
14	bedaq-20220707-A2-		1.35	669698	21374.9					68942	2022-07-07	22:00:56	2:A,2	31.331
15	bedaq-20220707-A11		1.34	547455	22461.3					27152	2022-07-07	22:03:22	2:B,3	24.373
16	bedaq-20220707-A12		1.35	577254	23361.9					132692	2022-07-07	22:05:50	2:B,4	24.709
17	bedaq-20220707-A13		1.35	564561	21864.9					53791	2022-07-07	22:08:21	2:B,5	25.82
18	bedaq-20220707-A14		1.35	536378	21853.2					40037	2022-07-07	22:10:48	2:B,6	24.545
19	bedaq-20220707-A15		1.35	29673	21426.8					3540	2022-07-07	22:13:20	2:B,7	1.385
20	bedaq-20220707-A16		1.35	34182	22964.8					2316	2022-07-07	22:15:46	2:B,8	1.488
21	bedaq-20220707-A17		1.34	165027	21759.1					30254	2022-07-07	22:18:14	2:C,1	7.584
22	bedaq-20220707-A18		1.34	158676	21266.7					21663	2022-07-07	22:20:41	2:C,2	7.461
23	bedaq-20220707-A19		1.35	423328	21342.8					53717	2022-07-07	22:23:11	2:C,3	19.835
24	bedaq-20220707-A20		1.34	419628	21750.9					57703	2022-07-07	22:25:37	2:C,4	19.292
25	bedaq-20220707-A21		1.34	657998	22027.3					64207	2022-07-07	22:28:04	2:C,5	29.872
26	bedaq-20220707-A22		1.34	648259	22991.9					60497	2022-07-07	22:30:36	2:C,6	28.195
27	bedaq-20220707-A23		1.34	535332	21190.8					90791	2022-07-07	22:33:02	2:C,7	25.263
28	bedaq-20220707-A24		1.34	524387	21077					89394	2022-07-07	22:35:29	2:C,8	24.88
29	bedaq-20220707-A25		1.34	58225	14327.1					3344	2022-07-07	22:37:56	2:D,1	4.064
30	bedaq-20220707-A26		1.34	58216	14140.6					6178	2022-07-07	22:40:23	2:D,2	4.117
31	bedaq-20220707-A27		1.34	581573	18984.5					65761	2022-07-07	22:42:53	2:D,3	30.634
32	bedaq-20220707-A28		1.34	593162	19355.9					74083	2022-07-07	22:45:19	2:D,4	30.645
33	bedaq-20220707-A29		1.34	7771	20957.8					1080	2022-07-07	22:47:46	2:D,5	0.371
34	bedaq-20220707-A30		1.34	7249	21488.1					966	2022-07-07	22:50:18	2:D,6	0.337
35	bedaq-20220707-A31		1.34	363207	21609.1					72664	2022-07-07	22:52:45	2:D,7	16.808
36	bedaq-20220707-A32		1.34	367400	19986.5					25042	2022-07-07	22:55:18	2:D,8	18.382
37	bedaq-20220707-A33		1.34	376671	17995.8					22434	2022-07-07	22:57:43	2:E,1	20.931
38	bedaq-20220707-A34		1.34	368307	17545.6					52811	2022-07-07	23:00:11	2:E,2	20.991
39	bedaq-20220707-A35		1.34	541189	20613.7					69686	2022-07-07	23:02:43	2:E,3	26.254
40	bedaq-20220707-A36		1.34	539464	20759.5					113304	2022-07-07	23:05:10	2:E,4	25.986
41	bedaq-20220707-water1		1.32	23	403.914					1	2022-07-09	08:41:12	1:F,8	0.056
42	bedaq-20220707-water2		1.3	43	33.372					3	2022-07-09	08:43:43	1:F,8	1.303
43	bedaq-20220707-B1		1.34	416522	27468.4					34604	2022-07-09	08:46:09	1:A,1	15.164
44	bedaq-20220707-B2		1.35	412918	25319.5					39858	2022-07-09	08:48:41	1:A,2	16.308
45	bedaq-20220707-B3		1.34	140658	28706.5					20767	2022-07-09	08:51:09	1:A,3	4.9
46	bedaq-20220707-B4		1.34	132456	23191.1					14103	2022-07-09	08:53:41	1:A,4	5.711
47	bedaq-20220707-B5		1.35	191337	22647.7					18947	2022-07-09	08:56:09	1:A,5	8.448
48	bedaq-20220707-B6		1.35	195721	24508					15224	2022-07-09	08:58:41	1:A,6	7.986
49	bedaq-20220707-B7		1.35	132778	24695.8					13429	2022-07-09	09:01:08	1:A,7	5.377
50	bedaq-20220707-B8		1.35	115860	22168					20477	2022-07-09	09:03:36	1:A,8	5.226
51	bedaq-20220707-B9		1.35	53074	24039.2					15078	2022-07-09	09:06:07	1:B,1	2.208
52	bedaq-20220707-B10		1.35	50032	21956.3					7800	2022-07-09	09:08:34	1:B,2	2.279
53	bedaq-20220707-B11		1.34	306181	22260.2					55785	2022-07-09	09:11:06	1:B,3	13.755
54	bedaq-20220707-B12		1.35	304226	20620.6					26405	2022-07-09	09:13:33	1:B,4	14.754
55	bedaq-20220707-B13		1.35	434995	21619.6					42243	2022-07-09	09:16:05	1:B,5	20.12
56	bedaq-20220707-B14		1.35	242899	20243					37302	2022-07-09	09:18:32	1:B,6	11.999
57	bedaq-20220707-B15		1.35	246411	30435.9					34744	2022-07-09	09:21:04	1:B,7	8.096
58	bedaq-20220707-B16		1.35	198541	21223.3					42113	2022-07-09	09:23:31	1:B,8	9.355
59	bedaq-20220707-B17		1.35	173592	21324.9					25470	2022-07-09	09:25:58	1:C,1	8.14
60	bedaq-20220707-B18		1.35	174310	21239.1					36441	2022-07-09	09:28:29	1:C,2	8.207
61	bedaq-20220707-B19		1.35	156575	20684.9					31465	2022-07-09	09:30:56	1:C,3	7.57
62	bedaq-20220707-B20		1.34	174181	23952.9					30176	2022-07-09	09:33:32	1:C,4	7.272
63	bedaq-20220707-B21		1.34	67514	25088.8					13305	2022-07-09	09:35:59	1:C,5	2.691
64	bedaq-20220707-B22		1.34	57468	21065.4					10833	2022-07-09	09:38:31	1:C,6	2.728
65	bedaq-20220707-B23		1.34	5320	20902.4					660	2022-07-09	09:40:59	1:C,7	0.255
66	bedaq-20220707-B24		1.34	4642	19788.1					959	2022-07-09	09:43:31	1:C,8	0.235
67	bedaq-20220707-B25		1.35	45771	9472.24					7401	2022-07-09	09:45:57	1:D,1	4.832
68	bedaq-20220707-B26		1.34	55666	10194.1					5659	2022-07-09	09:48:24	1:D,2	5.461
69	bedaq-20220707-B27		1.34	84317	29688.8					12505	2022-07-09	09:50:51	1:D,3	2.84
70	bedaq-20220707-B28		1.34	61813	21597.6					10542	2022-07-09	09:53:22	1:D,4	2.862
71	bedaq-20220707-B29		1.34	36723	20428.4					3106	2022-07-09	09:55:49	1:D,5	1.798
72	bedaq-20220707-B30		1.35	33447	19616.6					5431	2022-07-09	09:58:16	1:D,6	1.705
73	bedaq-20220707-B31		1.35	194185	21076.5					17285	2022-07-09	10:00:42	1:D,7	9.213
74	bedaq-20220707-B32		1.35	206408	20742.9					11172	2022-07-09	10:03:13	1:D,8	9.951
75	bedaq-20220707-B33		1.34	69152	19302.3					8607	2022-07-09	10:05:39	1:E,1	3.583
76	bedaq-20220707-B34		1.34	68163	19433.3					13878	2022-07-09	10:08:06	1:E,2	3.508
77	bedaq-20220707-B35		1.34	42404	18233.4					3668	2022-07-09	10:10:37	1:E,3	2.326
78	bedaq-20220707-B36		1.34	39827	19360					8662	2022-07-09	10:13:04	1:E,4	2.057

## Sheet: Inhibitor selection
Drug		Inhibition ratio%	Mean
glimepiride	13.605	62.4111	60.9523
	12.969	59.4936
bosentan	24.175	110.9	111.865
	24.596	112.831
losartan	9.716	44.5709	45.1557
	9.971	45.7406
selexipag	8.193	37.5843	37.1898
	8.021	36.7953
sitagliptin	24.373	78.5592	79.1007
	24.709	79.6422
PF-04971729	25.82	83.2232	81.1684
	24.545	79.1136
quinidine	19.835	63.9323	63.0572
	19.292	62.1821
dabigatran	29.872	96.2836	93.581
	28.195	90.8783
apixaban	25.263	81.4279	80.8106
	24.88	80.1934
cangrelor	30.634	98.7397	98.7575
	30.645	98.7752
warfarin	20.931	67.4649	67.5616
	20.991	67.6583
mexiletine hydrochloride	26.254	84.6221	84.1902
	25.986	83.7583
amiodarone hydrochloride	4.9	31.1388	33.7157
	5.711	36.2926
nifedipine	5.377	34.1701	33.6903
	5.226	33.2105
vericiguat	13.755	87.411	90.5853
	14.754	93.7595
rivaroxaban	20.12	127.86	102.056
	11.999	76.2519
cimetidine	8.096	51.4489	55.4493
	9.355	59.4497
propafenone	8.14	51.7285	51.9414
	8.207	52.1543
verapamil hydrochloride	7.57	48.1063	47.1594
	7.272	46.2125
lovastatin	4.832	30.7067	32.7053
	5.461	34.7039
carvedilol	2.84	18.0478	18.1177
	2.862	18.1876
cariprazine	9.213	58.5473	60.8922
	9.951	63.2372
imipramine hydrochloride	3.583	22.7694	22.5311
	3.508	22.2928
quercetin	4.111	39.932	41.1365
	4.359	42.3409
apigenin	3.726	36.1923	33.1714
	3.104	30.1506
naringenin	3.667	35.6192	36.4352
	3.835	37.2511
daidzein	8.389	81.4862	82.914
	8.683	84.3419
sophocarpine	9.698	94.2011	92.3312
	9.313	90.4614
bergenin	10.478	101.778	100.389
	10.192	98.9995
hesperetin	4.213	40.9228	39.0724
	3.832	37.222
baicalin	6.059	58.8538	59.0044
	6.09	59.1549
resveratrol	2.354	22.8655	23.0695
	2.396	23.2734
rutin	7.888	76.6197	75.0267
	7.56	73.4337
kaempferol	2.352	22.846	22.2729
	2.234	21.6999
betaine	8.341	81.0199	82.0981
	8.563	83.1763
berberine	8.291	80.5342	79.3103
	8.039	78.0864
limonin	5.702	55.3861	56.2943
	5.889	57.2025
andrographolide	2.677	34.5063	32.734
	2.402	30.9616
artemether	4.125	53.1709	55.2204
	4.443	57.2699
sophoridine	8.412	108.43	108.733
	8.459	109.036
piperine	3.316	42.743	42.2403
	3.238	41.7376
chrysin	2.685	34.6094	35.2024
	2.777	35.7953
naringin	9.2	118.587	109.107
	7.729	99.6262
astragalin	5.857	75.4963	75.6767
	5.885	75.8572
daphnoretin	5.639	72.6863	73.9753
	5.839	75.2642
2-(4-Hydroxyphenyl) acetic acid	8.159	105.169	107.302
	8.49	109.435
isorhamnetin	2.883	37.1616	36.182
	2.731	35.2024
silibinin	2.937	37.8577	32.2506
	2.067	26.6435
genistein	2.375	30.6136	27.9582
	1.963	25.3029
lycopene	2.103	27.1075	25.6252
	1.873	24.1428
