# Supplementary material for: Inhibitory effect of carvedilol on bedaquiline metabolism in vitro and in vivo
Source: PeerJ journal article supplement (doi:10.7717/peerj.19313), 2025-04-30
Supplement: Data.zip [file Fig.3A.xlsx]

## Sheet: Sheet1
Quantify Compound Summary Report
Printed Wed Sep 14 22:46:35 2022
Compound 1: Diazepam
	Name	Sample Text	RT	Area	IS Area	Type	Std. Conc	Conc.	%Dev	S/N	Acq.Date	Acq.Time	Vial	Response
1	bedaq-20220914-C1		1.43	27350			1			2474	2022-09-14	18:48:42	1:A,1	27349.7
2	bedaq-20220914-C2		1.43	26875			1			4303	2022-09-14	18:51:08	1:A,2	26875.1
3	bedaq-20220914-C3		1.43	26593			1			3008	2022-09-14	18:53:39	1:A,3	26593.1
4	bedaq-20220914-C4		1.43	25933			1			6959	2022-09-14	18:56:12	1:A,4	25933
5	bedaq-20220914-C5		1.43	25698			1			2376	2022-09-14	18:58:41	1:A,5	25698.1
6	bedaq-20220914-C6		1.43	25140			1			2103	2022-09-14	19:01:13	1:A,6	25140.1
7	bedaq-20220914-C7		1.43	25692			1			3488	2022-09-14	19:03:46	1:A,7	25692.1
8	bedaq-20220914-C8		1.43	25088			1			3675	2022-09-14	19:06:13	1:A,8	25088.2
9	bedaq-20220914-C9		1.43	25372			1			4875	2022-09-14	19:08:40	1:B,1	25371.7
10	bedaq-20220914-C10		1.43	25820			1			2689	2022-09-14	19:11:11	1:B,2	25819.7
11	bedaq-20220914-C11		1.43	26395			1			4855	2022-09-14	19:13:37	1:B,3	26395.1
12	bedaq-20220914-C12		1.43	27122			1			3981	2022-09-14	19:16:09	1:B,4	27122.1
13	bedaq-20220914-C13		1.43	26737			1			6918	2022-09-14	19:18:37	1:B,5	26737
14	bedaq-20220914-C14		1.43	26873			1			6159	2022-09-14	19:21:09	1:B,6	26872.9
15	bedaq-20220914-C15		1.43	28017			1			9343	2022-09-14	19:23:36	1:B,7	28017.3
16	bedaq-20220914-C16		1.43	29920			1			6856	2022-09-14	19:26:08	1:B,8	29920.1
17	bedaq-20220914-C17		1.43	33009			1			4650	2022-09-14	19:28:35	1:C,1	33009.1
18	bedaq-20220914-C18		1.43	32484			1			5340	2022-09-14	19:31:07	1:C,2	32483.9
19	bedaq-20220914-C19		1.43	31992			1			5316	2022-09-14	19:33:34	1:C,3	31991.7
20	bedaq-20220914-C20		1.43	32301			1			6461	2022-09-14	19:36:01	1:C,4	32301.2
21	bedaq-20220914-C21		1.43	33155			1			2088	2022-09-14	19:38:33	1:C,5	33155.3
22	bedaq-20220914-C22		1.43	33168			1			7356	2022-09-14	19:41:00	1:C,6	33167.7
23	bedaq-20220914-C23		1.43	32794			1			4800	2022-09-14	19:43:32	1:C,7	32793.8
24	bedaq-20220914-C24		1.43	32148			1			6618	2022-09-14	19:45:59	1:C,8	32148.2
25	bedaq-20220914-D1		1.43	20371			1			2644	2022-09-14	19:48:31	1:D,1	20371
26	bedaq-20220914-D2		1.43	21222			1			3627	2022-09-14	19:50:59	1:D,2	21222
27	bedaq-20220914-D3		1.43	22541			1			4507	2022-09-14	19:53:31	1:D,3	22540.9
28	bedaq-20220914-D4		1.43	26862			1			2647	2022-09-14	19:55:58	1:D,4	26862.5
29	bedaq-20220914-D5		1.43	27283			1			6212	2022-09-14	19:58:31	1:D,5	27282.9
30	bedaq-20220914-D6		1.43	27069			1			3647	2022-09-14	20:00:57	1:D,6	27068.9
31	bedaq-20220914-D7		1.43	31436			1			4688	2022-09-14	20:03:30	1:D,7	31435.6
32	bedaq-20220914-D8		1.43	30848			1			3652	2022-09-14	20:05:58	1:D,8	30847.6
33	bedaq-20220914-D9		1.43	33752			1			5951	2022-09-14	20:08:29	1:E,1	33752.1
34	bedaq-20220914-D10		1.43	37324			1			7348	2022-09-14	20:10:56	1:E,2	37324
35	bedaq-20220914-D11		1.43	36067			1			7874	2022-09-14	20:13:22	1:E,3	36066.9
36	bedaq-20220914-D12		1.43	33869			1			5523	2022-09-14	20:15:49	1:E,4	33869.2
37	bedaq-20220914-D13		1.43	37227			1			4667	2022-09-14	20:18:21	1:E,5	37227.5
38	bedaq-20220914-D14		1.43	38318			1			6008	2022-09-14	20:20:48	1:E,6	38318.4
39	bedaq-20220914-D15		1.43	37511			1			5276	2022-09-14	20:23:20	1:E,7	37510.7
40	bedaq-20220914-D16		1.43	37544			1			4405	2022-09-14	20:25:47	1:E,8	37544.4
41	bedaq-20220914-D17		1.43	37070			1			5322	2022-09-14	20:28:22	1:F,1	37070
42	bedaq-20220914-D18		1.43	36218			1			7334	2022-09-14	20:30:55	1:F,2	36218
43	bedaq-20220914-D19		1.43	37210			1			8116	2022-09-14	20:33:22	1:F,3	37210.1
44	bedaq-20220914-D20		1.43	37358			1			3346	2022-09-14	20:35:54	1:F,4	37357.6
45	bedaq-20220914-D21		1.43	36939			1			4198	2022-09-14	20:38:20	1:F,5	36939.5
46	bedaq-20220914-D22		1.43	35407			1			8166	2022-09-14	20:40:46	1:F,6	35406.9
47	bedaq-20220914-D23		1.43	36142			1			3450	2022-09-14	20:43:18	1:F,7	36141.7
48	bedaq-20220914-D24		1.43	35754			1			4683	2022-09-14	20:45:44	1:F,1	35754
Compound 2: M2
	Name	Sample Text	RT	Area	IS Area	Type	Std. Conc	Conc.	%Dev	S/N	Acq.Date	Acq.Time	Vial	Response
1	bedaq-20220914-C1		1.39	45569	27349.7		1			6862	2022-09-14	18:48:42	1:A,1	1.666
2	bedaq-20220914-C2		1.39	46670	26875.1		1			15608	2022-09-14	18:51:08	1:A,2	1.737
3	bedaq-20220914-C3		1.39	42376	26593.1		1			6314	2022-09-14	18:53:39	1:A,3	1.593
4	bedaq-20220914-C4		1.39	72443	25933		1			16716	2022-09-14	18:56:12	1:A,4	2.793
5	bedaq-20220914-C5		1.39	78069	25698.1		1			24277	2022-09-14	18:58:41	1:A,5	3.038
6	bedaq-20220914-C6		1.39	83004	25140.1		1			21180	2022-09-14	19:01:13	1:A,6	3.302
7	bedaq-20220914-C7		1.39	131246	25692.1		1			27017	2022-09-14	19:03:46	1:A,7	5.108
8	bedaq-20220914-C8		1.39	131091	25088.2		1			49131	2022-09-14	19:06:13	1:A,8	5.225
9	bedaq-20220914-C9		1.39	141780	25371.7		1			42127	2022-09-14	19:08:40	1:B,1	5.588
10	bedaq-20220914-C10		1.39	206726	25819.7		1			38582	2022-09-14	19:11:11	1:B,2	8.007
11	bedaq-20220914-C11		1.39	205626	26395.1		1			30949	2022-09-14	19:13:37	1:B,3	7.79
12	bedaq-20220914-C12		1.39	209378	27122.1		1			72469	2022-09-14	19:16:09	1:B,4	7.72
13	bedaq-20220914-C13		1.39	309047	26737		1			75440	2022-09-14	19:18:37	1:B,5	11.559
14	bedaq-20220914-C14		1.39	311362	26872.9		1			54905	2022-09-14	19:21:09	1:B,6	11.586
15	bedaq-20220914-C15		1.39	316702	28017.3		1			66713	2022-09-14	19:23:36	1:B,7	11.304
16	bedaq-20220914-C16		1.39	367403	29920.1		1			140944	2022-09-14	19:26:08	1:B,8	12.279
17	bedaq-20220914-C17		1.39	403033	33009.1		1			105544	2022-09-14	19:28:35	1:C,1	12.21
18	bedaq-20220914-C18		1.39	389781	32483.9		1			37057	2022-09-14	19:31:07	1:C,2	11.999
19	bedaq-20220914-C19		1.39	402558	31991.7		1			159857	2022-09-14	19:33:34	1:C,3	12.583
20	bedaq-20220914-C20		1.39	411748	32301.2		1			129733	2022-09-14	19:36:01	1:C,4	12.747
21	bedaq-20220914-C21		1.39	413636	33155.3		1			90421	2022-09-14	19:38:33	1:C,5	12.476
22	bedaq-20220914-C22		1.39	428907	33167.7		1			32133	2022-09-14	19:41:00	1:C,6	12.931
23	bedaq-20220914-C23		1.39	425879	32793.8		1			54473	2022-09-14	19:43:32	1:C,7	12.987
24	bedaq-20220914-C24		1.39	426964	32148.2		1			59991	2022-09-14	19:45:59	1:C,8	13.281
25	bedaq-20220914-D1		1.39	37139	20371		1			6782	2022-09-14	19:48:31	1:D,1	1.823
26	bedaq-20220914-D2		1.38	41296	21222		1			6641	2022-09-14	19:50:59	1:D,2	1.946
27	bedaq-20220914-D3		1.38	42378	22540.9		1			7817	2022-09-14	19:53:31	1:D,3	1.88
28	bedaq-20220914-D4		1.38	65750	26862.5		1			14740	2022-09-14	19:55:58	1:D,4	2.448
29	bedaq-20220914-D5		1.38	68289	27282.9		1			16034	2022-09-14	19:58:31	1:D,5	2.503
30	bedaq-20220914-D6		1.38	68435	27068.9		1			5664	2022-09-14	20:00:57	1:D,6	2.528
31	bedaq-20220914-D7		1.38	104398	31435.6		1			21359	2022-09-14	20:03:30	1:D,7	3.321
32	bedaq-20220914-D8		1.38	108594	30847.6		1			13621	2022-09-14	20:05:58	1:D,8	3.52
33	bedaq-20220914-D9		1.38	115682	33752.1		1			32085	2022-09-14	20:08:29	1:E,1	3.427
34	bedaq-20220914-D10		1.38	333200	37324		1			39280	2022-09-14	20:10:56	1:E,2	8.927
35	bedaq-20220914-D11		1.38	335280	36066.9		1			36364	2022-09-14	20:13:22	1:E,3	9.296
36	bedaq-20220914-D12		1.38	337997	33869.2		1			64745	2022-09-14	20:15:49	1:E,4	9.979
37	bedaq-20220914-D13		1.38	443513	37227.5		1			23243	2022-09-14	20:18:21	1:E,5	11.914
38	bedaq-20220914-D14		1.38	456788	38318.4		1			116293	2022-09-14	20:20:48	1:E,6	11.921
39	bedaq-20220914-D15		1.38	445951	37510.7		1			94233	2022-09-14	20:23:20	1:E,7	11.889
40	bedaq-20220914-D16		1.38	466725	37544.4		1			64121	2022-09-14	20:25:47	1:E,8	12.431
41	bedaq-20220914-D17		1.38	460143	37070		1			118836	2022-09-14	20:28:22	1:F,1	12.413
42	bedaq-20220914-D18		1.38	464460	36218		1			60551	2022-09-14	20:30:55	1:F,2	12.824
43	bedaq-20220914-D19		1.38	466529	37210.1		1			112472	2022-09-14	20:33:22	1:F,3	12.538
44	bedaq-20220914-D20		1.38	456841	37357.6		1			60067	2022-09-14	20:35:54	1:F,4	12.229
45	bedaq-20220914-D21		1.38	473871	36939.5		1			43850	2022-09-14	20:38:20	1:F,5	12.828
46	bedaq-20220914-D22		1.38	472809	35406.9		1			81973	2022-09-14	20:40:46	1:F,6	13.354
47	bedaq-20220914-D23		1.38	475324	36141.7		1			114422	2022-09-14	20:43:18	1:F,7	13.152
48	bedaq-20220914-D24		1.38	471162	35754		1			28562	2022-09-14	20:45:44	1:F,1	13.178
