# Supplementary material for: Inhibitory effect of carvedilol on bedaquiline metabolism in vitro and in vivo
Source: PeerJ journal article supplement (doi:10.7717/peerj.19313), 2025-04-30
Supplement: Data.zip [file Fig.3B.xlsx]

## Sheet: Sheet1
Quantify Compound Summary Report
Printed Sun Dec 11 20:57:23 2022
Compound 1: Diazepam
	Name	Sample Text	RT	Area	IS Area	Type	Std. Conc	Conc.	%Dev	S/N	Acq.Date	Acq.Time	Vial	Response
1	Bedaquiline-20221203-1		1.44	74877			1			5234	2022-12-05	12:28:40	2:A,1	74877.2
2	Bedaquiline-20221203-2		1.44	71068			1			5805	2022-12-05	12:31:07	2:A,2	71067.9
3	Bedaquiline-20221203-3		1.44	82732			1			4553	2022-12-05	12:33:34	2:A,3	82732.5
4	Bedaquiline-20221203-4		1.44	81431			1			6674	2022-12-05	12:36:04	2:A,4	81430.6
5	Bedaquiline-20221203-5		1.44	81342			1			5670	2022-12-05	12:38:31	2:A,5	81341.6
6	Bedaquiline-20221203-6		1.44	77161			1			6129	2022-12-05	12:40:58	2:A,6	77161.4
7	Bedaquiline-20221203-7		1.44	65827			1			5726	2022-12-05	12:43:30	2:A,7	65826.9
8	Bedaquiline-20221203-8		1.44	65410			1			5158	2022-12-05	12:45:57	2:A,8	65409.6
9	Bedaquiline-20221203-9		1.44	52338			1			4136	2022-12-05	12:48:23	2:B,1	52337.9
10	Bedaquiline-20221203-10		1.44	81093			1			5979	2022-12-05	12:50:57	2:B,2	81093.5
11	Bedaquiline-20221203-11		1.44	84810			1			6790	2022-12-05	12:53:24	2:B,3	84810.2
12	Bedaquiline-20221203-12		1.44	75361			1			6234	2022-12-05	12:55:56	2:B,4	75360.5
13	Bedaquiline-20221203-13		1.44	83806			1			5684	2022-12-05	12:58:30	2:B,5	83805.6
14	Bedaquiline-20221203-14		1.44	75426			1			5186	2022-12-05	13:00:56	2:B,6	75425.8
15	Bedaquiline-20221203-15		1.44	70470			1			6305	2022-12-05	13:03:23	2:B,7	70470.4
16	Bedaquiline-20221203-16		1.44	79823			1			6127	2022-12-05	13:05:50	2:B,8	79823.3
17	Bedaquiline-20221203-17		1.44	62435			1			4721	2022-12-05	13:08:20	2:C,1	62434.8
18	Bedaquiline-20221203-18		1.44	85458			1			6161	2022-12-05	13:10:46	2:C,2	85457.7
19	Bedaquiline-20221203-19		1.44	65334			1			6660	2022-12-05	13:13:19	2:C,3	65334.3
20	Bedaquiline-20221203-20		1.44	84482			1			7910	2022-12-05	13:15:47	2:C,4	84482.3
21	Bedaquiline-20221203-21		1.44	78651			1			6249	2022-12-05	13:18:19	2:C,5	78650.8
22	Bedaquiline-20221203-22		1.44	68818			1			6018	2022-12-05	13:20:45	2:C,6	68817.7
23	Bedaquiline-20221203-23		1.44	70546			1			6421	2022-12-05	13:23:18	2:C,7	70546
24	Bedaquiline-20221203-24		1.44	72784			1			7893	2022-12-05	13:25:44	2:C,8	72784.1
Compound 2: M2
	Name	Sample Text	RT	Area	IS Area	Type	Std. Conc	Conc.	%Dev	S/N	Acq.Date	Acq.Time	Vial	Response
1	Bedaquiline-20221203-1		1.34	35206	74877.2					5319	2022-12-05	12:28:40	2:A,1	0.47
2	Bedaquiline-20221203-2		1.34	32066	71067.9					6039	2022-12-05	12:31:07	2:A,2	0.451
3	Bedaquiline-20221203-3		1.33	35670	82732.5					5821	2022-12-05	12:33:34	2:A,3	0.431
4	Bedaquiline-20221203-4		1.33	55587	81430.6					6625	2022-12-05	12:36:04	2:A,4	0.683
5	Bedaquiline-20221203-5		1.33	55510	81341.6					11662	2022-12-05	12:38:31	2:A,5	0.682
6	Bedaquiline-20221203-6		1.33	51091	77161.4					4945	2022-12-05	12:40:58	2:A,6	0.662
7	Bedaquiline-20221203-7		1.34	74281	65826.9					10933	2022-12-05	12:43:30	2:A,7	1.128
8	Bedaquiline-20221203-8		1.34	74507	65409.6					7590	2022-12-05	12:45:57	2:A,8	1.139
9	Bedaquiline-20221203-9		1.33	66452	52337.9					7999	2022-12-05	12:48:23	2:B,1	1.27
10	Bedaquiline-20221203-10		1.33	137030	81093.5					12573	2022-12-05	12:50:57	2:B,2	1.69
11	Bedaquiline-20221203-11		1.33	139938	84810.2					15600	2022-12-05	12:53:24	2:B,3	1.65
12	Bedaquiline-20221203-12		1.34	136158	75360.5					12421	2022-12-05	12:55:56	2:B,4	1.807
13	Bedaquiline-20221203-13		1.33	289964	83805.6					39418	2022-12-05	12:58:30	2:B,5	3.46
14	Bedaquiline-20221203-14		1.34	288941	75425.8					21234	2022-12-05	13:00:56	2:B,6	3.831
15	Bedaquiline-20221203-15		1.34	272612	70470.4					22613	2022-12-05	13:03:23	2:B,7	3.868
16	Bedaquiline-20221203-16		1.33	303291	79823.3					25079	2022-12-05	13:05:50	2:B,8	3.8
17	Bedaquiline-20221203-17		1.33	251943	62434.8					23335	2022-12-05	13:08:20	2:C,1	4.035
18	Bedaquiline-20221203-18		1.33	319663	85457.7					15074	2022-12-05	13:10:46	2:C,2	3.741
19	Bedaquiline-20221203-19		1.34	274264	65334.3					31103	2022-12-05	13:13:19	2:C,3	4.198
20	Bedaquiline-20221203-20		1.33	319893	84482.3					34088	2022-12-05	13:15:47	2:C,4	3.787
21	Bedaquiline-20221203-21		1.33	312879	78650.8					8199	2022-12-05	13:18:19	2:C,5	3.978
22	Bedaquiline-20221203-22		1.34	303795	68817.7					35250	2022-12-05	13:20:45	2:C,6	4.414
23	Bedaquiline-20221203-23		1.34	304098	70546					27221	2022-12-05	13:23:18	2:C,7	4.311
24	Bedaquiline-20221203-24		1.34	310760	72784.1					30821	2022-12-05	13:25:44	2:C,8	4.27
