# Supplementary material for: Inhibitory effect of carvedilol on bedaquiline metabolism in vitro and in vivo
Source: PeerJ journal article supplement (doi:10.7717/peerj.19313), 2025-04-30
Supplement: Data.zip [file Fig.3C.xlsx]

## Sheet: Sheet1
Quantify Compound Summary Report
Printed Sun Jul 02 09:04:10 2023
Compound 1: Diazepam
	Name	Sample Text	RT	Area	IS Area	Type	Std. Conc	Conc.	%Dev	Response	S/N	Acq.Date	Acq.Time	Vial
1	Beda-20230611-A1		1.45	58546.9			1			58546.9	10941.5	2023-06-13	10:51:52	2:A,1
2	Beda-20230611-A2		1.45	56708.4			1			56708.4	11831.1	2023-06-13	10:54:18	2:A,2
3	Beda-20230611-A3		1.45	57079			1			57079	12832.7	2023-06-13	10:56:45	2:A,3
4	Beda-20230611-A4		1.45	54870.2			1			54870.2	8331.46	2023-06-13	10:59:16	2:A,4
5	Beda-20230611-A5		1.45	65807.3			1			65807.3	11469.3	2023-06-13	11:01:51	2:A,5
6	Beda-20230611-A6		1.45	61313.9			1			61313.9	10991.8	2023-06-13	11:04:25	2:A,6
7	Beda-20230611-A7		1.45	58209.7			1			58209.7	15391.2	2023-06-13	11:06:54	2:A,7
8	Beda-20230611-A8		1.45	59929.6			1			59929.6	13414.6	2023-06-13	11:09:26	2:A,8
9	Beda-20230611-A9		1.45	57757.2			1			57757.2	11027.5	2023-06-13	11:11:52	2:B,1
10	Beda-20230611-A10		1.45	65068.4			1			65068.4	12748.7	2023-06-13	11:14:20	2:B,2
11	Beda-20230611-A11		1.45	57299.6			1			57299.6	11848.3	2023-06-13	11:16:52	2:B,3
12	Beda-20230611-A12		1.45	63640.7			1			63640.7	11909.1	2023-06-13	11:19:26	2:B,4
13	Beda-20230611-A13		1.45	61937.4			1			61937.4	6870.39	2023-06-13	11:21:52	2:B,5
14	Beda-20230611-A14		1.45	62236.3			1			62236.3	19735.3	2023-06-13	11:24:25	2:B,6
15	Beda-20230611-A15		1.45	59786.3			1			59786.3	11875.5	2023-06-13	11:26:52	2:B,7
16	Beda-20230611-A16		1.45	57375.4			1			57375.4	20114.7	2023-06-13	11:29:24	2:B,8
17	Beda-20230611-A17		1.45	57961			1			57961	19045.3	2023-06-13	11:31:50	2:C,1
18	Beda-20230611-A18		1.45	56837.5			1			56837.5	12393	2023-06-13	11:34:17	2:C,2
19	Beda-20230611-A19		1.45	59237.1			1			59237.1	13490.4	2023-06-13	11:36:49	2:C,3
20	Beda-20230611-A20		1.45	56967.6			1			56967.6	18994.4	2023-06-13	11:39:15	2:C,4
21	Beda-20230611-A21		1.45	64620.3			1			64620.3	15183.8	2023-06-13	11:41:42	2:C,5
22	Beda-20230611-A22		1.45	74553.8			1			74553.8	23302.7	2023-06-13	11:44:14	2:C,6
23	Beda-20230611-A23		1.45	64563			1			64563	12469.7	2023-06-13	11:46:40	2:C,7
24	Beda-20230611-A24		1.45	66242.7			1			66242.7	16514.6	2023-06-13	11:49:06	2:C,8
Compound 2: M2
	Name	Sample Text	RT	Area	IS Area	Type	Std. Conc	Conc.	%Dev	Response	S/N	Acq.Date	Acq.Time	Vial
1	Beda-20230611-A1		1.36	1115.23	58546.9					0.019	934.134	2023-06-13	10:51:52	2:A,1
2	Beda-20230611-A2		1.36	1112.26	56708.4					0.02	630.965	2023-06-13	10:54:18	2:A,2																	LogIC50	-0.1042
3	Beda-20230611-A3		1.37	1088.13	57079					0.019	1095.57	2023-06-13	10:56:45	2:A,3																	IC50	0.7866
4	Beda-20230611-A4		1.36	1818.85	54870.2					0.033	1503.98	2023-06-13	10:59:16	2:A,4
5	Beda-20230611-A5		1.37	1918.43	65807.3					0.029	1055.1	2023-06-13	11:01:51	2:A,5
6	Beda-20230611-A6		1.37	1588.92	61313.9					0.026	618.917	2023-06-13	11:04:25	2:A,6
7	Beda-20230611-A7		1.37	2216.93	58209.7					0.038	1565.48	2023-06-13	11:06:54	2:A,7
8	Beda-20230611-A8		1.36	2441.82	59929.6					0.041	1270.77	2023-06-13	11:09:26	2:A,8
9	Beda-20230611-A9		1.36	2695.18	57757.2					0.047	2269.29	2023-06-13	11:11:52	2:B,1
10	Beda-20230611-A10		1.36	16842.2	65068.4					0.259	8732.57	2023-06-13	11:14:20	2:B,2
11	Beda-20230611-A11		1.36	10829.8	57299.6					0.189	6128.23	2023-06-13	11:16:52	2:B,3
12	Beda-20230611-A12		1.37	7843.39	63640.7					0.123	5118.78	2023-06-13	11:19:26	2:B,4
13	Beda-20230611-A13		1.36	33908.5	61937.4					0.547	18290.2	2023-06-13	11:21:52	2:B,5
14	Beda-20230611-A14		1.37	33319.6	62236.3					0.535	21739.5	2023-06-13	11:24:25	2:B,6
15	Beda-20230611-A15		1.36	32310.4	59786.3					0.54	15394.9	2023-06-13	11:26:52	2:B,7
16	Beda-20230611-A16		1.37	65485.8	57375.4					1.141	41107.7	2023-06-13	11:29:24	2:B,8
17	Beda-20230611-A17		1.36	66293	57961					1.144	32320.3	2023-06-13	11:31:50	2:C,1
18	Beda-20230611-A18		1.36	64781.6	56837.5					1.14	42502.7	2023-06-13	11:34:17	2:C,2
19	Beda-20230611-A19		1.36	75070.7	59237.1					1.267	33727.7	2023-06-13	11:36:49	2:C,3
20	Beda-20230611-A20		1.37	73016.6	56967.6					1.282	55259.8	2023-06-13	11:39:15	2:C,4
21	Beda-20230611-A21		1.37	82212.7	64620.3					1.272	32115.2	2023-06-13	11:41:42	2:C,5
22	Beda-20230611-A22		1.36	94248.6	74553.8					1.264	41154.2	2023-06-13	11:44:14	2:C,6
23	Beda-20230611-A23		1.36	82857.1	64563					1.283	35266.2	2023-06-13	11:46:40	2:C,7
24	Beda-20230611-A24		1.36	87431.4	66242.7					1.32	29906.1	2023-06-13	11:49:06	2:C,8
