# Supplementary material for: Inhibitory effect of carvedilol on bedaquiline metabolism in vitro and in vivo
Source: PeerJ journal article supplement (doi:10.7717/peerj.19313), 2025-04-30
Supplement: Data.zip [file Fig.4A.xlsx]

## Sheet: Sheet1
Quantify Compound Summary Report
Printed Fri Nov 04 08:46:02 2022
Compound 1: Diazepam
	Name	Sample Text	RT	Area	IS Area	Type	Std. Conc	Conc.	%Dev	S/N	Acq.Date	Acq.Time	Vial	Response
1	bedaq-20221101-A1		1.43	45903			1			4419	2022-11-01	20:54:55	2:A,1	45902.8
2	bedaq-20221101-A2		1.43	44622			1			5867	2022-11-01	20:57:28	2:A,2	44621.5
3	bedaq-20221101-A3		1.42	43936			1			4532	2022-11-01	20:59:56	2:A,3	43935.9
4	bedaq-20221101-A4		1.42	46041			1			3180	2022-11-01	21:02:28	2:A,4	46040.6
5	bedaq-20221101-A5		1.43	45101			1			10656	2022-11-01	21:04:54	2:A,5	45100.7
6	bedaq-20221101-A6		1.42	47738			1			6970	2022-11-01	21:07:27	2:A,6	47738.1
7	bedaq-20221101-A7		1.42	45773			1			11623	2022-11-01	21:09:53	2:A,7	45773.2
8	bedaq-20221101-A8		1.42	45062			1			10536	2022-11-01	21:12:19	2:A,8	45061.7
9	bedaq-20221101-A9		1.42	44756			1			6733	2022-11-01	21:14:51	2:B,1	44755.5
10	bedaq-20221101-A10		1.43	44303			1			4610	2022-11-01	21:17:19	2:B,2	44303.4
11	bedaq-20221101-A11		1.42	44079			1			5207	2022-11-01	21:19:51	2:B,3	44079.4
12	bedaq-20221101-A12		1.43	45113			1			6435	2022-11-01	21:22:17	2:B,4	45112.9
13	bedaq-20221101-A13		1.42	45756			1			12016	2022-11-01	21:24:44	2:B,5	45756
14	bedaq-20221101-A14		1.42	44470			1			10825	2022-11-01	21:27:16	2:B,6	44470
15	bedaq-20221101-A15		1.42	43972			1			6293	2022-11-01	21:29:45	2:B,7	43971.6
16	bedaq-20221101-A16		1.43	43209			1			6557	2022-11-01	21:32:16	2:B,8	43208.5
17	bedaq-20221101-A17		1.42	43955			1			7319	2022-11-01	21:34:41	2:C,1	43955.2
18	bedaq-20221101-A18		1.42	42754			1			6302	2022-11-01	21:37:08	2:C,2	42754.3
19	bedaq-20221101-A19		1.42	44167			1			6092	2022-11-01	21:39:35	2:C,3	44166.8
20	bedaq-20221101-A20		1.42	43744			1			13668	2022-11-01	21:42:07	2:C,4	43743.7
21	bedaq-20221101-A21		1.42	44968			1			8072	2022-11-01	21:44:33	2:C,5	44967.9
22	bedaq-20221101-A22		1.42	43153			1			6051	2022-11-01	21:46:59	2:C,6	43152.9
23	bedaq-20221101-A23		1.42	44070			1			4395	2022-11-01	21:49:27	2:C,7	44070.1
24	bedaq-20221101-A24		1.42	45190			1			5008	2022-11-01	21:51:58	2:C,8	45189.6
25	bedaq-20221101-B1		1.42	41683			1			8918	2022-11-01	21:54:23	2:D,1	41682.6
26	bedaq-20221101-B2		1.42	40425			1			8361	2022-11-01	21:56:50	2:D,2	40424.9
27	bedaq-20221101-B3		1.42	39945			1			7349	2022-11-01	21:59:22	2:D,3	39945
28	bedaq-20221101-B4		1.43	43905			1			10046	2022-11-01	22:01:49	2:D,4	43904.5
29	bedaq-20221101-B5		1.42	41393			1			6422	2022-11-01	22:04:16	2:D,5	41393
30	bedaq-20221101-B6		1.42	39581			1			5930	2022-11-01	22:06:47	2:D,6	39581.1
31	bedaq-20221101-B7		1.42	43848			1			4424	2022-11-01	22:09:13	2:D,7	43848.2
32	bedaq-20221101-B8		1.42	43197			1			10642	2022-11-01	22:11:39	2:D,8	43196.7
33	bedaq-20221101-B9		1.42	44303			1			7636	2022-11-01	22:14:11	2:E,1	44302.5
34	bedaq-20221101-B10		1.42	42956			1			5127	2022-11-01	22:16:38	2:E,2	42956.2
35	bedaq-20221101-B11		1.43	43642			1			7470	2022-11-01	22:19:05	2:E,3	43641.7
36	bedaq-20221101-B12		1.42	44015			1			7901	2022-11-01	22:21:38	2:E,4	44015.4
37	bedaq-20221101-B13		1.42	41965			1			4630	2022-11-01	22:24:04	2:E,5	41964.6
38	bedaq-20221101-B14		1.42	41918			1			13291	2022-11-01	22:26:31	2:E,6	41917.9
39	bedaq-20221101-B15		1.42	40207			1			16098	2022-11-01	22:28:57	2:E,7	40207.4
40	bedaq-20221101-B16		1.43	42146			1			6895	2022-11-01	22:31:29	2:E,8	42145.7
41	bedaq-20221101-B17		1.42	42102			1			7058	2022-11-01	22:33:55	2:F,1	42102
42	bedaq-20221101-B18		1.43	42544			1			6735	2022-11-01	22:36:22	2:F,2	42544
43	bedaq-20221101-B19		1.43	42203			1			7553	2022-11-01	22:38:54	2:F,3	42202.7
44	bedaq-20221101-B20		1.42	42549			1			11412	2022-11-01	22:41:21	2:F,4	42548.7
45	bedaq-20221101-B21		1.42	41991			1			5974	2022-11-01	22:43:53	2:F,5	41990.7
46	bedaq-20221101-B22		1.42	41699			1			9204	2022-11-01	22:46:19	2:F,6	41698.8
47	bedaq-20221101-B23		1.42	42598			1			4792	2022-11-01	22:48:46	2:F,7	42598.5
48	bedaq-20221101-B24		1.43	42253			1			8733	2022-11-01	22:51:17	2:F,8	42252.7
Compound 2: M2
	Name	Sample Text	RT	Area	IS Area	Type	Std. Conc	Conc.	%Dev	S/N	Acq.Date	Acq.Time	Vial	Response
1	bedaq-20221101-A1		1.36	48068	45902.8		1			9543	2022-11-01	20:54:55	2:A,1	1.047
2	bedaq-20221101-A2		1.35	45210	44621.5		1			4180	2022-11-01	20:57:28	2:A,2	1.013
3	bedaq-20221101-A3		1.35	46150	43935.9		1			5413	2022-11-01	20:59:56	2:A,3	1.05
4	bedaq-20221101-A4		1.35	80767	46040.6		1			11495	2022-11-01	21:02:28	2:A,4	1.754
5	bedaq-20221101-A5		1.35	81980	45100.7		1			12384	2022-11-01	21:04:54	2:A,5	1.818
6	bedaq-20221101-A6		1.35	81963	47738.1		1			16063	2022-11-01	21:07:27	2:A,6	1.717
7	bedaq-20221101-A7		1.35	131222	45773.2		1			36937	2022-11-01	21:09:53	2:A,7	2.867
8	bedaq-20221101-A8		1.35	124304	45061.7		1			16239	2022-11-01	21:12:19	2:A,8	2.759
9	bedaq-20221101-A9		1.35	118927	44755.5		1			12287	2022-11-01	21:14:51	2:B,1	2.657
10	bedaq-20221101-A10		1.35	173695	44303.4		1			25077	2022-11-01	21:17:19	2:B,2	3.921
11	bedaq-20221101-A11		1.35	177549	44079.4		1			23996	2022-11-01	21:19:51	2:B,3	4.028
12	bedaq-20221101-A12		1.35	189987	45112.9		1			34466	2022-11-01	21:22:17	2:B,4	4.211
13	bedaq-20221101-A13		1.35	280800	45756		1			38688	2022-11-01	21:24:44	2:B,5	6.137
14	bedaq-20221101-A14		1.35	273279	44470		1			48631	2022-11-01	21:27:16	2:B,6	6.145
15	bedaq-20221101-A15		1.35	274355	43971.6		1			69991	2022-11-01	21:29:45	2:B,7	6.239
16	bedaq-20221101-A16		1.35	300771	43208.5		1			46023	2022-11-01	21:32:16	2:B,8	6.961
17	bedaq-20221101-A17		1.35	316334	43955.2		1			44324	2022-11-01	21:34:41	2:C,1	7.197
18	bedaq-20221101-A18		1.35	322338	42754.3		1			55130	2022-11-01	21:37:08	2:C,2	7.539
19	bedaq-20221101-A19		1.35	323967	44166.8		1			54492	2022-11-01	21:39:35	2:C,3	7.335
20	bedaq-20221101-A20		1.35	317934	43743.7		1			49978	2022-11-01	21:42:07	2:C,4	7.268
21	bedaq-20221101-A21		1.35	312683	44967.9		1			68250	2022-11-01	21:44:33	2:C,5	6.953
22	bedaq-20221101-A22		1.35	324401	43152.9		1			56701	2022-11-01	21:46:59	2:C,6	7.517
23	bedaq-20221101-A23		1.35	327128	44070.1		1			17263	2022-11-01	21:49:27	2:C,7	7.423
24	bedaq-20221101-A24		1.35	324488	45189.6		1			52154	2022-11-01	21:51:58	2:C,8	7.181
25	bedaq-20221101-B1		1.35	41789	41682.6		1			5165	2022-11-01	21:54:23	2:D,1	1.003
26	bedaq-20221101-B2		1.35	41932	40424.9		1			9243	2022-11-01	21:56:50	2:D,2	1.037
27	bedaq-20221101-B3		1.35	41859	39945		1			9041	2022-11-01	21:59:22	2:D,3	1.048
28	bedaq-20221101-B4		1.35	74162	43904.5		1			14057	2022-11-01	22:01:49	2:D,4	1.689
29	bedaq-20221101-B5		1.35	75242	41393		1			15422	2022-11-01	22:04:16	2:D,5	1.818
30	bedaq-20221101-B6		1.35	79264	39581.1		1			16892	2022-11-01	22:06:47	2:D,6	2.003
31	bedaq-20221101-B7		1.35	114760	43848.2		1			14824	2022-11-01	22:09:13	2:D,7	2.617
32	bedaq-20221101-B8		1.35	119338	43196.7		1			15313	2022-11-01	22:11:39	2:D,8	2.763
33	bedaq-20221101-B9		1.35	123387	44302.5		1			17393	2022-11-01	22:14:11	2:E,1	2.785
34	bedaq-20221101-B10		1.35	185679	42956.2		1			27563	2022-11-01	22:16:38	2:E,2	4.323
35	bedaq-20221101-B11		1.35	184840	43641.7		1			28857	2022-11-01	22:19:05	2:E,3	4.235
36	bedaq-20221101-B12		1.35	189920	44015.4		1			53986	2022-11-01	22:21:38	2:E,4	4.315
37	bedaq-20221101-B13		1.35	312434	41964.6		1			38991	2022-11-01	22:24:04	2:E,5	7.445
38	bedaq-20221101-B14		1.35	294031	41917.9		1			57242	2022-11-01	22:26:31	2:E,6	7.014
39	bedaq-20221101-B15		1.35	251698	40207.4		1			34346	2022-11-01	22:28:57	2:E,7	6.26
40	bedaq-20221101-B16		1.35	328472	42145.7		1			89976	2022-11-01	22:31:29	2:E,8	7.794
41	bedaq-20221101-B17		1.35	331425	42102		1			54446	2022-11-01	22:33:55	2:F,1	7.872
42	bedaq-20221101-B18		1.35	324587	42544		1			59824	2022-11-01	22:36:22	2:F,2	7.629
43	bedaq-20221101-B19		1.35	352003	42202.7		1			55099	2022-11-01	22:38:54	2:F,3	8.341
44	bedaq-20221101-B20		1.35	354975	42548.7		1			78569	2022-11-01	22:41:21	2:F,4	8.343
45	bedaq-20221101-B21		1.35	370598	41990.7		1			109361	2022-11-01	22:43:53	2:F,5	8.826
46	bedaq-20221101-B22		1.35	365946	41698.8		1			61170	2022-11-01	22:46:19	2:F,6	8.776
47	bedaq-20221101-B23		1.35	354931	42598.5		1			47862	2022-11-01	22:48:46	2:F,7	8.332
48	bedaq-20221101-B24		1.35	329913	42252.7		1			52814	2022-11-01	22:51:17	2:F,8	7.808
