# Supplementary material for: Inhibitory effect of carvedilol on bedaquiline metabolism in vitro and in vivo
Source: PeerJ journal article supplement (doi:10.7717/peerj.19313), 2025-04-30
Supplement: Data.zip [file Fig.4B.xlsx]

## Sheet: Sheet1
Quantify Compound Summary Report
Printed Wed Dec 14 22:50:52 2022
Compound 1: Diazepam
	Name	Sample Text	RT	Area	IS Area	Type	Std. Conc	Conc.	%Dev	S/N	Acq.Date	Acq.Time	Vial	Response
1	Bedaquiline-20221212-A1		1.44	61763			1			3821	2022-12-13	11:34:56	2:A,1	61763.3
2	Bedaquiline-20221212-A2		1.44	63729			1			7861	2022-12-13	11:37:24	2:A,2	63729.4
3	Bedaquiline-20221212-A3		1.44	64058			1			5875	2022-12-13	11:39:57	2:A,3	64058.3
4	Bedaquiline-20221212-A4		1.44	61790			1			5280	2022-12-13	11:42:25	2:A,4	61789.9
5	Bedaquiline-20221212-A5		1.44	64402			1			4990	2022-12-13	11:44:57	2:A,5	64402.1
6	Bedaquiline-20221212-A6		1.43	64601			1			6069	2022-12-13	11:47:31	2:A,6	64601.2
7	Bedaquiline-20221212-A7		1.44	61903			1			5852	2022-12-13	11:49:57	2:A,7	61902.5
8	Bedaquiline-20221212-A8		1.44	62990			1			5060	2022-12-13	11:52:30	2:A,8	62990
9	Bedaquiline-20221212-A9		1.44	61070			1			8106	2022-12-13	11:54:58	2:B,1	61070.3
10	Bedaquiline-20221212-A10		1.44	62419			1			1917	2022-12-13	11:57:30	2:B,2	62418.6
11	Bedaquiline-20221212-A11		1.44	62841			1			6057	2022-12-13	11:59:57	2:B,3	62841.5
12	Bedaquiline-20221212-A12		1.44	66201			1			4692	2022-12-13	12:02:25	2:B,4	66201
13	Bedaquiline-20221212-A13		1.43	62006			1			8246	2022-12-13	12:04:56	2:B,5	62005.8
14	Bedaquiline-20221212-A14		1.44	66344			1			7296	2022-12-13	12:07:26	2:B,6	66343.9
15	Bedaquiline-20221212-A15		1.44	62458			1			6140	2022-12-13	12:09:58	2:B,7	62458.4
16	Bedaquiline-20221212-A16		1.44	63625			1			5437	2022-12-13	12:12:24	2:B,8	63624.6
17	Bedaquiline-20221212-A17		1.44	61477			1			9549	2022-12-13	12:14:50	2:C,1	61477
18	Bedaquiline-20221212-A18		1.44	65247			1			7806	2022-12-13	12:17:23	2:C,2	65246.6
19	Bedaquiline-20221212-A19		1.43	62432			1			6010	2022-12-13	12:19:50	2:C,3	62432.2
20	Bedaquiline-20221212-A20		1.43	60470			1			5751	2022-12-13	12:22:22	2:C,4	60470.3
21	Bedaquiline-20221212-A21		1.43	59843			1			6799	2022-12-13	12:24:50	2:C,5	59842.6
22	Bedaquiline-20221212-A22		1.43	60263			1			6120	2022-12-13	12:27:22	2:C,6	60262.6
23	Bedaquiline-20221212-A23		1.44	61595			1			4145	2022-12-13	12:29:47	2:C,7	61594.7
24	Bedaquiline-20221212-A24		1.44	61584			1			10258	2022-12-13	12:32:14	2:C,8	61584.2
25	Bedaquiline-20221212-B1		1.43	33751			1			4764	2022-12-13	12:34:40	2:D,1	33751.2
26	Bedaquiline-20221212-B2		1.43	61379			1			6639	2022-12-13	12:37:06	2:D,2	61379
27	Bedaquiline-20221212-B3		1.44	64343			1			7361	2022-12-13	12:39:38	2:D,3	64343.2
28	Bedaquiline-20221212-B4		1.43	62769			1			6797	2022-12-13	12:42:04	2:D,4	62768.6
29	Bedaquiline-20221212-B5		1.44	62741			1			6551	2022-12-13	12:44:31	2:D,5	62740.5
30	Bedaquiline-20221212-B6		1.43	61783			1			5326	2022-12-13	12:46:57	2:D,6	61782.8
31	Bedaquiline-20221212-B7		1.43	58439			1			3276	2022-12-13	12:49:24	2:D,7	58438.6
32	Bedaquiline-20221212-B8		1.43	54530			1			4219	2022-12-13	12:51:49	2:D,8	54530.4
33	Bedaquiline-20221212-B9						1				2022-12-13	12:54:17	2:E,1
34	Bedaquiline-20221212-B10		1.44	60966			1			6777	2022-12-13	12:56:43	2:E,2	60965.7
35	Bedaquiline-20221212-B11		1.43	60460			1			7150	2022-12-13	12:59:18	2:E,3	60459.5
36	Bedaquiline-20221212-B12		1.44	62189			1			3945	2022-12-13	13:01:45	2:E,4	62189.1
37	Bedaquiline-20221212-B13		1.44	60509			1			6208	2022-12-13	13:04:19	2:E,5	60508.9
38	Bedaquiline-20221212-B14		1.44	68685			1			6597	2022-12-13	13:06:48	2:E,6	68685.2
39	Bedaquiline-20221212-B15		1.43	64334			1			5705	2022-12-13	13:09:17	2:E,7	64333.9
40	Bedaquiline-20221212-B16		1.44	61519			1			8959	2022-12-13	13:11:43	2:E,8	61519
41	Bedaquiline-20221212-B17		1.44	60694			1			8912	2022-12-13	13:14:08	2:F,1	60693.6
42	Bedaquiline-20221212-B18		1.43	62478			1			6194	2022-12-13	13:16:37	2:F,2	62477.7
43	Bedaquiline-20221212-B19		1.43	57562			1			6408	2022-12-13	13:19:02	2:F,3	57562
44	Bedaquiline-20221212-B20		1.43	57040			1			5895	2022-12-13	13:21:32	2:F,4	57040.1
45	Bedaquiline-20221212-B21		1.44	62371			1			5793	2022-12-13	13:24:01	2:F,5	62371.3
46	Bedaquiline-20221212-B22		1.44	60081			1			7891	2022-12-13	13:26:27	2:F,6	60081.1
47	Bedaquiline-20221212-B23		1.43	60451			1			6117	2022-12-13	13:28:54	2:F,7	60451
48	Bedaquiline-20221212-B24		1.43	59553			1			3904	2022-12-13	13:31:20	2:F,8	59553.2
Compound 2: M2
	Name	Sample Text	RT	Area	IS Area	Type	Std. Conc	Conc.	%Dev	S/N	Acq.Date	Acq.Time	Vial	Response
1	Bedaquiline-20221212-A1		1.35	14620	61763.3					3943	2022-12-13	11:34:56	2:A,1	0.237
2	Bedaquiline-20221212-A2		1.35	14175	63729.4					2426	2022-12-13	11:37:24	2:A,2	0.222
3	Bedaquiline-20221212-A3		1.35	13526	64058.3					1998	2022-12-13	11:39:57	2:A,3	0.211
4	Bedaquiline-20221212-A4		1.35	19467	61789.9					3338	2022-12-13	11:42:25	2:A,4	0.315
5	Bedaquiline-20221212-A5		1.35	21097	64402.1					4292	2022-12-13	11:44:57	2:A,5	0.328
6	Bedaquiline-20221212-A6		1.35	21889	64601.2					3084	2022-12-13	11:47:31	2:A,6	0.339
7	Bedaquiline-20221212-A7		1.35	30092	61902.5					4008	2022-12-13	11:49:57	2:A,7	0.486
8	Bedaquiline-20221212-A8		1.35	29871	62990					5830	2022-12-13	11:52:30	2:A,8	0.474
9	Bedaquiline-20221212-A9		1.35	31570	61070.3					7058	2022-12-13	11:54:58	2:B,1	0.517
10	Bedaquiline-20221212-A10		1.35	48489	62418.6					7049	2022-12-13	11:57:30	2:B,2	0.777
11	Bedaquiline-20221212-A11		1.35	48805	62841.5					4438	2022-12-13	11:59:57	2:B,3	0.777
12	Bedaquiline-20221212-A12		1.35	49497	66201					9352	2022-12-13	12:02:25	2:B,4	0.748
13	Bedaquiline-20221212-A13		1.35	112567	62005.8					16317	2022-12-13	12:04:56	2:B,5	1.815
14	Bedaquiline-20221212-A14		1.35	107667	66343.9					6046	2022-12-13	12:07:26	2:B,6	1.623
15	Bedaquiline-20221212-A15		1.35	104756	62458.4					4455	2022-12-13	12:09:58	2:B,7	1.677
16	Bedaquiline-20221212-A16		1.35	139705	63624.6					14823	2022-12-13	12:12:24	2:B,8	2.196
17	Bedaquiline-20221212-A17		1.35	131941	61477					11157	2022-12-13	12:14:50	2:C,1	2.146
18	Bedaquiline-20221212-A18		1.35	134371	65246.6					9491	2022-12-13	12:17:23	2:C,2	2.059
19	Bedaquiline-20221212-A19		1.35	136268	62432.2					9939	2022-12-13	12:19:50	2:C,3	2.183
20	Bedaquiline-20221212-A20		1.35	136547	60470.3					9952	2022-12-13	12:22:22	2:C,4	2.258
21	Bedaquiline-20221212-A21		1.35	137086	59842.6					35606	2022-12-13	12:24:50	2:C,5	2.291
22	Bedaquiline-20221212-A22		1.35	133091	60262.6					7373	2022-12-13	12:27:22	2:C,6	2.209
23	Bedaquiline-20221212-A23		1.35	140472	61594.7					17476	2022-12-13	12:29:47	2:C,7	2.281
24	Bedaquiline-20221212-A24		1.35	137433	61584.2					14576	2022-12-13	12:32:14	2:C,8	2.232
25	Bedaquiline-20221212-B1		1.35	4164	33751.2					1279	2022-12-13	12:34:40	2:D,1	0.123
26	Bedaquiline-20221212-B2		1.35	7685	61379					1107	2022-12-13	12:37:06	2:D,2	0.125
27	Bedaquiline-20221212-B3		1.35	7188	64343.2					1685	2022-12-13	12:39:38	2:D,3	0.112
28	Bedaquiline-20221212-B4		1.35	10767	62768.6					2003	2022-12-13	12:42:04	2:D,4	0.172
29	Bedaquiline-20221212-B5		1.35	10150	62740.5					1446	2022-12-13	12:44:31	2:D,5	0.162
30	Bedaquiline-20221212-B6		1.35	9480	61782.8					1850	2022-12-13	12:46:57	2:D,6	0.153
31	Bedaquiline-20221212-B7		1.35	13979	58438.6					2125	2022-12-13	12:49:24	2:D,7	0.239
32	Bedaquiline-20221212-B8		1.35	13828	54530.4					2527	2022-12-13	12:51:49	2:D,8	0.254
33	Bedaquiline-20221212-B9		1.35	11037						4676	2022-12-13	12:54:17	2:E,1	0.202401
34	Bedaquiline-20221212-B10		1.35	25125	60965.7					3090	2022-12-13	12:56:43	2:E,2	0.412
35	Bedaquiline-20221212-B11		1.35	25233	60459.5					4806	2022-12-13	12:59:18	2:E,3	0.417
36	Bedaquiline-20221212-B12		1.35	25414	62189.1					4921	2022-12-13	13:01:45	2:E,4	0.409
37	Bedaquiline-20221212-B13		1.35	80046	60508.9					6481	2022-12-13	13:04:19	2:E,5	1.323
38	Bedaquiline-20221212-B14		1.35	87399	68685.2					14607	2022-12-13	13:06:48	2:E,6	1.272
39	Bedaquiline-20221212-B15		1.35	83694	64333.9					10508	2022-12-13	13:09:17	2:E,7	1.301
40	Bedaquiline-20221212-B16		1.35	115065	61519					17491	2022-12-13	13:11:43	2:E,8	1.87
41	Bedaquiline-20221212-B17		1.35	114058	60693.6					17875	2022-12-13	13:14:08	2:F,1	1.879
42	Bedaquiline-20221212-B18		1.35	121069	62477.7					8506	2022-12-13	13:16:37	2:F,2	1.938
43	Bedaquiline-20221212-B19		1.35	113994	57562					12680	2022-12-13	13:19:02	2:F,3	1.98
44	Bedaquiline-20221212-B20		1.35	113644	57040.1					13414	2022-12-13	13:21:32	2:F,4	1.992
45	Bedaquiline-20221212-B21		1.35	120499	62371.3					12514	2022-12-13	13:24:01	2:F,5	1.932
46	Bedaquiline-20221212-B22		1.35	109936	60081.1					17054	2022-12-13	13:26:27	2:F,6	1.83
47	Bedaquiline-20221212-B23		1.35	112580	60451					22097	2022-12-13	13:28:54	2:F,7	1.862
48	Bedaquiline-20221212-B24		1.35	112774	59553.2					6630	2022-12-13	13:31:20	2:F,8	1.894

## Sheet: Sheet3
Quantify Compound Summary Report
Printed Wed Dec 14 22:57:13 2022
Compound 1: fluvastatin
	Name	Sample Text	RT	Area	IS Area	Type	Std. Conc	Conc.	%Dev	S/N	Acq.Date	Acq.Time	Vial	Response
1	Atorvastatin-20221213-1		1.44	78			1			20	2022-12-14	15:31:32	2:A,1	77.621
2	Atorvastatin-20221213-2		1.47	7286			1			1418	2022-12-14	15:34:06	2:A,2	7286.1
3	Atorvastatin-20221213-3		1.45	5060			1			747	2022-12-14	15:36:39	2:A,3	5059.95
4	Atorvastatin-20221213-4		1.45	4480			1			534	2022-12-14	15:39:13	2:A,4	4479.54
5	Atorvastatin-20221213-5		1.44	4975			1			853	2022-12-14	15:41:46	2:A,5	4975.23
6	Atorvastatin-20221213-6		1.44	4208			1			1044	2022-12-14	15:44:20	2:A,6	4207.87
7	Atorvastatin-20221213-7		1.44	5117			1			1610	2022-12-14	15:46:53	2:A,7	5116.79
8	Atorvastatin-20221213-8		1.44	5141			1			1071	2022-12-14	15:49:23	2:A,8	5140.73
9	Atorvastatin-20221213-9		1.44	4377			1			619	2022-12-14	15:51:53	2:B,1	4377.22
10	Atorvastatin-20221213-10		1.44	4618			1			874	2022-12-14	15:54:26	2:B,2	4618.46
11	Atorvastatin-20221213-11		1.44	4331			1			1138	2022-12-14	15:57:00	2:B,3	4331.49
12	Atorvastatin-20221213-12		1.44	4129			1			892	2022-12-14	15:59:33	2:B,4	4128.88
13	Atorvastatin-20221213-13		1.44	4414			1			802	2022-12-14	16:02:01	2:B,5	4413.51
14	Atorvastatin-20221213-14		1.44	4482			1			1323	2022-12-14	16:04:33	2:B,6	4482.03
15	Atorvastatin-20221213-15		1.44	2260			1			385	2022-12-14	16:07:02	2:B,7	2260.33
16	Atorvastatin-20221213-16		1.44	2377			1			478	2022-12-14	16:09:32	2:B,8	2377.49
17	Atorvastatin-20221213-17		1.44	5596			1			1269	2022-12-14	16:12:05	2:C,1	5595.8
18	Atorvastatin-20221213-18		1.44	5154			1			708	2022-12-14	16:14:39	2:C,2	5153.68
19	Atorvastatin-20221213-19		1.44	5360			1			806	2022-12-14	16:17:13	2:C,3	5359.66
20	Atorvastatin-20221213-20		1.44	5173			1			664	2022-12-14	16:19:47	2:C,4	5172.77
21	Atorvastatin-20221213-21		1.44	4389			1			881	2022-12-14	16:22:15	2:C,5	4388.7
22	Atorvastatin-20221213-22		1.44	4836			1			1342	2022-12-14	16:24:46	2:C,6	4836.16
23	Atorvastatin-20221213-23		1.44	4765			1			986	2022-12-14	16:27:20	2:C,7	4764.56
24	Atorvastatin-20221213-24		1.44	5070			1			1286	2022-12-14	16:29:49	2:C,8	5070.15
25	Atorvastatin-20221213-25		1.44	5055			1			1572	2022-12-14	16:32:19	2:D,1	5055.47
26	Atorvastatin-20221213-26		1.44	4833			1			960	2022-12-14	16:34:47	2:D,2	4832.84
27	Atorvastatin-20221213-27		1.44	5085			1			702	2022-12-14	16:37:19	2:D,3	5085.44
28	Atorvastatin-20221213-28		1.44	4935			1			899	2022-12-14	16:39:53	2:D,4	4934.73
29	Atorvastatin-20221213-29		1.44	5186			1			866	2022-12-14	16:42:28	2:D,5	5185.77
30	Atorvastatin-20221213-30		1.44	5378			1			1851	2022-12-14	16:44:57	2:D,6	5378.05
31	Atorvastatin-20221213-31		1.44	6687			1			777	2022-12-14	16:47:27	2:D,7	6687.24
32	Atorvastatin-20221213-32		1.44	6835			1			1133	2022-12-14	16:50:01	2:D,8	6834.88
33	Atorvastatin-20221213-33		1.45	7940			1			1946	2022-12-14	16:52:29	2:E,1	7940.32
34	Atorvastatin-20221213-34		1.45	7502			1			1469	2022-12-14	16:55:01	2:E,2	7502.17
35	Atorvastatin-20221213-35		1.44	4143			1			851	2022-12-14	16:57:34	2:E,3	4143.19
36	Atorvastatin-20221213-36		1.44	5305			1			1244	2022-12-14	17:00:02	2:E,4	5304.74
Compound 2: 2-OH-Atorvastatin
	Name	Sample Text	RT	Area	IS Area	Type	Std. Conc	Conc.	%Dev	S/N	Acq.Date	Acq.Time	Vial	Response
1	Atorvastatin-20221213-1		1.42	69925	77.621					15864	2022-12-14	15:31:32	2:A,1	900.854
2	Atorvastatin-20221213-2		1.41	496659	7286.1					84589	2022-12-14	15:34:06	2:A,2	68.165
3	Atorvastatin-20221213-3		1.4	49507	5059.95					5653	2022-12-14	15:36:39	2:A,3	9.784
4	Atorvastatin-20221213-4		1.4	47726	4479.54					4521	2022-12-14	15:39:13	2:A,4	10.654
5	Atorvastatin-20221213-5		1.4	58136	4975.23					10104	2022-12-14	15:41:46	2:A,5	11.685
6	Atorvastatin-20221213-6		1.39	44793	4207.87					9861	2022-12-14	15:44:20	2:A,6	10.645
7	Atorvastatin-20221213-7		1.39	507213	5116.79					79698	2022-12-14	15:46:53	2:A,7	99.127
8	Atorvastatin-20221213-8		1.39	515990	5140.73					106903	2022-12-14	15:49:23	2:A,8	100.373
9	Atorvastatin-20221213-9		1.39	125343	4377.22					17284	2022-12-14	15:51:53	2:B,1	28.635
10	Atorvastatin-20221213-10		1.39	123275	4618.46					26973	2022-12-14	15:54:26	2:B,2	26.692
11	Atorvastatin-20221213-11		1.39	88266	4331.49					14056	2022-12-14	15:57:00	2:B,3	20.378
12	Atorvastatin-20221213-12		1.39	98938	4128.88					16459	2022-12-14	15:59:33	2:B,4	23.963
13	Atorvastatin-20221213-13		1.39	77207	4413.51					8978	2022-12-14	16:02:01	2:B,5	17.493
14	Atorvastatin-20221213-14		1.39	62911	4482.03					11334	2022-12-14	16:04:33	2:B,6	14.036
15	Atorvastatin-20221213-15		1.39	29139	2260.33					4638	2022-12-14	16:07:02	2:B,7	12.891
16	Atorvastatin-20221213-16		1.39	32030	2377.49					7518	2022-12-14	16:09:32	2:B,8	13.472
17	Atorvastatin-20221213-17		1.39	343923	5595.8					74482	2022-12-14	16:12:05	2:C,1	61.461
18	Atorvastatin-20221213-18		1.39	319435	5153.68					41100	2022-12-14	16:14:39	2:C,2	61.982
19	Atorvastatin-20221213-19		1.39	334049	5359.66					68614	2022-12-14	16:17:13	2:C,3	62.326
20	Atorvastatin-20221213-20		1.39	317827	5172.77					25866	2022-12-14	16:19:47	2:C,4	61.442
21	Atorvastatin-20221213-21		1.39	14399	4388.7					2311	2022-12-14	16:22:15	2:C,5	3.281
22	Atorvastatin-20221213-22		1.39	13895	4836.16					3171	2022-12-14	16:24:46	2:C,6	2.873
23	Atorvastatin-20221213-23		1.39	424799	4764.56					61697	2022-12-14	16:27:20	2:C,7	89.158
24	Atorvastatin-20221213-24		1.39	419312	5070.15					53808	2022-12-14	16:29:49	2:C,8	82.702
25	Atorvastatin-20221213-25		1.39	187501	5055.47					18046	2022-12-14	16:32:19	2:D,1	37.089
26	Atorvastatin-20221213-26		1.39	174800	4832.84					15317	2022-12-14	16:34:47	2:D,2	36.169
27	Atorvastatin-20221213-27		1.39	481236	5085.44					88644	2022-12-14	16:37:19	2:D,3	94.63
28	Atorvastatin-20221213-28		1.39	477083	4934.73					52385	2022-12-14	16:39:53	2:D,4	96.679
29	Atorvastatin-20221213-29		1.39	545219	5185.77					73305	2022-12-14	16:42:28	2:D,5	105.137
30	Atorvastatin-20221213-30		1.39	522971	5378.05					71029	2022-12-14	16:44:57	2:D,6	97.242
31	Atorvastatin-20221213-31		1.39	164039	6687.24					37327	2022-12-14	16:47:27	2:D,7	24.53
32	Atorvastatin-20221213-32		1.39	169753	6834.88					28043	2022-12-14	16:50:01	2:D,8	24.836
33	Atorvastatin-20221213-33		1.39	229334	7940.32					41115	2022-12-14	16:52:29	2:E,1	28.882
34	Atorvastatin-20221213-34		1.39	217816	7502.17					49604	2022-12-14	16:55:01	2:E,2	29.034
35	Atorvastatin-20221213-35		1.39	485940	4143.19					58250	2022-12-14	16:57:34	2:E,3	117.287
36	Atorvastatin-20221213-36		1.39	547634	5304.74					106074	2022-12-14	17:00:02	2:E,4	103.235
Compound 3: 4-OH-Atorvastatin
	Name	Sample Text	RT	Area	IS Area	Type	Std. Conc	Conc.	%Dev	S/N	Acq.Date	Acq.Time	Vial	Response
1	Atorvastatin-20221213-1		1.42	613226	77.621					23647	2022-12-14	15:31:32	2:A,1	7900.26
2	Atorvastatin-20221213-2		1.42	4630353	7286.1					213032	2022-12-14	15:34:06	2:A,2	635.504
3	Atorvastatin-20221213-3		1.4	411174	5059.95					58145	2022-12-14	15:36:39	2:A,3	81.26
4	Atorvastatin-20221213-4		1.4	381357	4479.54					53062	2022-12-14	15:39:13	2:A,4	85.133
5	Atorvastatin-20221213-5		1.4	483360	4975.23					88546	2022-12-14	15:41:46	2:A,5	97.153
6	Atorvastatin-20221213-6		1.4	381863	4207.87					49298	2022-12-14	15:44:20	2:A,6	90.75
7	Atorvastatin-20221213-7		1.4	4177613	5116.79					520038	2022-12-14	15:46:53	2:A,7	816.451
8	Atorvastatin-20221213-8		1.4	4255988	5140.73					713801	2022-12-14	15:49:23	2:A,8	827.896
9	Atorvastatin-20221213-9		1.4	986136	4377.22					79913	2022-12-14	15:51:53	2:B,1	225.288
10	Atorvastatin-20221213-10		1.39	902933	4618.46					59756	2022-12-14	15:54:26	2:B,2	195.505
11	Atorvastatin-20221213-11		1.39	678856	4331.49					82005	2022-12-14	15:57:00	2:B,3	156.726
12	Atorvastatin-20221213-12		1.39	778172	4128.88					118150	2022-12-14	15:59:33	2:B,4	188.47
13	Atorvastatin-20221213-13		1.4	644256	4413.51					96070	2022-12-14	16:02:01	2:B,5	145.974
14	Atorvastatin-20221213-14		1.39	488186	4482.03					70761	2022-12-14	16:04:33	2:B,6	108.921
15	Atorvastatin-20221213-15		1.39	229752	2260.33					30825	2022-12-14	16:07:02	2:B,7	101.645
16	Atorvastatin-20221213-16		1.4	273109	2377.49					46218	2022-12-14	16:09:32	2:B,8	114.873
17	Atorvastatin-20221213-17		1.39	2668048	5595.8					345398	2022-12-14	16:12:05	2:C,1	476.795
18	Atorvastatin-20221213-18		1.39	2488931	5153.68					509413	2022-12-14	16:14:39	2:C,2	482.943
19	Atorvastatin-20221213-19		1.4	2892256	5359.66					417260	2022-12-14	16:17:13	2:C,3	539.634
20	Atorvastatin-20221213-20		1.4	2703408	5172.77					454441	2022-12-14	16:19:47	2:C,4	522.623
21	Atorvastatin-20221213-21		1.39	110917	4388.7					11296	2022-12-14	16:22:15	2:C,5	25.273
22	Atorvastatin-20221213-22		1.39	112637	4836.16					18818	2022-12-14	16:24:46	2:C,6	23.291
23	Atorvastatin-20221213-23		1.39	3272274	4764.56					458248	2022-12-14	16:27:20	2:C,7	686.795
24	Atorvastatin-20221213-24		1.4	3543630	5070.15					594624	2022-12-14	16:29:49	2:C,8	698.92
25	Atorvastatin-20221213-25		1.39	1446909	5055.47					290619	2022-12-14	16:32:19	2:D,1	286.206
26	Atorvastatin-20221213-26		1.39	1349086	4832.84					144557	2022-12-14	16:34:47	2:D,2	279.15
27	Atorvastatin-20221213-27		1.39	3570038	5085.44					433066	2022-12-14	16:37:19	2:D,3	702.012
28	Atorvastatin-20221213-28		1.39	3501090	4934.73					251747	2022-12-14	16:39:53	2:D,4	709.48
29	Atorvastatin-20221213-29		1.39	3977451	5185.77					409430	2022-12-14	16:42:28	2:D,5	766.994
30	Atorvastatin-20221213-30		1.4	4246474	5378.05					667288	2022-12-14	16:44:57	2:D,6	789.594
31	Atorvastatin-20221213-31		1.39	1251892	6687.24					183559	2022-12-14	16:47:27	2:D,7	187.206
32	Atorvastatin-20221213-32		1.39	1284020	6834.88					221449	2022-12-14	16:50:01	2:D,8	187.863
33	Atorvastatin-20221213-33		1.39	1797895	7940.32					273248	2022-12-14	16:52:29	2:E,1	226.426
34	Atorvastatin-20221213-34		1.4	1787093	7502.17					275764	2022-12-14	16:55:01	2:E,2	238.21
35	Atorvastatin-20221213-35		1.39	3602821	4143.19					659073	2022-12-14	16:57:34	2:E,3	869.578
36	Atorvastatin-20221213-36		1.39	3956645	5304.74					496816	2022-12-14	17:00:02	2:E,4	745.87
