# Supplementary material for: Inhibitory effect of carvedilol on bedaquiline metabolism in vitro and in vivo
Source: PeerJ journal article supplement (doi:10.7717/peerj.19313), 2025-04-30
Supplement: Data.zip [file Fig.4C.xlsx]

## Sheet: Sheet1
Quantify Compound Summary Report
Printed Mon Jul 31 21:34:12 2023
Compound 1: Diazepam
	Name	Sample Text	RT	Area	IS Area	Type	Std. Conc	Conc.	%Dev	Response	S/N	Acq.Date	Acq.Time	Vial	Coeff. Of Determination
1	Beda-20230730-A1		1.45	81745.2			1			81745.2	12244.4	2023-07-31	08:00:48	2:A,1
2	Beda-20230730-A2		1.45	83565.5			1			83565.5	10150.6	2023-07-31	08:03:14	2:A,2
3	Beda-20230730-A3		1.45	73582.7			1			73582.7	11776.9	2023-07-31	08:05:45	2:A,3
4	Beda-20230730-A4		1.45	75536.4			1			75536.4	11363.8	2023-07-31	08:08:11	2:A,4
5	Beda-20230730-A5		1.45	83686.5			1			83686.5	39273.2	2023-07-31	08:10:44	2:A,5
6	Beda-20230730-A6		1.45	75467.6			1			75467.6	5509.87	2023-07-31	08:13:11	2:A,6
7	Beda-20230730-A7		1.45	77769			1			77769	25347.3	2023-07-31	08:15:38	2:A,7
8	Beda-20230730-A8		1.45	79465.6			1			79465.6	8661.57	2023-07-31	08:18:10	2:A,8
9	Beda-20230730-A9		1.45	75193.8			1			75193.8	6467.49	2023-07-31	08:20:37	2:B,1
10	Beda-20230730-A10		1.45	72467.8			1			72467.8	24338.9	2023-07-31	08:23:04	2:B,2
11	Beda-20230730-A11		1.45	71812.8			1			71812.8	18437	2023-07-31	08:25:36	2:B,3
12	Beda-20230730-A12		1.45	73729.7			1			73729.7	9475.81	2023-07-31	08:28:03	2:B,4
13	Beda-20230730-A13		1.45	68607.6			1			68607.6	20916.3	2023-07-31	08:30:35	2:B,5
14	Beda-20230730-A14		1.45	70458.3			1			70458.3	13103.1	2023-07-31	08:33:01	2:B,6
15	Beda-20230730-A15		1.45	75990.5			1			75990.5	16865.8	2023-07-31	08:35:34	2:B,7
16	Beda-20230730-A16		1.45	80389.7			1			80389.7	6854.17	2023-07-31	08:37:59	2:B,8
17	Beda-20230730-A17		1.45	68869.5			1			68869.5	7369.06	2023-07-31	08:40:27	2:C,1
18	Beda-20230730-A18		1.45	71856.5			1			71856.5	12283.9	2023-07-31	08:42:58	2:C,2
19	Beda-20230730-A19		1.45	72652			1			72652	13448.6	2023-07-31	08:45:25	2:C,3
20	Beda-20230730-A20		1.45	72607.2			1			72607.2	15648.5	2023-07-31	08:47:58	2:C,4
21	Beda-20230730-A21		1.45	71202.6			1			71202.6	23057.6	2023-07-31	08:50:24	2:C,5
22	Beda-20230730-A22		1.45	88043.4			1			88043.4	16370.5	2023-07-31	08:52:51	2:C,6
23	Beda-20230730-A23		1.45	74607			1			74607	10509.3	2023-07-31	08:55:23	2:C,7
24	Beda-20230730-A24		1.45	74122.5			1			74122.5	17741.9	2023-07-31	08:57:49	2:C,8
25	Beda-20230730-B1		1.45	74307.9			1			74307.9	19056	2023-07-31	09:00:16	2:D,1
26	Beda-20230730-B2		1.45	73069.8			1			73069.8	10257.1	2023-07-31	09:02:43	2:D,2
27	Beda-20230730-B3		1.45	75063.9			1			75063.9	6494.04	2023-07-31	09:05:15	2:D,3
28	Beda-20230730-B4		1.45	78488.2			1			78488.2	16996.3	2023-07-31	09:07:42	2:D,4
29	Beda-20230730-B5		1.45	78208			1			78208	6545.64	2023-07-31	09:10:09	2:D,5
30	Beda-20230730-B6		1.45	73492			1			73492	5764.36	2023-07-31	09:12:34	2:D,6
31	Beda-20230730-B7		1.45	74747.9			1			74747.9	8238.66	2023-07-31	09:15:06	2:D,7
32	Beda-20230730-B8		1.45	71876.4			1			71876.4	18454.5	2023-07-31	09:17:31	2:D,8
33	Beda-20230730-B9		1.45	73599.1			1			73599.1	17809.4	2023-07-31	09:19:58	2:E,1
34	Beda-20230730-B10		1.45	73167.7			1			73167.7	7063.61	2023-07-31	09:22:31	2:E,2
35	Beda-20230730-B11		1.45	74011.6			1			74011.6	16719.1	2023-07-31	09:24:56	2:E,3
36	Beda-20230730-B12		1.45	74872.4			1			74872.4	21608.1	2023-07-31	09:27:23	2:E,4
37	Beda-20230730-B13		1.45	78411.7			1			78411.7	21687.7	2023-07-31	09:29:56	2:E,5
38	Beda-20230730-B14		1.45	82126.4			1			82126.4	32047.2	2023-07-31	09:32:22	2:E,6
39	Beda-20230730-B15		1.45	77914.8			1			77914.8	18240.6	2023-07-31	09:34:49	2:E,7
40	Beda-20230730-B16		1.45	77841.3			1			77841.3	8279.59	2023-07-31	09:37:22	2:E,8
41	Beda-20230730-B17		1.45	77579.7			1			77579.7	12427.5	2023-07-31	09:39:47	2:F,1
42	Beda-20230730-B18		1.45	79197.4			1			79197.4	13302.6	2023-07-31	09:42:15	2:F,2
43	Beda-20230730-B19		1.45	78039.9			1			78039.9	21408	2023-07-31	09:44:46	2:F,3
44	Beda-20230730-B20		1.45	76824.5			1			76824.5	21702	2023-07-31	09:47:12	2:F,4
45	Beda-20230730-B21		1.45	76959.9			1			76959.9	17033.2	2023-07-31	09:49:38	2:F,5
46	Beda-20230730-B22		1.45	72346.5			1			72346.5	6116.89	2023-07-31	09:52:05	2:F,6
47	Beda-20230730-B23		1.45	85626.7			1			85626.7	6081.99	2023-07-31	09:54:37	2:F,7
48	Beda-20230730-B24		1.45	80698.8			1			80698.8	12610.3	2023-07-31	09:57:06	2:F,8
Compound 2: M2
	Name	Sample Text	RT	Area	IS Area	Type	Std. Conc	Conc.	%Dev	Response	S/N	Acq.Date	Acq.Time	Vial	Coeff. Of Determination
1	Beda-20230730-A1		1.38	98.721	81745.2					0.001	65.698	2023-07-31	08:00:48	2:A,1
2	Beda-20230730-A2		1.38	96.997	83565.5					0.001	84.51	2023-07-31	08:03:14	2:A,2
3	Beda-20230730-A3		1.37	99.883	73582.7					0.001	15.806	2023-07-31	08:05:45	2:A,3
4	Beda-20230730-A4		1.37	146.604	75536.4					0.002	77.797	2023-07-31	08:08:11	2:A,4
5	Beda-20230730-A5		1.37	140.093	83686.5					0.002	74.342	2023-07-31	08:10:44	2:A,5
6	Beda-20230730-A6		1.37	129.151	75467.6					0.002	36.756	2023-07-31	08:13:11	2:A,6
7	Beda-20230730-A7		1.37	215.343	77769					0.003	194.772	2023-07-31	08:15:38	2:A,7
8	Beda-20230730-A8		1.37	216.806	79465.6					0.003	155.452	2023-07-31	08:18:10	2:A,8
9	Beda-20230730-A9		1.37	210.633	75193.8					0.003	94.791	2023-07-31	08:20:37	2:B,1
10	Beda-20230730-A10		1.37	397.541	72467.8					0.005	223.21	2023-07-31	08:23:04	2:B,2
11	Beda-20230730-A11		1.37	388.869	71812.8					0.005	279.156	2023-07-31	08:25:36	2:B,3
12	Beda-20230730-A12		1.37	406.868	73729.7					0.006	207.274	2023-07-31	08:28:03	2:B,4
13	Beda-20230730-A13		1.36	4793.13	68607.6					0.07	3282.73	2023-07-31	08:30:35	2:B,5
14	Beda-20230730-A14		1.37	4987.25	70458.3					0.071	3091.89	2023-07-31	08:33:01	2:B,6
15	Beda-20230730-A15		1.37	5292.15	75990.5					0.07	2060.72	2023-07-31	08:35:34	2:B,7
16	Beda-20230730-A16		1.37	16288.2	80389.7					0.203	6869.09	2023-07-31	08:37:59	2:B,8
17	Beda-20230730-A17		1.37	13037	68869.5					0.189	6756.89	2023-07-31	08:40:27	2:C,1
18	Beda-20230730-A18		1.37	13248.3	71856.5					0.184	7052.07	2023-07-31	08:42:58	2:C,2
19	Beda-20230730-A19		1.37	16526.5	72652					0.227	10669.7	2023-07-31	08:45:25	2:C,3
20	Beda-20230730-A20		1.37	17364.5	72607.2					0.239	6317.73	2023-07-31	08:47:58	2:C,4
21	Beda-20230730-A21		1.37	18100.9	71202.6					0.254	6036.47	2023-07-31	08:50:24	2:C,5
22	Beda-20230730-A22		1.37	23294.3	88043.4					0.265	8465.58	2023-07-31	08:52:51	2:C,6
23	Beda-20230730-A23		1.37	19110.9	74607					0.256	7660.43	2023-07-31	08:55:23	2:C,7
24	Beda-20230730-A24		1.37	19644	74122.5					0.265	6813.64	2023-07-31	08:57:49	2:C,8
25	Beda-20230730-B1		1.38	79.487	74307.9					0.001	45.485	2023-07-31	09:00:16	2:D,1
26	Beda-20230730-B2		1.37	42.705	73069.8					0.001	22.931	2023-07-31	09:02:43	2:D,2
27	Beda-20230730-B3		1.37	41.149	75063.9					0.001	18.043	2023-07-31	09:05:15	2:D,3
28	Beda-20230730-B4		1.37	47.844	78488.2					0.001	14.517	2023-07-31	09:07:42	2:D,4
29	Beda-20230730-B5		1.37	40.651	78208					0.001	30.109	2023-07-31	09:10:09	2:D,5
30	Beda-20230730-B6		1.38	42.215	73492					0.001	28.77	2023-07-31	09:12:34	2:D,6
31	Beda-20230730-B7		1.37	39.505	74747.9					0.001	27.982	2023-07-31	09:15:06	2:D,7
32	Beda-20230730-B8		1.36	43.164	71876.4					0.001	27.204	2023-07-31	09:17:31	2:D,8
33	Beda-20230730-B9		1.37	41.158	73599.1					0.001	21.757	2023-07-31	09:19:58	2:E,1
34	Beda-20230730-B10		1.37	66.166	73167.7					0.001	48.092	2023-07-31	09:22:31	2:E,2
35	Beda-20230730-B11		1.38	78.712	74011.6					0.001	49.13	2023-07-31	09:24:56	2:E,3
36	Beda-20230730-B12		1.37	87.974	74872.4					0.001	22.206	2023-07-31	09:27:23	2:E,4
37	Beda-20230730-B13		1.37	528.75	78411.7					0.007	258.542	2023-07-31	09:29:56	2:E,5
38	Beda-20230730-B14		1.37	546.751	82126.4					0.007	311.781	2023-07-31	09:32:22	2:E,6
39	Beda-20230730-B15		1.37	463.431	77914.8					0.006	186.522	2023-07-31	09:34:49	2:E,7
40	Beda-20230730-B16		1.37	6199.66	77841.3					0.08	2520.41	2023-07-31	09:37:22	2:E,8
41	Beda-20230730-B17		1.37	5914.19	77579.7					0.076	4591	2023-07-31	09:39:47	2:F,1
42	Beda-20230730-B18		1.37	5801.02	79197.4					0.073	5865.82	2023-07-31	09:42:15	2:F,2
43	Beda-20230730-B19		1.37	15182.9	78039.9					0.195	3578.48	2023-07-31	09:44:46	2:F,3
44	Beda-20230730-B20		1.37	14915.4	76824.5					0.194	9399.6	2023-07-31	09:47:12	2:F,4
45	Beda-20230730-B21		1.37	14900.4	76959.9					0.194	6503.68	2023-07-31	09:49:38	2:F,5
46	Beda-20230730-B22		1.37	16781.5	72346.5					0.232	4038.17	2023-07-31	09:52:05	2:F,6
47	Beda-20230730-B23		1.37	18399.6	85626.7					0.215	5221.01	2023-07-31	09:54:37	2:F,7
48	Beda-20230730-B24		1.37	15971.7	80698.8					0.198	10078.3	2023-07-31	09:57:06	2:F,8
