# Supplementary material for: Inhibitory effect of carvedilol on bedaquiline metabolism in vitro and in vivo
Source: PeerJ journal article supplement (doi:10.7717/peerj.19313), 2025-04-30
Supplement: Data.zip [file Fig.5-3A4.xlsx]

## Sheet: Sheet1
Quantify Compound Summary Report
Printed Mon Jul 03 20:07:39 2023
Compound 1: Diazepam
	Name	Sample Text	RT	Area	IS Area	Type	Std. Conc	Conc.	%Dev	Response	S/N	Acq.Date	Acq.Time	Vial
1	Beda-20230702-S1		1.45	100305		Standard	1	1.00368	0.4	100305	13448.8	2023-07-03	08:03:52	2:A,1
2	Beda-20230702-S2		1.45	91567.2		Standard	1	0.91625	-8.4	91567.2	9643.88	2023-07-03	08:06:19	2:A,2
3	Beda-20230702-S3		1.45	93522.6		Standard	1	0.93581	-6.4	93522.6	16663.7	2023-07-03	08:08:51	2:A,3
4	Beda-20230702-S4		1.45	98637.6		Standard	1	0.987	-1.3	98637.6	14855.9	2023-07-03	08:11:18	2:A,4
5	Beda-20230702-S5		1.45	111432		Standard	1	1.11502	11.5	111432	21203.8	2023-07-03	08:13:46	2:A,5
6	Beda-20230702-S6		1.45	104159		Standard	1	1.04225	4.2	104159	17972.1	2023-07-03	08:16:18	2:A,6
7	Beda-20230702-Meoh-3		1.44	109.226			1	0.00109	-99.9	109.226	13.99	2023-07-03	08:18:45	1:F,8
8	Beda-20230702-Meoh-4		1.45	40.568			1	0.00041	-100	40.568	6.262	2023-07-03	08:21:17	1:F,8
9	Beda-20230702-A1		1.45	112720			1	1.12791	12.8	112720	23085.1	2023-07-03	08:23:44	2:B,1
10	Beda-20230702-A2		1.45	98391.8			1	0.98454	-1.5	98391.8	13958.2	2023-07-03	08:26:10	2:B,2
11	Beda-20230702-A3		1.45	89001.1			1	0.89057	-10.9	89001.1	20520.3	2023-07-03	08:28:44	2:B,3
12	Beda-20230702-A4		1.45	93313.9			1	0.93373	-6.6	93313.9	19144.2	2023-07-03	08:31:10	2:B,4
13	Beda-20230702-A5		1.45	94605.8			1	0.94665	-5.3	94605.8	13015.3	2023-07-03	08:33:36	2:B,5
14	Beda-20230702-A6		1.45	96080.8			1	0.96141	-3.9	96080.8	15081.1	2023-07-03	08:36:08	2:B,6
15	Beda-20230702-A7		1.45	100952			1	1.01015	1	100952	16543.1	2023-07-03	08:38:43	2:B,7
16	Beda-20230702-A8		1.45	97429.5			1	0.97491	-2.5	97429.5	10826.2	2023-07-03	08:41:09	2:B,8
17	Beda-20230702-A9		1.45	94572.6			1	0.94632	-5.4	94572.6	19130.6	2023-07-03	08:43:35	2:C,1
18	Beda-20230702-A10		1.45	95055.9			1	0.95116	-4.9	95055.9	12248.6	2023-07-03	08:46:08	2:C,2
19	Beda-20230702-A11		1.45	95810.9			1	0.95871	-4.1	95810.9	12269.3	2023-07-03	08:48:34	2:C,3
20	Beda-20230702-A12		1.45	95841.2			1	0.95901	-4.1	95841.2	19552.3	2023-07-03	08:51:01	2:C,4
21	Beda-20230702-B1		1.45	91399.5			1	0.91457	-8.5	91399.5	9912.58	2023-07-03	08:53:34	2:C,5
22	Beda-20230702-B2		1.45	94829.2			1	0.94889	-5.1	94829.2	13536.1	2023-07-03	08:56:01	2:C,6
23	Beda-20230702-B3		1.45	95893.9			1	0.95954	-4	95893.9	17721.5	2023-07-03	08:58:33	2:C,7
24	Beda-20230702-B4		1.45	93850.2			1	0.93909	-6.1	93850.2	22794.4	2023-07-03	09:01:00	2:C,8
25	Beda-20230702-B5		1.45	94315.4			1	0.94375	-5.6	94315.4	21965.8	2023-07-03	09:03:32	2:D,1
26	Beda-20230702-B6		1.45	93403.1			1	0.93462	-6.5	93403.1	22973.5	2023-07-03	09:05:58	2:D,2
27	Beda-20230702-B7		1.45	94239.2			1	0.94298	-5.7	94239.2	18589.8	2023-07-03	09:08:31	2:D,3
28	Beda-20230702-B8		1.45	93871.8			1	0.93931	-6.1	93871.8	14971	2023-07-03	09:10:57	2:D,4
29	Beda-20230702-B9		1.45	97757.4			1	0.97819	-2.2	97757.4	22381.8	2023-07-03	09:13:24	2:D,5
30	Beda-20230702-B10		1.45	98167.7			1	0.98229	-1.8	98167.7	18868.3	2023-07-03	09:15:56	2:D,6
31	Beda-20230702-B11		1.45	91559.1			1	0.91617	-8.4	91559.1	13982.9	2023-07-03	09:18:22	2:D,7
32	Beda-20230702-B12		1.45	92021.2			1	0.92079	-7.9	92021.2	13284.8	2023-07-03	09:20:49	2:D,8
33	Beda-20230702-C1		1.45	86440.4			1	0.86495	-13.5	86440.4	22918.3	2023-07-03	09:23:20	2:E,1
34	Beda-20230702-C2		1.45	88455.8			1	0.88511	-11.5	88455.8	22369.5	2023-07-03	09:25:48	2:E,2
35	Beda-20230702-C3		1.45	88384.1			1	0.8844	-11.6	88384.1	19277.5	2023-07-03	09:28:19	2:E,3
36	Beda-20230702-C4		1.45	87023.5			1	0.87078	-12.9	87023.5	7836.72	2023-07-03	09:30:46	2:E,4
37	Beda-20230702-C5		1.45	93108.8			1	0.93167	-6.8	93108.8	17535.5	2023-07-03	09:33:19	2:E,5
38	Beda-20230702-C6		1.45	92734.2			1	0.92792	-7.2	92734.2	15307.2	2023-07-03	09:35:45	2:E,6
39	Beda-20230702-C7		1.45	92679.6			1	0.92738	-7.3	92679.6	17255	2023-07-03	09:38:11	2:E,7
40	Beda-20230702-C8		1.45	90019.1			1	0.90076	-9.9	90019.1	21053.1	2023-07-03	09:40:38	2:E,8
41	Beda-20230702-C9		1.45	91378.8			1	0.91436	-8.6	91378.8	24514.1	2023-07-03	09:43:05	2:F,1
42	Beda-20230702-C10		1.45	97054.2			1	0.97115	-2.9	97054.2	17194.5	2023-07-03	09:45:36	2:F,2
43	Beda-20230702-C11		1.45	93207.6			1	0.93266	-6.7	93207.6	22178.4	2023-07-03	09:48:01	2:F,3
44	Beda-20230702-C12		1.45	90575.4			1	0.90632	-9.4	90575.4	22194.5	2023-07-03	09:50:28	2:F,4
45	Beda-20230702-D1		1.45	91507.4			1	0.91565	-8.4	91507.4	16950.2	2023-07-03	09:53:00	2:F,5
46	Beda-20230702-D2		1.45	87895.7			1	0.87951	-12	87895.7	20485.9	2023-07-03	09:55:26	2:F,6
47	Beda-20230702-D3		1.45	89807.9			1	0.89864	-10.1	89807.9	17493.2	2023-07-03	09:57:54	2:F,7
48	Beda-20230702-D4		1.45	87947			1	0.88002	-12	87947	11894.5	2023-07-03	10:00:26	2:F,8
49	Beda-20230702-D5		1.45	93809.5			1	0.93868	-6.1	93809.5	24366.9	2023-07-03	10:02:52	1:A,1
50	Beda-20230702-D6		1.45	89156.8			1	0.89213	-10.8	89156.8	14913.8	2023-07-03	10:05:25	1:A,2
51	Beda-20230702-D7		1.45	90965.7			1	0.91023	-9	90965.7	15146.5	2023-07-03	10:07:51	1:A,3
52	Beda-20230702-D8		1.45	97980.3			1	0.98042	-2	97980.3	16312.3	2023-07-03	10:10:17	1:A,4
53	Beda-20230702-D9		1.45	90241.5			1	0.90298	-9.7	90241.5	16352.6	2023-07-03	10:12:50	1:A,5
54	Beda-20230702-D10		1.45	90353.8			1	0.90411	-9.6	90353.8	16676.5	2023-07-03	10:15:23	1:A,6
55	Beda-20230702-D11		1.45	91606.2			1	0.91664	-8.3	91606.2	22114.6	2023-07-03	10:17:50	1:A,7
56	Beda-20230702-D12		1.45	93691.4			1	0.9375	-6.2	93691.4	21059.4	2023-07-03	10:20:22	1:A,8
57	Beda-20230702-E1		1.44	88624.1			1	0.8868	-11.3	88624.1	27317.3	2023-07-03	10:22:49	1:B,1
58	Beda-20230702-E2		1.45	90205.9			1	0.90263	-9.7	90205.9	24967.1	2023-07-03	10:25:21	1:B,2
59	Beda-20230702-E3		1.45	90054			1	0.90111	-9.9	90054	14996.6	2023-07-03	10:27:49	1:B,3
60	Beda-20230702-E4		1.45	94839.9			1	0.94899	-5.1	94839.9	26266.2	2023-07-03	10:30:21	1:B,4
61	Beda-20230702-E5		1.45	87543.6			1	0.87599	-12.4	87543.6	17808.1	2023-07-03	10:32:49	1:B,5
62	Beda-20230702-E6		1.44	90161			1	0.90218	-9.8	90161	17120.7	2023-07-03	10:35:22	1:B,6
63	Beda-20230702-E7		1.44	89136.8			1	0.89193	-10.8	89136.8	28712.1	2023-07-03	10:37:49	1:B,7
64	Beda-20230702-E8		1.45	108374			1	1.08442	8.4	108374	21144.1	2023-07-03	10:40:20	1:B,8
65	Beda-20230702-E9		1.44	89261.7			1	0.89318	-10.7	89261.7	22888.2	2023-07-03	10:42:48	1:C,1
66	Beda-20230702-E10		1.45	90624.8			1	0.90682	-9.3	90624.8	21898.8	2023-07-03	10:45:19	1:C,2
67	Beda-20230702-E11		1.45	93049.2			1	0.93108	-6.9	93049.2	16910	2023-07-03	10:47:53	1:C,3
68	Beda-20230702-E12		1.45	107303			1	1.0737	7.4	107303	16665.3	2023-07-03	10:50:21	1:C,4
Compound 2: M2
	Name	Sample Text	RT	Area	IS Area	Type	Std. Conc	Conc.	%Dev	Response	S/N	Acq.Date	Acq.Time	Vial
1	Beda-20230702-S1		1.37	1900.02	100305	Standard	0.001	0.00107	6.7	0.019	1688.59	2023-07-03	08:03:52	2:A,1
2	Beda-20230702-S2		1.37	8484.24	91567.2	Standard	0.005	0.00479	-4.2	0.093	6421.3	2023-07-03	08:06:19	2:A,2
3	Beda-20230702-S3		1.36	17944.6	93522.6	Standard	0.01	0.0098	-2	0.192	10307.8	2023-07-03	08:08:51	2:A,3
4	Beda-20230702-S4		1.37	38419.8	98637.6	Standard	0.02	0.01978	-1.1	0.39	24834.7	2023-07-03	08:11:18	2:A,4
5	Beda-20230702-S5		1.37	5660.93	111432	Standard	0.05	0.00268	-94.6	0.051	9122.94	2023-07-03	08:13:46	2:A,5
6	Beda-20230702-S6		1.37	207128	104159	Standard	0.1	0.10056	0.6	1.989	99731.3	2023-07-03	08:16:18	2:A,6
7	Beda-20230702-Meoh-3		1.37	363.761	109.226			0.16833		3.33	177.012	2023-07-03	08:18:45	1:F,8
8	Beda-20230702-Meoh-4		1.37	89.09	40.568			0.11104		2.196	38.792	2023-07-03	08:21:17	1:F,8
9	Beda-20230702-A1		1.37	4839.12	112720			0.00228		0.043	2783.66	2023-07-03	08:23:44	2:B,1
10	Beda-20230702-A2		1.37	6485.15	98391.8			0.00344		0.066	3792.55	2023-07-03	08:26:10	2:B,2
11	Beda-20230702-A3		1.37	7586.27	89001.1			0.00442		0.085	5122.05	2023-07-03	08:28:44	2:B,3
12	Beda-20230702-A4		1.37	8598.89	93313.9			0.00476		0.092	5383.7	2023-07-03	08:31:10	2:B,4
13	Beda-20230702-A5		1.36	7562.62	94605.8			0.00415		0.08	4779.92	2023-07-03	08:33:36	2:B,5
14	Beda-20230702-A6		1.37	6955.29	96080.8			0.00377		0.072	5003.48	2023-07-03	08:36:08	2:B,6
15	Beda-20230702-A7		1.36	31628.2	100952			0.01594		0.313	13565.1	2023-07-03	08:38:43	2:B,7
16	Beda-20230702-A8		1.37	21184.2	97429.5			0.01109		0.217	6517.79	2023-07-03	08:41:09	2:B,8
17	Beda-20230702-A9		1.37	10248.7	94572.6			0.00558		0.108	4402.39	2023-07-03	08:43:35	2:C,1
18	Beda-20230702-A10		1.37	35835.4	95055.9			0.01915		0.377	5738.25	2023-07-03	08:46:08	2:C,2
19	Beda-20230702-A11		1.37	36413	95810.9			0.01931		0.38	14387.2	2023-07-03	08:48:34	2:C,3
20	Beda-20230702-A12		1.37	38084.1	95841.2			0.02018		0.397	18460.9	2023-07-03	08:51:01	2:C,4
21	Beda-20230702-B1		1.37	2945.1	91399.5			0.00174		0.032	638.233	2023-07-03	08:53:34	2:C,5
22	Beda-20230702-B2		1.37	2836.78	94829.2			0.00162		0.03	1183.23	2023-07-03	08:56:01	2:C,6
23	Beda-20230702-B3		1.36	2450.14	95893.9			0.0014		0.026	1085.46	2023-07-03	08:58:33	2:C,7
24	Beda-20230702-B4		1.36	13732.5	93850.2			0.0075		0.146	17419.9	2023-07-03	09:01:00	2:C,8
25	Beda-20230702-B5		1.37	12717.5	94315.4			0.00692		0.135	5375.13	2023-07-03	09:03:32	2:D,1
26	Beda-20230702-B6		1.37	12517.2	93403.1			0.00688		0.134	3250.4	2023-07-03	09:05:58	2:D,2
27	Beda-20230702-B7		1.36	27503.8	94239.2			0.01485		0.292	13870.1	2023-07-03	09:08:31	2:D,3
28	Beda-20230702-B8		1.37	27443.8	93871.8			0.01488		0.292	11176.3	2023-07-03	09:10:57	2:D,4
29	Beda-20230702-B9		1.36	28498	97757.4			0.01484		0.292	13973	2023-07-03	09:13:24	2:D,5
30	Beda-20230702-B10		1.36	28963.7	98167.7			0.01501		0.295	16974.2	2023-07-03	09:15:56	2:D,6
31	Beda-20230702-B11		1.36	19544.2	91559.1			0.01089		0.213	7023.79	2023-07-03	09:18:22	2:D,7
32	Beda-20230702-B12		1.37	10778.2	92021.2			0.00603		0.117	6481.51	2023-07-03	09:20:49	2:D,8
33	Beda-20230702-C1		1.36	5410.69	86440.4			0.00327		0.063	4122.44	2023-07-03	09:23:20	2:E,1
34	Beda-20230702-C2		1.36	5611.19	88455.8			0.00331		0.063	3300.47	2023-07-03	09:25:48	2:E,2
35	Beda-20230702-C3		1.37	5457.43	88384.1			0.00323		0.062	3836.85	2023-07-03	09:28:19	2:E,3
36	Beda-20230702-C4		1.36	10855.1	87023.5			0.00641		0.125	6012.54	2023-07-03	09:30:46	2:E,4
37	Beda-20230702-C5		1.36	11476.4	93108.8			0.00634		0.123	5372.44	2023-07-03	09:33:19	2:E,5
38	Beda-20230702-C6		1.36	11006.2	92734.2			0.00611		0.119	4247.62	2023-07-03	09:35:45	2:E,6
39	Beda-20230702-C7		1.37	20645	92679.6			0.01136		0.223	12375.2	2023-07-03	09:38:11	2:E,7
40	Beda-20230702-C8		1.36	18498.3	90019.1			0.01049		0.205	9196.36	2023-07-03	09:40:38	2:E,8
41	Beda-20230702-C9		1.36	17117.4	91378.8			0.00957		0.187	9521.36	2023-07-03	09:43:05	2:F,1
42	Beda-20230702-C10		1.36	29041.8	97054.2			0.01522		0.299	18598.4	2023-07-03	09:45:36	2:F,2
43	Beda-20230702-C11		1.37	22215.8	93207.6			0.01215		0.238	9909.02	2023-07-03	09:48:01	2:F,3
44	Beda-20230702-C12		1.36	16114.8	90575.4			0.0091		0.178	16082.3	2023-07-03	09:50:28	2:F,4
45	Beda-20230702-D1		1.37	2596.76	91507.4			0.00154		0.028	1056.9	2023-07-03	09:53:00	2:F,5
46	Beda-20230702-D2		1.37	2972.51	87895.7			0.00182		0.034	1764.09	2023-07-03	09:55:26	2:F,6
47	Beda-20230702-D3		1.37	3566.23	89807.9			0.00212		0.04	1690.67	2023-07-03	09:57:54	2:F,7
48	Beda-20230702-D4		1.36	6435.72	87947			0.00381		0.073	2540.2	2023-07-03	10:00:26	2:F,8
49	Beda-20230702-D5		1.37	5111.05	93809.5			0.00286		0.054	2465.35	2023-07-03	10:02:52	1:A,1
50	Beda-20230702-D6		1.37	3123.12	89156.8			0.00188		0.035	1387.86	2023-07-03	10:05:25	1:A,2
51	Beda-20230702-D7		1.37	7844.08	90965.7			0.00447		0.086	3647.55	2023-07-03	10:07:51	1:A,3
52	Beda-20230702-D8		1.37	8206.49	97980.3			0.00434		0.084	3935.11	2023-07-03	10:10:17	1:A,4
53	Beda-20230702-D9		1.37	7108.91	90241.5			0.00409		0.079	5588.67	2023-07-03	10:12:50	1:A,5
54	Beda-20230702-D10		1.37	8003.93	90353.8			0.00458		0.089	1518.37	2023-07-03	10:15:23	1:A,6
55	Beda-20230702-D11		1.37	8525.17	91606.2			0.00481		0.093	3721.98	2023-07-03	10:17:50	1:A,7
56	Beda-20230702-D12		1.37	9224.3	93691.4			0.00508		0.098	8131.77	2023-07-03	10:20:22	1:A,8
57	Beda-20230702-E1		1.36	1276.81	88624.1			0.00084		0.014	732.29	2023-07-03	10:22:49	1:B,1
58	Beda-20230702-E2		1.36	1266.64	90205.9			0.00082		0.014	927.755	2023-07-03	10:25:21	1:B,2
59	Beda-20230702-E3		1.37	1225.48	90054			0.0008		0.014	450.765	2023-07-03	10:27:49	1:B,3
60	Beda-20230702-E4		1.36	2979.48	94839.9			0.0017		0.031	1423.19	2023-07-03	10:30:21	1:B,4
61	Beda-20230702-E5		1.37	2518.66	87543.6			0.00156		0.029	942.861	2023-07-03	10:32:49	1:B,5
62	Beda-20230702-E6		1.36	2280.31	90161			0.00139		0.025	830.957	2023-07-03	10:35:22	1:B,6
63	Beda-20230702-E7		1.37	4924.92	89136.8			0.0029		0.055	1888.78	2023-07-03	10:37:49	1:B,7
64	Beda-20230702-E8		1.36	4817.31	108374			0.00236		0.044	2384.13	2023-07-03	10:40:20	1:B,8
65	Beda-20230702-E9		1.36	2922.23	89261.7			0.00176		0.033	1056.8	2023-07-03	10:42:48	1:C,1
66	Beda-20230702-E10		1.36	5758.65	90624.8			0.00332		0.064	4755.56	2023-07-03	10:45:19	1:C,2
67	Beda-20230702-E11		1.36	5189.57	93049.2			0.00293		0.056	2345.45	2023-07-03	10:47:53	1:C,3
68	Beda-20230702-E12		1.37	5408.61	107303			0.00266		0.05	2723.53	2023-07-03	10:50:21	1:C,4
