# Supplementary material for: Inhibitory effect of carvedilol on bedaquiline metabolism in vitro and in vivo
Source: PeerJ journal article supplement (doi:10.7717/peerj.19313), 2025-04-30
Supplement: Data.zip [file Fig.5-HLM.xlsx]

## Sheet: Data-external standard method
Quantify Compound Summary Report
Printed Fri May 12 18:44:23 2023
Compound 1: M2
	Name	Sample Text	RT	Area	IS Area	Type	Std. Conc	Conc.	%Dev	Response	S/N	Acq.Date	Acq.Time	Vial
1	Beda-20230507-A1		1.37	45515.4				0.0307		45515.4	8648.76	2023-05-08	08:42:52	2:B,1
2	Beda-20230507-A2		1.38	40093.4				0.02682		40093.4	9227.93	2023-05-08	08:45:18	2:B,2
3	Beda-20230507-A3		1.38	36619.4				0.02433		36619.4	20870.2	2023-05-08	08:47:45	2:B,3
4	Beda-20230507-A4		1.38	35302.2				0.02339		35302.2	28022.1	2023-05-08	08:50:17	2:B,4
5	Beda-20230507-A5		1.38	51985.5				0.03533		51985.5	17070.6	2023-05-08	08:52:51	2:B,5
6	Beda-20230507-A6		1.37	63942.6				0.04388		63942.6	27032.7	2023-05-08	08:55:18	2:B,6
7	Beda-20230507-A7		1.37	35025				0.02319		35025	8456.33	2023-05-08	08:57:49	2:B,7
8	Beda-20230507-A8		1.37	40767.4				0.0273		40767.4	16070.5	2023-05-08	09:00:23	2:B,8
9	Beda-20230507-A9		1.38	35136.8				0.02327		35136.8	7607.39	2023-05-08	09:02:49	2:C,1
10	Beda-20230507-A10		1.37	44346.9				0.02986		44346.9	13146.6	2023-05-08	09:05:16	2:C,2
11	Beda-20230507-A11		1.37	41683.8				0.02796		41683.8	12547.8	2023-05-08	09:07:48	2:C,3
12	Beda-20230507-A12		1.37	37969.1				0.0253		37969.1	15278.9	2023-05-08	09:10:15	2:C,4
13	Beda-20230507-B1		1.38	29180				0.01901		29180	9918.16	2023-05-08	09:12:47	2:C,5
14	Beda-20230507-B2		1.38	31131.5				0.0204		31131.5	9417.31	2023-05-08	09:15:13	2:C,6
15	Beda-20230507-B3		1.38	33110.9				0.02182		33110.9	10418.9	2023-05-08	09:17:41	2:C,7
16	Beda-20230507-B4		1.38	25287.3				0.01622		25287.3	7261.2	2023-05-08	09:20:12	2:C,8
17	Beda-20230507-B5		1.38	33242.9				0.02192		33242.9	10159.4	2023-05-08	09:22:38	2:D,1
18	Beda-20230507-B6		1.38	39903.6				0.02668		39903.6	25574.7	2023-05-08	09:25:04	2:D,2
19	Beda-20230507-B7		1.37	56199.3				0.03834		56199.3	9706.66	2023-05-08	09:27:31	2:D,3
20	Beda-20230507-B8		1.37	39528.3				0.02641		39528.3	9091.73	2023-05-08	09:30:02	2:D,4
21	Beda-20230507-B9		1.37	23546.7				0.01498		23546.7	7555.89	2023-05-08	09:32:28	2:D,5
22	Beda-20230507-B10		1.37	34257.5				0.02264		34257.5	18677.3	2023-05-08	09:34:55	2:D,6
23	Beda-20230507-B11		1.37	32376				0.0213		32376	4970.33	2023-05-08	09:37:21	2:D,7
24	Beda-20230507-B12		1.37	29914.3				0.01953		29914.3	7790.1	2023-05-08	09:39:53	2:D,8
25	Beda-20230507-C1		1.37	23689.8				0.01508		23689.8	8219.2	2023-05-08	09:42:18	2:E,1
26	Beda-20230507-C2		1.38	22442				0.01419		22442	12292.6	2023-05-08	09:44:46	2:E,2
27	Beda-20230507-C3		1.38	22190.4				0.01401		22190.4	6133.54	2023-05-08	09:47:18	2:E,3
28	Beda-20230507-C4		1.37	18165.6				0.01113		18165.6	4811.61	2023-05-08	09:49:44	2:E,4
29	Beda-20230507-C5		1.37	20485.8				0.01279		20485.8	8491.89	2023-05-08	09:52:17	2:E,5
30	Beda-20230507-C6		1.37	22264.7				0.01406		22264.7	9730.5	2023-05-08	09:54:42	2:E,6
31	Beda-20230507-C7		1.37	22649.2				0.01434		22649.2	20332.8	2023-05-08	09:57:09	2:E,7
32	Beda-20230507-C8		1.37	25955.8				0.0167		25955.8	7080.85	2023-05-08	09:59:42	2:E,8
33	Beda-20230507-C9		1.37	28735				0.01869		28735	12901.2	2023-05-08	10:02:07	2:F,1
34	Beda-20230507-C10		1.37	24249.6				0.01548		24249.6	10830.7	2023-05-08	10:04:34	2:F,2
35	Beda-20230507-C11		1.37	25208.2				0.01617		25208.2	9220.81	2023-05-08	10:07:01	2:F,3
36	Beda-20230507-C12		1.37	27146.9				0.01755		27146.9	14334.4	2023-05-08	10:09:32	2:F,4
37	Beda-20230507-D1		1.38	12813.9				0.0073		12813.9	7482.94	2023-05-08	10:11:59	2:F,5
38	Beda-20230507-D2		1.37	19248.5				0.0119		19248.5	8537.74	2023-05-08	10:14:24	2:F,6
39	Beda-20230507-D3		1.37	25679.5				0.0165		25679.5	7274.42	2023-05-08	10:16:57	2:F,7
40	Beda-20230507-D4		1.37	26699.3				0.01723		26699.3	10037.9	2023-05-08	10:19:23	2:F,8
41	Beda-20230507-D5		1.37	25737.3				0.01654		25737.3	11810.3	2023-05-08	10:21:49	1:A,1
42	Beda-20230507-D6		1.37	23582.3				0.015		23582.3	8469.82	2023-05-08	10:24:16	1:A,2
43	Beda-20230507-D7		1.37	20130.2				0.01253		20130.2	6316.37	2023-05-08	10:26:48	1:A,3
44	Beda-20230507-D8		1.37	21157.5				0.01327		21157.5	7176.16	2023-05-08	10:29:21	1:A,4
45	Beda-20230507-D9		1.37	21485.7				0.0135		21485.7	5721.97	2023-05-08	10:31:55	1:A,5
46	Beda-20230507-D10		1.37	14771.1				0.0087		14771.1	6654.22	2023-05-08	10:34:22	1:A,6
47	Beda-20230507-D11		1.37	16947.5				0.01026		16947.5	6749.64	2023-05-08	10:36:54	1:A,7
48	Beda-20230507-D12		1.37	18648.7				0.01147		18648.7	7868.06	2023-05-08	10:39:21	1:A,8
49	Beda-20230507-E1		1.38	13582.3				0.00785		13582.3	3635.02	2023-05-08	10:41:53	1:B,1
50	Beda-20230507-E2		1.37	14994.8				0.00886		14994.8	6950.79	2023-05-08	10:44:21	1:B,2
51	Beda-20230507-E3		1.38	17206.3				0.01044		17206.3	3955.5	2023-05-08	10:46:54	1:B,3
52	Beda-20230507-E4		1.37	13470.5				0.00777		13470.5	6798	2023-05-08	10:49:27	1:B,4
53	Beda-20230507-E5		1.37	12104.7				0.00679		12104.7	5684.37	2023-05-08	10:51:54	1:B,5
54	Beda-20230507-E6		1.37	10765.6				0.00583		10765.6	5500.08	2023-05-08	10:54:26	1:B,6
55	Beda-20230507-E7		1.37	14171.6				0.00827		14171.6	3855.1	2023-05-08	10:56:53	1:B,7
56	Beda-20230507-E8		1.37	14185.7				0.00828		14185.7	5189.79	2023-05-08	10:59:20	1:B,8
57	Beda-20230507-E9		1.37	14395.4				0.00843		14395.4	4905.22	2023-05-08	11:01:53	1:C,1
58	Beda-20230507-E10		1.37	9996.71				0.00528		9996.71	6527.55	2023-05-08	11:04:21	1:C,2
59	Beda-20230507-E11		1.37	12760.3				0.00726		12760.3	7925.59	2023-05-08	11:06:52	1:C,3
60	Beda-20230507-E12		1.37	10630.9				0.00574		10630.9	4920.54	2023-05-08	11:09:26	1:C,4

## Sheet: Analyse-external standard metho
Quantify Compound Summary Report
Printed Fri May 12 18:44:23 2023
Compound 1: M2
	Name	Sample Text	RT	Area	IS Area	Type	Std. Conc	Conc.	%Dev	Response	S/N	Acq.Date	Acq.Time	Vial
1	Beda-20230507-A1		1.37	45515.4				0.0307		45515.4	8648.76	2023-05-08	08:42:52	2:B,1
2	Beda-20230507-A2		1.38	40093.4				0.02682		40093.4	9227.93	2023-05-08	08:45:18	2:B,2
3	Beda-20230507-A3		1.38	36619.4				0.02433		36619.4	20870.2	2023-05-08	08:47:45	2:B,3
4	Beda-20230507-A4		1.38	35302.2				0.02339		35302.2	28022.1	2023-05-08	08:50:17	2:B,4
5	Beda-20230507-A5		1.38	51985.5				0.03533		51985.5	17070.6	2023-05-08	08:52:51	2:B,5
6	Beda-20230507-A6		1.37	63942.6				0.04388		63942.6	27032.7	2023-05-08	08:55:18	2:B,6
7	Beda-20230507-A7		1.37	35025				0.02319		35025	8456.33	2023-05-08	08:57:49	2:B,7
8	Beda-20230507-A8		1.37	40767.4				0.0273		40767.4	16070.5	2023-05-08	09:00:23	2:B,8
9	Beda-20230507-A9		1.38	35136.8				0.02327		35136.8	7607.39	2023-05-08	09:02:49	2:C,1
10	Beda-20230507-A10		1.37	44346.9				0.02986		44346.9	13146.6	2023-05-08	09:05:16	2:C,2
11	Beda-20230507-A11		1.37	41683.8				0.02796		41683.8	12547.8	2023-05-08	09:07:48	2:C,3
12	Beda-20230507-A12		1.37	37969.1				0.0253		37969.1	15278.9	2023-05-08	09:10:15	2:C,4
13	Beda-20230507-B1		1.38	29180				0.01901		29180	9918.16	2023-05-08	09:12:47	2:C,5
14	Beda-20230507-B2		1.38	31131.5				0.0204		31131.5	9417.31	2023-05-08	09:15:13	2:C,6
15	Beda-20230507-B3		1.38	33110.9				0.02182		33110.9	10418.9	2023-05-08	09:17:41	2:C,7
16	Beda-20230507-B4		1.38	25287.3				0.01622		25287.3	7261.2	2023-05-08	09:20:12	2:C,8
17	Beda-20230507-B5		1.38	33242.9				0.02192		33242.9	10159.4	2023-05-08	09:22:38	2:D,1
18	Beda-20230507-B6		1.38	39903.6				0.02668		39903.6	25574.7	2023-05-08	09:25:04	2:D,2
19	Beda-20230507-B7		1.37	56199.3				0.03834		56199.3	9706.66	2023-05-08	09:27:31	2:D,3
20	Beda-20230507-B8		1.37	39528.3				0.02641		39528.3	9091.73	2023-05-08	09:30:02	2:D,4
21	Beda-20230507-B9		1.37	23546.7				0.01498		23546.7	7555.89	2023-05-08	09:32:28	2:D,5
22	Beda-20230507-B10		1.37	34257.5				0.02264		34257.5	18677.3	2023-05-08	09:34:55	2:D,6
23	Beda-20230507-B11		1.37	32376				0.0213		32376	4970.33	2023-05-08	09:37:21	2:D,7
24	Beda-20230507-B12		1.37	29914.3				0.01953		29914.3	7790.1	2023-05-08	09:39:53	2:D,8
25	Beda-20230507-C1		1.37	23689.8				0.01508		23689.8	8219.2	2023-05-08	09:42:18	2:E,1
26	Beda-20230507-C2		1.38	22442				0.01419		22442	12292.6	2023-05-08	09:44:46	2:E,2
27	Beda-20230507-C3		1.38	22190.4				0.01401		22190.4	6133.54	2023-05-08	09:47:18	2:E,3
28	Beda-20230507-C4		1.37	18165.6				0.01113		18165.6	4811.61	2023-05-08	09:49:44	2:E,4
29	Beda-20230507-C5		1.37	20485.8				0.01279		20485.8	8491.89	2023-05-08	09:52:17	2:E,5
30	Beda-20230507-C6		1.37	22264.7				0.01406		22264.7	9730.5	2023-05-08	09:54:42	2:E,6
31	Beda-20230507-C7		1.37	22649.2				0.01434		22649.2	20332.8	2023-05-08	09:57:09	2:E,7
32	Beda-20230507-C8		1.37	25955.8				0.0167		25955.8	7080.85	2023-05-08	09:59:42	2:E,8
33	Beda-20230507-C9		1.37	28735				0.01869		28735	12901.2	2023-05-08	10:02:07	2:F,1
34	Beda-20230507-C10		1.37	24249.6				0.01548		24249.6	10830.7	2023-05-08	10:04:34	2:F,2
35	Beda-20230507-C11		1.37	25208.2				0.01617		25208.2	9220.81	2023-05-08	10:07:01	2:F,3
36	Beda-20230507-C12		1.37	27146.9				0.01755		27146.9	14334.4	2023-05-08	10:09:32	2:F,4
37	Beda-20230507-D1		1.38	12813.9				0.0073		12813.9	7482.94	2023-05-08	10:11:59	2:F,5
38	Beda-20230507-D2		1.37	19248.5				0.0119		19248.5	8537.74	2023-05-08	10:14:24	2:F,6
39	Beda-20230507-D3		1.37	25679.5				0.0165		25679.5	7274.42	2023-05-08	10:16:57	2:F,7
40	Beda-20230507-D4		1.37	26699.3				0.01723		26699.3	10037.9	2023-05-08	10:19:23	2:F,8
41	Beda-20230507-D5		1.37	25737.3				0.01654		25737.3	11810.3	2023-05-08	10:21:49	1:A,1
42	Beda-20230507-D6		1.37	23582.3				0.015		23582.3	8469.82	2023-05-08	10:24:16	1:A,2
43	Beda-20230507-D7		1.37	20130.2				0.01253		20130.2	6316.37	2023-05-08	10:26:48	1:A,3
44	Beda-20230507-D8		1.37	21157.5				0.01327		21157.5	7176.16	2023-05-08	10:29:21	1:A,4
45	Beda-20230507-D9		1.37	21485.7				0.0135		21485.7	5721.97	2023-05-08	10:31:55	1:A,5
46	Beda-20230507-D10		1.37	14771.1				0.0087		14771.1	6654.22	2023-05-08	10:34:22	1:A,6
47	Beda-20230507-D11		1.37	16947.5				0.01026		16947.5	6749.64	2023-05-08	10:36:54	1:A,7
48	Beda-20230507-D12		1.37	18648.7				0.01147		18648.7	7868.06	2023-05-08	10:39:21	1:A,8
49	Beda-20230507-E1		1.38	13582.3				0.00785		13582.3	3635.02	2023-05-08	10:41:53	1:B,1
50	Beda-20230507-E2		1.37	14994.8				0.00886		14994.8	6950.79	2023-05-08	10:44:21	1:B,2
51	Beda-20230507-E3		1.38	17206.3				0.01044		17206.3	3955.5	2023-05-08	10:46:54	1:B,3
52	Beda-20230507-E4		1.37	13470.5				0.00777		13470.5	6798	2023-05-08	10:49:27	1:B,4
53	Beda-20230507-E5		1.37	12104.7				0.00679		12104.7	5684.37	2023-05-08	10:51:54	1:B,5
54	Beda-20230507-E6		1.37	10765.6				0.00583		10765.6	5500.08	2023-05-08	10:54:26	1:B,6
55	Beda-20230507-E7		1.37	14171.6				0.00827		14171.6	3855.1	2023-05-08	10:56:53	1:B,7
56	Beda-20230507-E8		1.37	14185.7				0.00828		14185.7	5189.79	2023-05-08	10:59:20	1:B,8
57	Beda-20230507-E9		1.37	14395.4				0.00843		14395.4	4905.22	2023-05-08	11:01:53	1:C,1
58	Beda-20230507-E10		1.37	9996.71				0.00528		9996.71	6527.55	2023-05-08	11:04:21	1:C,2
59	Beda-20230507-E11		1.37	12760.3				0.00726		12760.3	7925.59	2023-05-08	11:06:52	1:C,3
60	Beda-20230507-E12		1.37	10630.9				0.00574		10630.9	4920.54	2023-05-08	11:09:26	1:C,4
