# Supplementary material for: Inhibitory effect of carvedilol on bedaquiline metabolism in vitro and in vivo
Source: PeerJ journal article supplement (doi:10.7717/peerj.19313), 2025-04-30
Supplement: Data.zip [file Fig.5-RLM.xlsx]

## Sheet: data
Quantify Compound Summary Report
Printed Sun Nov 27 07:17:25 2022
Compound 1: Diazepam
	Name	Sample Text	RT	Area	IS Area	Type	Std. Conc	Conc.	%Dev	S/N	Acq.Date	Acq.Time	Vial	Response
1	Bedaquiline-20221125-1		1.44	37329			1	1.06999	7	2051	2022-11-25	15:45:13	1:A,7	37329.2
2	Bedaquiline-20221125-2		1.44	37700			1	1.08061	8.1	2004	2022-11-25	15:47:46	1:A,8	37699.6
3	Bedaquiline-20221125-3		1.44	38238			1	1.09604	9.6	2322	2022-11-25	15:50:13	1:B,1	38237.9
4	Bedaquiline-20221125-4		1.44	32942			1	0.94423	-5.6	2505	2022-11-25	15:52:45	1:B,2	32941.8
5	Bedaquiline-20221125-5		1.44	21086			1	0.60441	-39.6	1728	2022-11-25	15:55:13	1:B,3	21086.3
6	Bedaquiline-20221125-6		1.44	29263			1	0.83878	-16.1	1725	2022-11-25	15:57:47	1:B,4	29262.7
7	Bedaquiline-20221125-7		1.44	35436			1	1.01571	1.6	2009	2022-11-25	16:00:20	1:B,5	35435.5
8	Bedaquiline-20221125-8		1.44	35939			1	1.03015	3	2806	2022-11-25	16:02:47	1:B,6	35939.1
9	Bedaquiline-20221125-9		1.44	39404			1	1.12947	12.9	2346	2022-11-25	16:05:19	1:B,7	39404.1
10	Bedaquiline-20221125-10		1.44	37105			1	1.06356	6.4	2101	2022-11-25	16:07:46	1:B,8	37104.7
11	Bedaquiline-20221125-11		1.43	37538			1	1.07597	7.6	2589	2022-11-25	16:10:13	1:C,1	37537.6
12	Bedaquiline-20221125-12		1.44	28158			1	0.8071	-19.3	1740	2022-11-25	16:12:44	1:C,2	28157.7
13	Bedaquiline-20221125-13		1.44	22741			1	0.65183	-34.8	1432	2022-11-25	16:15:10	1:C,3	22740.6
14	Bedaquiline-20221125-14		1.44	30825			1	0.88356	-11.6	1928	2022-11-25	16:17:43	1:C,4	30825.1
15	Bedaquiline-20221125-15		1.44	34676			1	0.99395	-0.6	2041	2022-11-25	16:20:11	1:C,5	34676.2
16	Bedaquiline-20221125-16		1.44	37484			1	1.07444	7.4	1750	2022-11-25	16:22:37	1:C,6	37484.4
17	Bedaquiline-20221125-17		1.44	37344			1	1.07042	7	2098	2022-11-25	16:25:07	1:C,7	37344.3
18	Bedaquiline-20221125-18		1.44	38599			1	1.1064	10.6	3205	2022-11-25	16:27:34	1:C,8	38599.5
19	Bedaquiline-20221125-A1		1.44	26037			1	0.74631	-25.4	1789	2022-11-25	16:30:07	1:D,1	26036.9
20	Bedaquiline-20221125-A2		1.44	21461			1	0.61515	-38.5	1615	2022-11-25	16:32:34	1:D,2	21460.9
21	Bedaquiline-20221125-A3		1.44	30342			1	0.8697	-13	2618	2022-11-25	16:35:06	1:D,3	30341.7
22	Bedaquiline-20221125-A4		1.44	34557			1	0.99052	-0.9	2126	2022-11-25	16:37:33	1:D,4	34556.5
23	Bedaquiline-20221125-A5		1.43	36049			1	1.03329	3.3	2120	2022-11-25	16:40:05	1:D,5	36048.7
24	Bedaquiline-20221125-A6		1.44	24763			1	0.7098	-29	2217	2022-11-25	16:42:32	1:D,6	24763
25	Bedaquiline-20221125-A7		1.44	25948			1	0.74377	-25.6	3111	2022-11-25	16:45:04	1:D,7	25948.2
26	Bedaquiline-20221125-A8		1.43	32064			1	0.91906	-8.1	2829	2022-11-25	16:47:32	1:D,8	32063.6
27	Bedaquiline-20221125-A9		1.44	36408			1	1.0436	4.4	2611	2022-11-25	16:49:59	1:E,1	36408.4
28	Bedaquiline-20221125-A10		1.44	38647			1	1.10778	10.8	2764	2022-11-25	16:52:30	1:E,2	38647.5
29	Bedaquiline-20221125-A11		1.44	39497			1	1.13212	13.2	2783	2022-11-25	16:54:57	1:E,3	39496.8
30	Bedaquiline-20221125-A12		1.44	29042			1	0.83246	-16.8	2035	2022-11-25	16:57:24	1:E,4	29042.2
31	Bedaquiline-20221125-B1		1.44	23677			1	0.67868	-32.1	2226	2022-11-25	16:59:55	1:E,5	23677.3
32	Bedaquiline-20221125-B2		1.43	31041			1	0.88975	-11	1729	2022-11-25	17:02:22	1:E,6	31041.2
33	Bedaquiline-20221125-B3		1.44	35744			1	1.02455	2.5	1959	2022-11-25	17:04:48	1:E,7	35744
34	Bedaquiline-20221125-B4		1.44	39213			1	1.12398	12.4	2114	2022-11-25	17:07:20	1:E,8	39212.6
35	Bedaquiline-20221125-B5		1.44	41166			1	1.17996	18	3074	2022-11-25	17:09:50	1:F,1	41165.6
36	Bedaquiline-20221125-B6		1.44	40345			1	1.15644	15.6	2831	2022-11-25	17:12:22	1:F,2	40345.2
37	Bedaquiline-20221125-B7		1.44	29204			1	0.83708	-16.3	2313	2022-11-25	17:14:50	1:F,3	29203.7
38	Bedaquiline-20221125-B8		1.43	20895			1	0.59893	-40.1	1542	2022-11-25	17:17:22	1:F,4	20894.9
39	Bedaquiline-20221125-B9		1.43	28746			1	0.82398	-17.6	2765	2022-11-25	17:19:49	1:F,5	28746.4
40	Bedaquiline-20221125-B10		1.43	30748			1	0.88134	-11.9	2152	2022-11-25	17:22:23	1:F,6	30747.8
41	Bedaquiline-20221125-B11		1.43	19288			1	0.55285	-44.7	1133	2022-11-25	17:24:50	1:F,7	19287.6
42	Bedaquiline-20221125-B12		1.43	24001			1	0.68795	-31.2	1375	2022-11-25	17:27:24	2:A,1	24000.8
43	Bedaquiline-20221125-C1		1.43	29159			1	0.83579	-16.4	1950	2022-11-25	17:29:51	2:A,2	29158.7
44	Bedaquiline-20221125-C2		1.43	27369			1	0.78449	-21.6	2212	2022-11-25	17:32:22	2:A,3	27368.8
45	Bedaquiline-20221125-C3		1.44	18234			1	0.52265	-47.7	1156	2022-11-25	17:34:48	2:A,4	18233.9
46	Bedaquiline-20221125-C4		1.44	25683			1	0.73617	-26.4	1238	2022-11-25	17:37:15	2:A,5	25682.9
47	Bedaquiline-20221125-C5		1.44	33631			1	0.96399	-3.6	1598	2022-11-25	17:39:47	2:A,6	33631.1
48	Bedaquiline-20221125-C6		1.43	23005			1	0.6594	-34.1	1694	2022-11-25	17:42:13	2:A,7	23004.6
49	Bedaquiline-20221125-C7		1.43	23232			1	0.66591	-33.4	2062	2022-11-25	17:44:39	2:A,8	23231.9
50	Bedaquiline-20221125-C8		1.44	31142			1	0.89263	-10.7	2397	2022-11-25	17:47:05	2:B,1	31141.6
51	Bedaquiline-20221125-C9		1.43	34198			1	0.98024	-2	1564	2022-11-25	17:49:32	2:B,2	34197.9
52	Bedaquiline-20221125-C10		1.44	23894			1	0.68488	-31.5	1942	2022-11-25	17:52:03	2:B,3	23893.6
53	Bedaquiline-20221125-C11		1.43	26010			1	0.74555	-25.4	1729	2022-11-25	17:54:30	2:B,4	26010.1
54	Bedaquiline-20221125-C12		1.43	33076			1	0.94807	-5.2	3412	2022-11-25	17:57:03	2:B,5	33075.6
55	Bedaquiline-20221125-D1		1.43	32425			1	0.92942	-7.1	2786	2022-11-25	17:59:29	2:B,6	32425.1
56	Bedaquiline-20221125-D2		1.43	20612			1	0.59083	-40.9	1135	2022-11-25	18:02:03	2:B,7	20612.5
57	Bedaquiline-20221125-D3		1.43	26052			1	0.74675	-25.3	1366	2022-11-25	18:04:29	2:B,8	26052.2
58	Bedaquiline-20221125-D4		1.43	33345			1	0.95579	-4.4	2234	2022-11-25	18:07:02	2:C,1	33345.1
59	Bedaquiline-20221125-D5		1.43	27708			1	0.79422	-20.6	1592	2022-11-25	18:09:36	2:C,2	27708.3
60	Bedaquiline-20221125-D6		1.43	17790			1	0.50994	-49	1360	2022-11-25	18:12:02	2:C,3	17790.3
61	Bedaquiline-20221125-D7		1.44	25402			1	0.72812	-27.2	2046	2022-11-25	18:14:29	2:C,4	25402.2
62	Bedaquiline-20221125-D8		1.43	30981			1	0.88803	-11.2	1670	2022-11-25	18:17:00	2:C,5	30981
63	Bedaquiline-20221125-D9		1.43	35293			1	1.01162	1.2	2085	2022-11-25	18:19:27	2:C,6	35292.6
64	Bedaquiline-20221125-D10		1.44	21553			1	0.61778	-38.2	2062	2022-11-25	18:21:55	2:C,7	21552.9
65	Bedaquiline-20221125-D11		1.44	24088			1	0.69044	-31	1431	2022-11-25	18:24:25	2:C,8	24087.8
66	Bedaquiline-20221125-D12		1.43	30573			1	0.87634	-12.4	1797	2022-11-25	18:26:53	2:D,1	30573.3
67	Bedaquiline-20221125-E1		1.43	36946			1	1.05901	5.9	2299	2022-11-25	18:29:24	2:D,2	36945.9
68	Bedaquiline-20221125-E2		1.43	21408			1	0.61362	-38.6	1302	2022-11-25	18:31:50	2:D,3	21407.7
69	Bedaquiline-20221125-E3		1.43	22171			1	0.63549	-36.5	1450	2022-11-25	18:34:17	2:D,4	22170.5
70	Bedaquiline-20221125-E4		1.43	30744			1	0.88123	-11.9	2363	2022-11-25	18:36:49	2:D,5	30743.9
71	Bedaquiline-20221125-E5		1.43	33897			1	0.9716	-2.8	1816	2022-11-25	18:39:15	2:D,6	33896.7
72	Bedaquiline-20221125-E6		1.43	19393			1	0.55587	-44.4	963	2022-11-25	18:41:42	2:D,7	19393
73	Bedaquiline-20221125-E7		1.43	25389			1	0.72773	-27.2	1598	2022-11-25	18:44:14	2:D,8	25388.7
74	Bedaquiline-20221125-E8		1.43	32030			1	0.91808	-8.2	1995	2022-11-25	18:46:40	2:E,1	32029.5
75	Bedaquiline-20221125-E9		1.43	36318			1	1.041	4.1	3468	2022-11-25	18:49:13	2:E,2	36317.9
76	Bedaquiline-20221125-E10		1.44	22236			1	0.63735	-36.3	1341	2022-11-25	18:51:39	2:E,3	22235.5
77	Bedaquiline-20221125-E11		1.43	24830			1	0.71171	-28.8	1757	2022-11-25	18:54:06	2:E,4	24829.7
78	Bedaquiline-20221125-E12		1.43	31465			1	0.90191	-9.8	2221	2022-11-25	18:56:38	2:E,5	31465.2
Compound 2: M2
	Name	Sample Text	RT	Area	IS Area	Type	Std. Conc	Conc.	%Dev	S/N	Acq.Date	Acq.Time	Vial	Response
1	Bedaquiline-20221125-1		1.36	64702	37329.2			0.02289		28381	2022-11-25	15:45:13	1:A,7	1.733				μM	C			V
2	Bedaquiline-20221125-2		1.35	58590	37699.6			0.01658		12192	2022-11-25	15:47:46	1:A,8	1.554				1	0.02289	0.01658	0.01204	0.00254333	0.00184222	0.00133778
3	Bedaquiline-20221125-3		1.35	54500	38237.9			0.01204		15500	2022-11-25	15:50:13	1:B,1	1.425				5	0.18557	0.30261	0.22717	0.0206189	0.0336233	0.0252411
4	Bedaquiline-20221125-4		1.35	209241	32941.8			0.18557		44502	2022-11-25	15:52:45	1:B,2	6.352				10	0.33471	0.32085	0.29643	0.03719	0.03565	0.0329367
5	Bedaquiline-20221125-5		1.35	204004	21086.3			0.30261		25926	2022-11-25	15:55:13	1:B,3	9.675				20	0.41613	0.44751	0.54507	0.0462367	0.0497233	0.0605633
6	Bedaquiline-20221125-6		1.35	220435	29262.7			0.22717		84957	2022-11-25	15:57:47	1:B,4	7.533				50	0.64178	0.51906	0.52257	0.0713089	0.0576733	0.0580633
7	Bedaquiline-20221125-7		1.35	375127	35435.5			0.33471		39085	2022-11-25	16:00:20	1:B,5	10.586				100	0.3246	0.33087	0.3269	0.0360667	0.0367633	0.0363222
8	Bedaquiline-20221125-8		1.35	366320	35939.1			0.32085		59983	2022-11-25	16:02:47	1:B,6	10.193
9	Bedaquiline-20221125-9		1.35	374318	39404.1			0.29643		46293	2022-11-25	16:05:19	1:B,7	9.499
10	Bedaquiline-20221125-10		1.35	478565	37104.7			0.41613		118689	2022-11-25	16:07:46	1:B,8	12.898
11	Bedaquiline-20221125-11		1.35	517597	37537.6			0.44751		34602	2022-11-25	16:10:13	1:C,1	13.789
12	Bedaquiline-20221125-12		1.35	466251	28157.7			0.54507		87125	2022-11-25	16:12:44	1:C,2	16.559											Vmax	0.3672
13	Bedaquiline-20221125-13		1.35	438988	22740.6			0.64178		48534	2022-11-25	16:15:10	1:C,3	19.304											Km	82.75
14	Bedaquiline-20221125-14		1.35	487657	30825.1			0.51906		74818	2022-11-25	16:17:43	1:C,4	15.82											Ki	13.53
15	Bedaquiline-20221125-15		1.35	552032	34676.2			0.52257		54968	2022-11-25	16:20:11	1:C,5	15.92
16	Bedaquiline-20221125-16		1.35	386059	37484.4			0.3246		31815	2022-11-25	16:22:37	1:C,6	10.299
17	Bedaquiline-20221125-17		1.35	391262	37344.3			0.33087		28963	2022-11-25	16:25:07	1:C,7	10.477
18	Bedaquiline-20221125-18		1.35	400064	38599.5			0.3269		53315	2022-11-25	16:27:34	1:C,8	10.364
19	Bedaquiline-20221125-A1		1.36	246293	26036.9			0.29502		26877	2022-11-25	16:30:07	1:D,1	9.459
20	Bedaquiline-20221125-A2		1.35	235086	21460.9			0.34767		49234	2022-11-25	16:32:34	1:D,2	10.954
21	Bedaquiline-20221125-A3		1.35	240163	30341.7			0.24064		36027	2022-11-25	16:35:06	1:D,3	7.915
22	Bedaquiline-20221125-A4		1.35	373401	34556.5			0.34244		42618	2022-11-25	16:37:33	1:D,4	10.806
23	Bedaquiline-20221125-A5		1.35	375127	36048.7			0.32837		42494	2022-11-25	16:40:05	1:D,5	10.406
24	Bedaquiline-20221125-A6		1.35	371710	24763			0.49055		79213	2022-11-25	16:42:32	1:D,6	15.011
25	Bedaquiline-20221125-A7		1.35	441518	25948.2			0.56116		50436	2022-11-25	16:45:04	1:D,7	17.015
26	Bedaquiline-20221125-A8		1.35	462333	32063.6			0.46972		42624	2022-11-25	16:47:32	1:D,8	14.419
27	Bedaquiline-20221125-A9		1.35	481197	36408.4			0.42736		81486	2022-11-25	16:49:59	1:E,1	13.217
28	Bedaquiline-20221125-A10		1.35	424193	38647.5			0.34844		60685	2022-11-25	16:52:30	1:E,2	10.976
29	Bedaquiline-20221125-A11		1.35	442455	39496.8			0.35641		34358	2022-11-25	16:54:57	1:E,3	11.202
30	Bedaquiline-20221125-A12		1.35	439825	29042.2			0.49526		47233	2022-11-25	16:57:24	1:E,4	15.144
31	Bedaquiline-20221125-B1		1.35	173147	23677.3			0.21942		25833	2022-11-25	16:59:55	1:E,5	7.313
32	Bedaquiline-20221125-B2		1.35	178777	31041.2			0.1647		23545	2022-11-25	17:02:22	1:E,6	5.759
33	Bedaquiline-20221125-B3		1.35	171199	35744			0.13054		21073	2022-11-25	17:04:48	1:E,7	4.79
34	Bedaquiline-20221125-B4		1.35	285146	39212.6			0.21797		23406	2022-11-25	17:07:20	1:E,8	7.272
35	Bedaquiline-20221125-B5		1.35	300260	41165.6			0.21875		51051	2022-11-25	17:09:50	1:F,1	7.294
36	Bedaquiline-20221125-B6		1.35	295580	40345.2			0.21989		42149	2022-11-25	17:12:22	1:F,2	7.326
37	Bedaquiline-20221125-B7		1.35	363698	29203.7			0.40049		36078	2022-11-25	17:14:50	1:F,3	12.454
38	Bedaquiline-20221125-B8		1.35	312818	20894.9			0.48915		39740	2022-11-25	17:17:22	1:F,4	14.971
39	Bedaquiline-20221125-B9		1.35	355110	28746.4			0.39695		56253	2022-11-25	17:19:49	1:F,5	12.353
40	Bedaquiline-20221125-B10		1.35	343615	30747.8			0.35546		25438	2022-11-25	17:22:23	1:F,6	11.175
41	Bedaquiline-20221125-B11		1.35	324208	19287.6			0.5539		23935	2022-11-25	17:24:50	1:F,7	16.809
42	Bedaquiline-20221125-B12		1.35	333509	24000.8			0.45128		42077	2022-11-25	17:27:24	2:A,1	13.896
43	Bedaquiline-20221125-C1		1.35	163823	29158.7			0.15973		15177	2022-11-25	17:29:51	2:A,2	5.618
44	Bedaquiline-20221125-C2		1.35	150666	27368.8			0.15574		17410	2022-11-25	17:32:22	2:A,3	5.505
45	Bedaquiline-20221125-C3		1.35	134091	18233.9			0.22086		38624	2022-11-25	17:34:48	2:A,4	7.354
46	Bedaquiline-20221125-C4		1.35	249816	25682.9			0.30445		18713	2022-11-25	17:37:15	2:A,5	9.727
47	Bedaquiline-20221125-C5		1.35	254709	33631.1			0.2286		25104	2022-11-25	17:39:47	2:A,6	7.574
48	Bedaquiline-20221125-C6		1.35	241335	23004.6			0.33135		38287	2022-11-25	17:42:13	2:A,7	10.491
49	Bedaquiline-20221125-C7		1.35	317949	23231.9			0.44389		55784	2022-11-25	17:44:39	2:A,8	13.686
50	Bedaquiline-20221125-C8		1.35	321020	31141.6			0.32493		22479	2022-11-25	17:47:05	2:B,1	10.308
51	Bedaquiline-20221125-C9		1.35	320908	34197.9			0.29236		26905	2022-11-25	17:49:32	2:B,2	9.384
52	Bedaquiline-20221125-C10		1.35	284618	23893.6			0.3814		24619	2022-11-25	17:52:03	2:B,3	11.912
53	Bedaquiline-20221125-C11		1.35	293952	26010.1			0.3599		34463	2022-11-25	17:54:30	2:B,4	11.301
54	Bedaquiline-20221125-C12		1.35	308918	33075.6			0.29081		35380	2022-11-25	17:57:03	2:B,5	9.34
55	Bedaquiline-20221125-D1		1.35	131459	32425.1			0.10464		24079	2022-11-25	17:59:29	2:B,6	4.054
56	Bedaquiline-20221125-D2		1.35	121100	20612.5			0.16878		18831	2022-11-25	18:02:03	2:B,7	5.875
57	Bedaquiline-20221125-D3		1.35	121081	26052.2			0.12554		16234	2022-11-25	18:04:29	2:B,8	4.648
58	Bedaquiline-20221125-D4		1.35	224037	33345.1			0.19849		18388	2022-11-25	18:07:02	2:C,1	6.719
59	Bedaquiline-20221125-D5		1.35	217177	27708.3			0.23791		41011	2022-11-25	18:09:36	2:C,2	7.838
60	Bedaquiline-20221125-D6		1.35	197156	17790.3			0.35218		14157	2022-11-25	18:12:02	2:C,3	11.082
61	Bedaquiline-20221125-D7		1.35	268176	25402.2			0.33369		33958	2022-11-25	18:14:29	2:C,4	10.557
62	Bedaquiline-20221125-D8		1.35	271120	30981			0.27008		50255	2022-11-25	18:17:00	2:C,5	8.751
63	Bedaquiline-20221125-D9		1.35	277672	35292.6			0.23896		35548	2022-11-25	18:19:27	2:C,6	7.868
64	Bedaquiline-20221125-D10		1.35	248674	21552.9			0.36823		25759	2022-11-25	18:21:55	2:C,7	11.538
65	Bedaquiline-20221125-D11		1.35	247645	24087.8			0.32396		27865	2022-11-25	18:24:25	2:C,8	10.281
66	Bedaquiline-20221125-D12		1.35	252939	30573.3			0.25324		54120	2022-11-25	18:26:53	2:D,1	8.273
67	Bedaquiline-20221125-E1		1.35	105517	36945.9			0.06244		20103	2022-11-25	18:29:24	2:D,2	2.856
68	Bedaquiline-20221125-E2		1.35	94782	21407.7			0.11779		9137	2022-11-25	18:31:50	2:D,3	4.427
69	Bedaquiline-20221125-E3		1.35	97148	22170.5			0.11618		13327	2022-11-25	18:34:17	2:D,4	4.382
70	Bedaquiline-20221125-E4		1.35	154293	30743.9			0.13861		15467	2022-11-25	18:36:49	2:D,5	5.019
71	Bedaquiline-20221125-E5		1.35	165154	33896.7			0.13346		26841	2022-11-25	18:39:15	2:D,6	4.872
72	Bedaquiline-20221125-E6		1.35	152832	19393			0.23942		51363	2022-11-25	18:41:42	2:D,7	7.881
73	Bedaquiline-20221125-E7		1.35	199595	25388.7			0.23874		23081	2022-11-25	18:44:14	2:D,8	7.862
74	Bedaquiline-20221125-E8		1.35	206828	32029.5			0.18929		18241	2022-11-25	18:46:40	2:E,1	6.457
75	Bedaquiline-20221125-E9		1.35	208357	36317.9			0.16391		39059	2022-11-25	18:49:13	2:E,2	5.737
76	Bedaquiline-20221125-E10		1.35	185518	22235.5			0.25571		25480	2022-11-25	18:51:39	2:E,3	8.343
77	Bedaquiline-20221125-E11		1.35	183120	24829.7			0.22161		23612	2022-11-25	18:54:06	2:E,4	7.375
78	Bedaquiline-20221125-E12		1.35	184052	31465.2			0.16787		53961	2022-11-25	18:56:38	2:E,5	5.849
