# Supplementary material for: Inhibitory effect of carvedilol on bedaquiline metabolism in vitro and in vivo
Source: PeerJ journal article supplement (doi:10.7717/peerj.19313), 2025-04-30
Supplement: Data.zip [file Fig.6.xlsx]

## Sheet: 总
Quantify Compound Summary Report
Printed Fri Sep 30 10:45:13 2022
Compound 1: Fluconazole
	Name	Sample Text	RT	Area	IS Area	Type	Std. Conc	Conc.	%Dev	S/N	Acq.Date	Acq.Time	Vial	Response
1	bedaq-20220929-S1		1.18	131802		Standard	1	0.98394	-1.6	4	2022-09-29	17:12:18	2:A,1	131802
2	bedaq-20220929-S2		1.18	130057		Standard	1	0.97092	-2.9	4	2022-09-29	17:14:48	2:A,2	130057
3	bedaq-20220929-S3		1.18	132423		Standard	1	0.98858	-1.1	4	2022-09-29	17:17:21	2:A,3	132423
4	bedaq-20220929-S4		1.18	132892		Standard	1	0.99208	-0.8	4	2022-09-29	17:19:54	2:A,4	132892
5	bedaq-20220929-S5		1.18	134558		Standard	1	1.00452	0.5	4	2022-09-29	17:22:23	2:A,5	134558
6	bedaq-20220929-S6		1.17	141985		Standard	1	1.05996	6	5	2022-09-29	17:24:53	2:A,6	141985
7	bedaq-20220929-Meoh-3						1						1:F,8
8	bedaq-20220929-Meoh-4		1.18	666			1	0.00497	-99.5	3	2022-09-29	17:27:30	1:F,8	665.954
9	bedaq-20220929-A1-1		1.18	152099			1	1.13547	13.5	4	2022-09-29	17:30:01	2:A,7	152099
10	bedaq-20220929-A1-2		1.17	149682			1	1.11742	11.7	4	2022-09-29	17:32:35	2:A,8	149682
11	bedaq-20220929-A1-3		1.17	150400			1	1.12279	12.3	5	2022-09-29	17:35:03	2:B,1	150400
12	bedaq-20220929-A1-4		1.18	147971			1	1.10465	10.5	4	2022-09-29	17:37:35	2:B,2	147971
13	bedaq-20220929-A1-5		1.17	143202			1	1.06905	6.9	4	2022-09-29	17:40:08	2:B,3	143202
14	bedaq-20220929-A1-6		1.17	151381			1	1.13011	13	5	2022-09-29	17:42:43	2:B,4	151381
15	bedaq-20220929-A1-7		1.17	139949			1	1.04477	4.5	5	2022-09-29	17:45:17	2:B,5	139949
16	bedaq-20220929-A1-8		1.17	143979			1	1.07485	7.5	4	2022-09-29	17:47:50	2:B,6	143979
17	bedaq-20220929-A1-9		1.17	144426			1	1.07818	7.8	5	2022-09-29	17:50:24	2:B,7	144426
18	bedaq-20220929-A1-10		1.18	144882			1	1.08159	8.2	4	2022-09-29	17:52:51	2:B,8	144882
19	bedaq-20220929-A1-11		1.18	145958			1	1.08962	9	4	2022-09-29	17:55:24	2:C,1	145958
20	bedaq-20220929-A2-1		1.17	150428			1	1.12299	12.3	4	2022-09-29	17:57:57	2:C,2	150428
21	bedaq-20220929-A2-2		1.17	150491			1	1.12346	12.3	5	2022-09-29	18:00:25	2:C,3	150491
22	bedaq-20220929-A2-3		1.17	148776			1	1.11066	11.1	5	2022-09-29	18:02:56	2:C,4	148776
23	bedaq-20220929-A2-4		1.17	148120			1	1.10576	10.6	5	2022-09-29	18:05:30	2:C,5	148120
24	bedaq-20220929-A2-5		1.17	147683			1	1.1025	10.3	4	2022-09-29	18:07:58	2:C,6	147683
25	bedaq-20220929-A2-6		1.17	145217			1	1.08409	8.4	5	2022-09-29	18:10:30	2:C,7	145217
26	bedaq-20220929-A2-7		1.17	154156			1	1.15082	15.1	5	2022-09-29	18:12:58	2:C,8	154156
27	bedaq-20220929-A2-8		1.17	150486			1	1.12342	12.3	5	2022-09-29	18:15:28	2:D,1	150486
28	bedaq-20220929-A2-9		1.17	144715			1	1.08034	8	5	2022-09-29	18:17:57	2:D,2	144715
29	bedaq-20220929-A2-10		1.17	142832			1	1.06628	6.6	5	2022-09-29	18:20:29	2:D,3	142832
30	bedaq-20220929-A2-11		1.17	135482			1	1.01141	1.1	5	2022-09-29	18:22:57	2:D,4	135482
31	bedaq-20220929-A3-1		1.18	145582			1	1.08681	8.7	4	2022-09-29	18:25:29	2:D,5	145582
32	bedaq-20220929-A3-2		1.17	149386			1	1.11521	11.5	5	2022-09-29	18:28:02	2:D,6	149386
33	bedaq-20220929-A3-3		1.17	144461			1	1.07844	7.8	5	2022-09-29	18:30:36	2:D,7	144461
34	bedaq-20220929-A3-4		1.17	142589			1	1.06447	6.4	5	2022-09-29	18:33:10	2:D,8	142589
35	bedaq-20220929-A3-5		1.17	150049			1	1.12016	12	5	2022-09-29	18:35:38	2:E,1	150049
36	bedaq-20220929-A3-6		1.17	149936			1	1.11932	11.9	4	2022-09-29	18:38:10	2:E,2	149936
37	bedaq-20220929-A3-7		1.18	146253			1	1.09183	9.2	5	2022-09-29	18:40:43	2:E,3	146253
38	bedaq-20220929-A3-8		1.17	167815			1	1.25279	25.3	5	2022-09-29	18:43:11	2:E,4	167815
39	bedaq-20220929-A3-9		1.18	145873			1	1.08899	8.9	4	2022-09-29	18:45:43	2:E,5	145873
40	bedaq-20220929-A3-10		1.17	141232			1	1.05434	5.4	5	2022-09-29	18:48:11	2:E,6	141232
41	bedaq-20220929-A3-11		1.17	147291			1	1.09957	10	4	2022-09-29	18:50:43	2:E,7	147291
42	bedaq-20220929-A4-1		1.17	148452			1	1.10824	10.8	4	2022-09-29	18:53:11	2:E,8	148452
43	bedaq-20220929-A4-2		1.17	151981			1	1.13458	13.5	5	2022-09-29	18:55:44	2:F,1	151981
44	bedaq-20220929-A4-3		1.17	150915			1	1.12663	12.7	4	2022-09-29	18:58:17	2:F,2	150915
45	bedaq-20220929-A4-4		1.18	147386			1	1.10028	10	4	2022-09-29	19:00:45	2:F,3	147386
46	bedaq-20220929-A4-5		1.18	157044			1	1.17238	17.2	4	2022-09-29	19:03:16	2:F,4	157044
47	bedaq-20220929-A4-6		1.18	150141			1	1.12085	12.1	4	2022-09-29	19:05:45	2:F,5	150141
48	bedaq-20220929-A4-7		1.17	144246			1	1.07684	7.7	5	2022-09-29	19:08:17	2:F,6	144246
49	bedaq-20220929-A4-8		1.18	147894			1	1.10407	10.4	4	2022-09-29	19:10:50	2:F,7	147894
50	bedaq-20220929-A4-9		1.17	145350			1	1.08508	8.5	5	2022-09-29	19:13:17	2:F,8	145350
51	bedaq-20220929-A4-10		1.17	145196			1	1.08393	8.4	5	2022-09-29	19:15:51	1:A,1	145196
52	bedaq-20220929-A4-11		1.17	153486			1	1.14582	14.6	4	2022-09-29	19:18:23	1:A,2	153486
53	bedaq-20220929-A5-1		1.17	157875			1	1.17858	17.9	4	2022-09-29	19:20:51	1:A,3	157875
54	bedaq-20220929-A5-2		1.17	152656			1	1.13962	14	4	2022-09-29	19:23:23	1:A,4	152656
55	bedaq-20220929-A5-3		1.17	153544			1	1.14625	14.6	4	2022-09-29	19:25:57	1:A,5	153544
56	bedaq-20220929-A5-4		1.17	156511			1	1.1684	16.8	5	2022-09-29	19:28:30	1:A,6	156511
57	bedaq-20220929-A5-5		1.17	151303			1	1.12952	13	5	2022-09-29	19:31:04	1:A,7	151303
58	bedaq-20220929-A5-6		1.18	145585			1	1.08683	8.7	4	2022-09-29	19:33:32	1:A,8	145585
59	bedaq-20220929-A5-7		1.18	150250			1	1.12166	12.2	4	2022-09-29	19:36:03	1:B,1	150250
60	bedaq-20220929-A5-8		1.17	150296			1	1.12201	12.2	4	2022-09-29	19:38:36	1:B,2	150296
61	bedaq-20220929-A5-9		1.17	144736			1	1.0805	8	4	2022-09-29	19:41:10	1:B,3	144736
62	bedaq-20220929-A5-10		1.18	148338			1	1.10739	10.7	4	2022-09-29	19:43:43	1:B,4	148338
63	bedaq-20220929-A5-11		1.18	153205			1	1.14372	14.4	4	2022-09-29	19:46:17	1:B,5	153205
64	bedaq-20220929-A6-1		1.18	154985			1	1.15701	15.7	3	2022-09-29	19:48:50	1:B,6	154985
65	bedaq-20220929-A6-2		1.18	158213			1	1.18111	18.1	4	2022-09-29	19:51:24	1:B,7	158213
66	bedaq-20220929-A6-3		1.18	156810			1	1.17064	17.1	4	2022-09-29	19:53:57	1:B,8	156810
67	bedaq-20220929-A6-4		1.18	155683			1	1.16222	16.2	4	2022-09-29	19:56:31	1:C,1	155683
68	bedaq-20220929-A6-5		1.17	154335			1	1.15216	15.2	5	2022-09-29	19:59:05	1:C,2	154335
69	bedaq-20220929-A6-6		1.17	151191			1	1.12869	12.9	4	2022-09-29	20:01:38	1:C,3	151191
70	bedaq-20220929-A6-7		1.17	159968			1	1.19421	19.4	4	2022-09-29	20:04:12	1:C,4	159968
71	bedaq-20220929-A6-8		1.17	152980			1	1.14204	14.2	4	2022-09-29	20:06:45	1:C,5	152980
72	bedaq-20220929-A6-9		1.18	161598			1	1.20638	20.6	4	2022-09-29	20:09:19	1:C,6	161598
73	bedaq-20220929-A6-10		1.17	156513			1	1.16842	16.8	4	2022-09-29	20:11:54	1:C,7	156513
74	bedaq-20220929-A6-11		1.17	159865			1	1.19344	19.3	4	2022-09-29	20:14:26	1:C,8	159865
75	bedaq-20220929-B1-1		1.17	150989			1	1.12718	12.7	5	2022-09-29	20:16:54	1:D,1	150989
76	bedaq-20220929-B1-2		1.18	154137			1	1.15068	15.1	4	2022-09-29	20:19:26	1:D,2	154137
77	bedaq-20220929-B1-3		1.17	163041			1	1.21715	21.7	5	2022-09-29	20:21:59	1:D,3	163041
78	bedaq-20220929-B1-4		1.17	167369			1	1.24946	24.9	4	2022-09-29	20:24:33	1:D,4	167369
79	bedaq-20220929-B1-5		1.17	165629			1	1.23647	23.6	5	2022-09-29	20:27:07	1:D,5	165629
80	bedaq-20220929-B1-6		1.18	154330			1	1.15212	15.2	4	2022-09-29	20:29:40	1:D,6	154330
81	bedaq-20220929-B1-7		1.17	149860			1	1.11875	11.9	4	2022-09-29	20:32:14	1:D,7	149860
82	bedaq-20220929-B1-8		1.18	143094			1	1.06824	6.8	4	2022-09-29	20:34:47	1:D,8	143094
83	bedaq-20220929-B1-9		1.17	155262			1	1.15908	15.9	4	2022-09-29	20:37:21	1:E,1	155262
84	bedaq-20220929-B1-10		1.18	182983			1	1.36602	36.6	4	2022-09-29	20:39:49	1:E,2	182983
85	bedaq-20220929-B1-11		1.18	166245			1	1.24107	24.1	4	2022-09-29	20:42:21	1:E,3	166245
86	bedaq-20220929-B2-1		1.17	167960			1	1.25387	25.4	5	2022-09-29	20:44:54	1:E,4	167960
87	bedaq-20220929-B2-2		1.18	161933			1	1.20888	20.9	4	2022-09-29	20:47:29	1:E,5	161933
88	bedaq-20220929-B2-3		1.17	162070			1	1.2099	21	5	2022-09-29	20:50:02	1:E,6	162070
89	bedaq-20220929-B2-4		1.18	163095			1	1.21755	21.8	4	2022-09-29	20:52:36	1:E,7	163095
90	bedaq-20220929-B2-5		1.18	147435			1	1.10065	10.1	4	2022-09-29	20:55:04	1:E,8	147435
91	bedaq-20220929-B2-6		1.18	164227			1	1.22601	22.6	3	2022-09-29	20:57:39	1:F,1	164227
92	bedaq-20220929-B2-7		1.18	164708			1	1.2296	23	4	2022-09-29	21:00:12	1:F,2	164708
93	bedaq-20220929-B2-8		1.18	172053			1	1.28443	28.4	4	2022-09-29	21:02:46	1:F,3	172053
94	bedaq-20220929-B2-9		1.18	159826			1	1.19315	19.3	3	2022-09-29	21:05:19	1:F,4	159826
95	bedaq-20220929-B2-10		1.18	166052			1	1.23963	24	4	2022-09-29	21:07:48	1:F,5	166052
96	bedaq-20220929-B2-11		1.18	164388			1	1.22721	22.7	4	2022-09-29	21:10:19	1:F,6	164388
97	bedaq-20220929-B3-1		1.18	167848			1	1.25304	25.3	3	2022-09-29	21:12:49	1:F,7	167848
98	bedaq-20220929-B3-2		1.18	175056			1	1.30685	30.7	4	2022-09-29	21:15:21	2:A,1	175056
99	bedaq-20220929-B3-3		1.18	180357			1	1.34642	34.6	4	2022-09-29	21:17:53	2:A,2	180357
100	bedaq-20220929-B3-4		1.18	173934			1	1.29847	29.8	4	2022-09-29	21:20:26	2:A,3	173934
101	bedaq-20220929-B3-5		1.18	179680			1	1.34136	34.1	3	2022-09-29	21:23:00	2:A,4	179680
102	bedaq-20220929-B3-6		1.18	172589			1	1.28843	28.8	4	2022-09-29	21:25:33	2:A,5	172589
103	bedaq-20220929-B3-7		1.18	165374			1	1.23457	23.5	4	2022-09-29	21:28:08	2:A,6	165374
104	bedaq-20220929-B3-8		1.18	166991			1	1.24664	24.7	4	2022-09-29	21:30:42	2:A,7	166991
105	bedaq-20220929-B3-9		1.18	173380			1	1.29434	29.4	4	2022-09-29	21:33:10	2:A,8	173380
106	bedaq-20220929-B3-10		1.18	166638			1	1.24401	24.4	4	2022-09-29	21:35:42	2:B,1	166638
107	bedaq-20220929-B3-11		1.18	175470			1	1.30994	31	4	2022-09-29	21:38:15	2:B,2	175470
108	bedaq-20220929-B4-1		1.18	168591			1	1.25859	25.9	4	2022-09-29	21:40:49	2:B,3	168591
109	bedaq-20220929-B4-2		1.18	183223			1	1.36782	36.8	3	2022-09-29	21:43:16	2:B,4	183223
110	bedaq-20220929-B4-3		1.18	180619			1	1.34838	34.8	4	2022-09-29	21:45:51	2:B,5	180619
111	bedaq-20220929-B4-4		1.18	191736			1	1.43137	43.1	3	2022-09-29	21:48:24	2:B,6	191736
112	bedaq-20220929-B4-5		1.18	176764			1	1.3196	32	3	2022-09-29	21:50:57	2:B,7	176764
113	bedaq-20220929-B4-6		1.18	177121			1	1.32226	32.2	3	2022-09-29	21:53:27	2:B,8	177121
114	bedaq-20220929-B4-7		1.18	161504			1	1.20568	20.6	3	2022-09-29	21:55:57	2:C,1	161504
115	bedaq-20220929-B4-8		1.18	184087			1	1.37427	37.4	3	2022-09-29	21:58:30	2:C,2	184087
116	bedaq-20220929-B4-9		1.18	184600			1	1.37809	37.8	3	2022-09-29	22:00:58	2:C,3	184600
117	bedaq-20220929-B4-10		1.18	176755			1	1.31953	32	3	2022-09-29	22:03:35	2:C,4	176755
118	bedaq-20220929-B4-11		1.18	180261			1	1.34571	34.6	3	2022-09-29	22:06:10	2:C,5	180261
119	bedaq-20220929-B5-1		1.18	188412			1	1.40656	40.7	3	2022-09-29	22:08:44	2:C,6	188412
120	bedaq-20220929-B5-2		1.18	181714			1	1.35655	35.7	3	2022-09-29	22:11:17	2:C,7	181714
121	bedaq-20220929-B5-3		1.18	191682			1	1.43097	43.1	3	2022-09-29	22:13:45	2:C,8	191682
122	bedaq-20220929-B5-4		1.18	182700			1	1.36392	36.4	3	2022-09-29	22:16:20	2:D,1	182700
123	bedaq-20220929-B5-5		1.18	184760			1	1.37929	37.9	3	2022-09-29	22:18:48	2:D,2	184760
124	bedaq-20220929-B5-6		1.18	184926			1	1.38053	38.1	3	2022-09-29	22:21:20	2:D,3	184926
125	bedaq-20220929-B5-7		1.18	170897			1	1.2758	27.6	3	2022-09-29	22:23:53	2:D,4	170897
126	bedaq-20220929-B5-8		1.18	179911			1	1.34309	34.3	3	2022-09-29	22:26:21	2:D,5	179911
127	bedaq-20220929-B5-9		1.18	179518			1	1.34016	34	3	2022-09-29	22:28:53	2:D,6	179518
128	bedaq-20220929-B5-10		1.18	180645			1	1.34857	34.9	4	2022-09-29	22:31:26	2:D,7	180645
129	bedaq-20220929-B5-11		1.18	161116			1	1.20278	20.3	3	2022-09-29	22:33:54	2:D,8	161116
130	bedaq-20220929-B6-1		1.18	201117			1	1.5014	50.1	3	2022-09-29	22:36:25	2:E,1	201117
131	bedaq-20220929-B6-2		1.18	203832			1	1.52167	52.2	3	2022-09-29	22:38:59	2:E,2	203832
132	bedaq-20220929-B6-3		1.18	179182			1	1.33765	33.8	4	2022-09-29	22:41:26	2:E,3	179182
133	bedaq-20220929-B6-4		1.17	194383			1	1.45113	45.1	7	2022-09-29	22:43:58	2:E,4	194383
134	bedaq-20220929-B6-5		1.17	178375			1	1.33163	33.2	5	2022-09-29	22:46:31	2:E,5	178375
135	bedaq-20220929-B6-6		1.17	181105			1	1.352	35.2	5	2022-09-29	22:49:00	2:E,6	181105
136	bedaq-20220929-B6-7		1.17	173034			1	1.29175	29.2	6	2022-09-29	22:51:32	2:E,7	173034
137	bedaq-20220929-B6-8		1.17	173970			1	1.29874	29.9	5	2022-09-29	22:54:00	2:E,8	173970
138	bedaq-20220929-B6-9		1.17	172875			1	1.29057	29.1	6	2022-09-29	22:56:32	2:F,1	172875
139	bedaq-20220929-B6-10		1.17	184277			1	1.37569	37.6	6	2022-09-29	22:59:05	2:F,2	184277
140	bedaq-20220929-B6-11		1.17	185750			1	1.38668	38.7	6	2022-09-29	23:01:33	2:F,3	185750
141	bedaq-20220929-C1-1		1.17	176303			1	1.31616	31.6	6	2022-09-29	23:04:05	2:F,4	176303
142	bedaq-20220929-C1-2		1.17	178765			1	1.33454	33.5	5	2022-09-29	23:06:38	2:F,5	178765
143	bedaq-20220929-C1-3		1.18	219314			1	1.63725	63.7	3	2022-09-29	23:09:06	2:F,6	219314
144	bedaq-20220929-C1-4		1.17	184403			1	1.37663	37.7	5	2022-09-29	23:11:38	2:F,7	184403
145	bedaq-20220929-C1-5		1.17	195503			1	1.45949	45.9	4	2022-09-29	23:14:07	2:F,8	195502
146	bedaq-20220929-C1-6		1.17	181570			1	1.35548	35.5	4	2022-09-29	23:16:42	1:A,1	181570
147	bedaq-20220929-C1-7		1.17	184575			1	1.37791	37.8	4	2022-09-29	23:19:17	1:A,2	184575
148	bedaq-20220929-C1-8		1.17	199945			1	1.49265	49.3	5	2022-09-29	23:21:50	1:A,3	199945
149	bedaq-20220929-C1-9		1.17	189514			1	1.41478	41.5	5	2022-09-29	23:24:18	1:A,4	189514
150	bedaq-20220929-C1-10		1.17	192631			1	1.43805	43.8	5	2022-09-29	23:26:50	1:A,5	192631
151	bedaq-20220929-C1-11		1.17	201426			1	1.50371	50.4	5	2022-09-29	23:29:23	1:A,6	201426
152	bedaq-20220929-C2-1		1.17	187984			1	1.40336	40.3	5	2022-09-29	23:31:57	1:A,7	187984
153	bedaq-20220929-C2-2		1.18	189655			1	1.41584	41.6	4	2022-09-29	23:34:31	1:A,8	189655
154	bedaq-20220929-C2-3		1.17	197490			1	1.47433	47.4	5	2022-09-29	23:36:59	1:B,1	197490
155	bedaq-20220929-C2-4		1.17	183900			1	1.37287	37.3	4	2022-09-29	23:39:29	1:B,2	183900
156	bedaq-20220929-C2-5		1.17	206587			1	1.54224	54.2	4	2022-09-29	23:42:03	1:B,3	206587
157	bedaq-20220929-C2-6		1.17	179791			1	1.3422	34.2	5	2022-09-29	23:44:37	1:B,4	179791
158	bedaq-20220929-C2-7		1.17	187139			1	1.39705	39.7	5	2022-09-29	23:47:10	1:B,5	187139
159	bedaq-20220929-C2-8		1.17	184997			1	1.38106	38.1	5	2022-09-29	23:49:44	1:B,6	184997
160	bedaq-20220929-C2-9		1.17	184088			1	1.37427	37.4	4	2022-09-29	23:52:17	1:B,7	184088
161	bedaq-20220929-C2-10		1.17	183362			1	1.36885	36.9	5	2022-09-29	23:54:51	1:B,8	183362
162	bedaq-20220929-C2-11		1.17	182343			1	1.36125	36.1	5	2022-09-29	23:57:19	1:C,1	182343
163	bedaq-20220929-C3-1		1.17	198316			1	1.48049	48	5	2022-09-29	23:59:51	1:C,2	198316
164	bedaq-20220929-C3-2		1.17	189723			1	1.41634	41.6	5	2022-09-30	00:02:24	1:C,3	189723
165	bedaq-20220929-C3-3		1.17	193423			1	1.44397	44.4	5	2022-09-30	00:04:58	1:C,4	193423
166	bedaq-20220929-C3-4		1.17	193844			1	1.4471	44.7	5	2022-09-30	00:07:32	1:C,5	193844
167	bedaq-20220929-C3-5		1.17	192408			1	1.43639	43.6	5	2022-09-30	00:10:06	1:C,6	192408
168	bedaq-20220929-C3-6		1.17	200338			1	1.49559	49.6	5	2022-09-30	00:12:40	1:C,7	200338
169	bedaq-20220929-C3-7		1.17	181492			1	1.35489	35.5	5	2022-09-30	00:15:13	1:C,8	181492
170	bedaq-20220929-C3-8		1.17	209909			1	1.56704	56.7	5	2022-09-30	00:17:47	1:D,1	209909
171	bedaq-20220929-C3-9		1.17	195481			1	1.45932	45.9	5	2022-09-30	00:20:20	1:D,2	195481
172	bedaq-20220929-C3-10		1.17	218597			1	1.6319	63.2	5	2022-09-30	00:22:54	1:D,3	218597
173	bedaq-20220929-C3-11		1.17	190486			1	1.42204	42.2	4	2022-09-30	00:25:22	1:D,4	190486
174	bedaq-20220929-C4-1		1.18	186077			1	1.38912	38.9	4	2022-09-30	00:27:53	1:D,5	186077
175	bedaq-20220929-C4-2		1.17	202821			1	1.51412	51.4	4	2022-09-30	00:30:26	1:D,6	202821
176	bedaq-20220929-C4-3		1.17	183703			1	1.3714	37.1	5	2022-09-30	00:33:00	1:D,7	183703
177	bedaq-20220929-C4-4		1.17	188327			1	1.40592	40.6	5	2022-09-30	00:35:29	1:D,8	188327
178	bedaq-20220929-C4-5		1.17	188830			1	1.40967	41	5	2022-09-30	00:37:59	1:E,1	188830
179	bedaq-20220929-C4-6		1.18	181290			1	1.35339	35.3	4	2022-09-30	00:40:32	1:E,2	181290
180	bedaq-20220929-C4-7		1.18	186367			1	1.39129	39.1	4	2022-09-30	00:43:06	1:E,3	186367
181	bedaq-20220929-C4-8		1.17	191654			1	1.43076	43.1	5	2022-09-30	00:45:39	1:E,4	191654
182	bedaq-20220929-C4-9		1.17	190001			1	1.41842	41.8	5	2022-09-30	00:48:13	1:E,5	190001
183	bedaq-20220929-C4-10		1.18	194038			1	1.44855	44.9	4	2022-09-30	00:50:46	1:E,6	194038
184	bedaq-20220929-C4-11		1.17	192485			1	1.43696	43.7	5	2022-09-30	00:53:20	1:E,7	192485
185	bedaq-20220929-C5-1		1.17	209765			1	1.56596	56.6	5	2022-09-30	00:55:49	1:E,8	209765
186	bedaq-20220929-C5-2		1.17	191141			1	1.42693	42.7	5	2022-09-30	00:58:19	1:F,1	191141
187	bedaq-20220929-C5-3		1.17	191340			1	1.42841	42.8	5	2022-09-30	01:00:48	1:F,2	191340
188	bedaq-20220929-C5-4		1.18	199313			1	1.48793	48.8	4	2022-09-30	01:03:18	1:F,3	199313
189	bedaq-20220929-C5-5		1.18	199111			1	1.48643	48.6	4	2022-09-30	01:05:52	1:F,4	199111
190	bedaq-20220929-C5-6		1.17	206499			1	1.54158	54.2	4	2022-09-30	01:08:25	1:F,5	206499
191	bedaq-20220929-C5-7		1.18	190303			1	1.42067	42.1	3	2022-09-30	01:10:58	1:F,6	190303
192	bedaq-20220929-C5-8		1.17	195747			1	1.46131	46.1	4	2022-09-30	01:13:27	1:F,7	195747
193	bedaq-20220929-C5-9		1.17	189823			1	1.41708	41.7	4	2022-09-30	01:15:57	2:A,1	189823
194	bedaq-20220929-C5-10		1.17	203070			1	1.51598	51.6	4	2022-09-30	01:18:26	2:A,2	203070
195	bedaq-20220929-C5-11		1.18	217333			1	1.62246	62.2	4	2022-09-30	01:20:57	2:A,3	217333
196	bedaq-20220929-C6-1		1.18	189232			1	1.41267	41.3	4	2022-09-30	01:23:30	2:A,4	189232
197	bedaq-20220929-C6-2		1.17	184076			1	1.37419	37.4	4	2022-09-30	01:26:04	2:A,5	184076
198	bedaq-20220929-C6-3		1.18	200554			1	1.4972	49.7	4	2022-09-30	01:28:38	2:A,6	200554
199	bedaq-20220929-C6-4		1.17	199171			1	1.48687	48.7	4	2022-09-30	01:31:11	2:A,7	199171
200	bedaq-20220929-C6-5		1.18	193253			1	1.4427	44.3	3	2022-09-30	01:33:45	2:A,8	193253
201	bedaq-20220929-C6-6		1.18	186743			1	1.39409	39.4	4	2022-09-30	01:36:20	2:B,1	186743
202	bedaq-20220929-C6-7		1.18	189642			1	1.41573	41.6	4	2022-09-30	01:38:48	2:B,2	189642
203	bedaq-20220929-C6-8		1.18	185717			1	1.38644	38.6	4	2022-09-30	01:41:19	2:B,3	185717
204	bedaq-20220929-C6-9		1.17	193695			1	1.44599	44.6	4	2022-09-30	01:43:53	2:B,4	193695
205	bedaq-20220929-C6-10		1.18	195655			1	1.46062	46.1	4	2022-09-30	01:46:26	2:B,5	195655
206	bedaq-20220929-C6-11		1.18	185434			1	1.38432	38.4	4	2022-09-30	01:48:54	2:B,6	185434
207	bedaq-20220929-C6-12		1.2	1			1	1e-05	-100	0	2022-09-30	01:51:25	1:F,8	1.16
208	bedaq-20220929-D1-1		1.17	214803			1	1.60357	60.4	6	2022-09-30	07:57:24	2:A,1	214803
209	bedaq-20220929-D1-2		1.17	178434			1	1.33206	33.2	7	2022-09-30	07:59:56	2:A,2	178434
210	bedaq-20220929-D1-3		1.17	191730			1	1.43132	43.1	5	2022-09-30	08:02:29	2:A,3	191730
211	bedaq-20220929-D1-4		1.17	175056			1	1.30685	30.7	5	2022-09-30	08:05:03	2:A,4	175056
212	bedaq-20220929-D1-5		1.17	185345			1	1.38366	38.4	4	2022-09-30	08:07:36	2:A,5	185345
213	bedaq-20220929-D1-6		1.18	190108			1	1.41922	41.9	4	2022-09-30	08:10:10	2:A,6	190108
214	bedaq-20220929-D1-7		1.17	200243			1	1.49488	49.5	4	2022-09-30	08:12:43	2:A,7	200243
215	bedaq-20220929-D1-8		1.17	192522			1	1.43723	43.7	4	2022-09-30	08:15:12	2:A,8	192522
216	bedaq-20220929-D1-9		1.18	178873			1	1.33534	33.5	4	2022-09-30	08:17:43	2:B,1	178873
217	bedaq-20220929-D1-10		1.18	182736			1	1.36418	36.4	4	2022-09-30	08:20:16	2:B,2	182736
218	bedaq-20220929-D1-11		1.18	187237			1	1.39778	39.8	4	2022-09-30	08:22:50	2:B,3	187237
219	bedaq-20220929-D2-1		1.17	188772			1	1.40924	40.9	4	2022-09-30	08:25:18	2:B,4	188772
220	bedaq-20220929-D2-2		1.17	199210			1	1.48716	48.7	4	2022-09-30	08:27:50	2:B,5	199210
221	bedaq-20220929-D2-3		1.18	185764			1	1.38679	38.7	4	2022-09-30	08:30:23	2:B,6	185764
222	bedaq-20220929-D2-4		1.17	184399			1	1.3766	37.7	4	2022-09-30	08:32:57	2:B,7	184399
223	bedaq-20220929-D2-5		1.18	181420			1	1.35436	35.4	4	2022-09-30	08:35:30	2:B,8	181420
224	bedaq-20220929-D2-6		1.17	239452			1	1.78759	78.8	4	2022-09-30	08:37:58	2:C,1	239452
225	bedaq-20220929-D2-7		1.17	189081			1	1.41155	41.2	4	2022-09-30	08:40:30	2:C,2	189081
226	bedaq-20220929-D2-8		1.17	187302			1	1.39827	39.8	4	2022-09-30	08:43:03	2:C,3	187302
227	bedaq-20220929-D2-9		1.18	190966			1	1.42562	42.6	4	2022-09-30	08:45:32	2:C,4	190966
228	bedaq-20220929-D2-10		1.17	176535			1	1.31789	31.8	4	2022-09-30	08:48:02	2:C,5	176535
229	bedaq-20220929-D2-11		1.17	193230			1	1.44252	44.3	13	2022-09-30	08:50:31	2:C,6	193230
230	bedaq-20220929-D3-1		1.17	188544			1	1.40754	40.8	5	2022-09-30	08:53:03	2:C,7	188544
231	bedaq-20220929-D3-2		1.17	186334			1	1.39104	39.1	5	2022-09-30	08:55:36	2:C,8	186334
232	bedaq-20220929-D3-3		1.17	211082			1	1.57579	57.6	5	2022-09-30	08:58:10	2:D,1	211082
233	bedaq-20220929-D3-4		1.17	181658			1	1.35613	35.6	5	2022-09-30	09:00:43	2:D,2	181658
234	bedaq-20220929-D3-5		1.17	170149			1	1.27021	27	5	2022-09-30	09:03:10	2:D,3	170149
235	bedaq-20220929-D3-6		1.17	176915			1	1.32073	32.1	4	2022-09-30	09:05:43	2:D,4	176915
236	bedaq-20220929-D3-7		1.17	183912			1	1.37296	37.3	4	2022-09-30	09:08:10	2:D,5	183912
237	bedaq-20220929-D3-8		1.17	179157			1	1.33746	33.7	5	2022-09-30	09:10:45	2:D,6	179157
238	bedaq-20220929-D3-9		1.17	180196			1	1.34522	34.5	5	2022-09-30	09:13:19	2:D,7	180196
239	bedaq-20220929-D3-10		1.17	177422			1	1.32451	32.5	5	2022-09-30	09:15:52	2:D,8	177422
240	bedaq-20220929-D3-11		1.17	178833			1	1.33504	33.5	5	2022-09-30	09:18:20	2:E,1	178833
241	bedaq-20220929-D4-1		1.17	190421			1	1.42155	42.2	4	2022-09-30	09:20:55	2:E,2	190421
242	bedaq-20220929-D4-2		1.17	177996			1	1.3288	32.9	5	2022-09-30	09:23:23	2:E,3	177996
243	bedaq-20220929-D4-3		1.17	181960			1	1.35839	35.8	5	2022-09-30	09:25:54	2:E,4	181960
244	bedaq-20220929-D4-4		1.17	183586			1	1.37053	37.1	5	2022-09-30	09:28:28	2:E,5	183586
245	bedaq-20220929-D4-5		1.17	186933			1	1.39551	39.6	4	2022-09-30	09:30:56	2:E,6	186933
246	bedaq-20220929-D4-6		1.17	184392			1	1.37654	37.7	5	2022-09-30	09:33:27	2:E,7	184392
247	bedaq-20220929-D4-7		1.17	181689			1	1.35636	35.6	5	2022-09-30	09:35:56	2:E,8	181689
248	bedaq-20220929-D4-8		1.17	184908			1	1.3804	38	5	2022-09-30	09:38:27	2:F,1	184908
249	bedaq-20220929-D4-9		1.17	182225			1	1.36036	36	5	2022-09-30	09:40:54	2:F,2	182225
250	bedaq-20220929-D4-10		1.17	197244			1	1.47249	47.2	5	2022-09-30	09:43:26	2:F,3	197244
251	bedaq-20220929-D4-11		1.17	179478			1	1.33986	34	5	2022-09-30	09:45:54	2:F,4	179478
252	bedaq-20220929-D5-1		1.17	186663			1	1.3935	39.4	5	2022-09-30	09:48:27	2:F,5	186663
253	bedaq-20220929-D5-2		1.17	218151			1	1.62857	62.9	6	2022-09-30	09:50:55	2:F,6	218151
254	bedaq-20220929-D5-3		1.17	190741			1	1.42394	42.4	5	2022-09-30	09:53:27	2:F,7	190741
255	bedaq-20220929-D5-4		1.17	181742			1	1.35676	35.7	5	2022-09-30	09:55:55	2:F,8	181742
256	bedaq-20220929-D5-5		1.17	169392			1	1.26456	26.5	5	2022-09-30	09:58:27	1:A,1	169392
257	bedaq-20220929-D5-6		1.17	179612			1	1.34086	34.1	5	2022-09-30	10:00:56	1:A,2	179612
258	bedaq-20220929-D5-7		1.17	171629			1	1.28126	28.1	5	2022-09-30	10:03:27	1:A,3	171629
259	bedaq-20220929-D5-8		1.17	250905			1	1.87308	87.3	5	2022-09-30	10:06:01	1:A,4	250905
260	bedaq-20220929-D5-9		1.17	173869			1	1.29798	29.8	5	2022-09-30	10:08:34	1:A,5	173869
261	bedaq-20220929-D5-10		1.17	173774			1	1.29728	29.7	5	2022-09-30	10:11:08	1:A,6	173774
262	bedaq-20220929-D5-11		1.17	192862			1	1.43977	44	5	2022-09-30	10:13:42	1:A,7	192862
263	bedaq-20220929-D6-1		1.17	176985			1	1.32125	32.1	5	2022-09-30	10:16:11	1:A,8	176985
264	bedaq-20220929-D6-2		1.17	178622			1	1.33347	33.3	5	2022-09-30	10:18:42	1:B,1	178622
265	bedaq-20220929-D6-3		1.18	198574			1	1.48242	48.2	4	2022-09-30	10:21:16	1:B,2	198574
266	bedaq-20220929-D6-4		1.17	187025			1	1.3962	39.6	5	2022-09-30	10:23:49	1:B,3	187025
267	bedaq-20220929-D6-5		1.17	179049			1	1.33665	33.7	5	2022-09-30	10:26:18	1:B,4	179049
268	bedaq-20220929-D6-6		1.17	181222			1	1.35288	35.3	5	2022-09-30	10:28:50	1:B,5	181222
269	bedaq-20220929-D6-7		1.17	176545			1	1.31796	31.8	5	2022-09-30	10:31:23	1:B,6	176545
270	bedaq-20220929-D6-8		1.17	171439			1	1.27985	28	5	2022-09-30	10:33:52	1:B,7	171439
271	bedaq-20220929-D6-9		1.17	181391			1	1.35414	35.4	5	2022-09-30	10:36:22	1:B,8	181391
272	bedaq-20220929-D6-10		1.17	179828			1	1.34247	34.2	5	2022-09-30	10:38:56	1:C,1	179828
273	bedaq-20220929-D6-11		1.17	211499			1	1.57891	57.9	5	2022-09-30	10:41:24	1:C,2	211499
Compound 2: Bedaquiline
	Name	Sample Text	RT	Area	IS Area	Type	Std. Conc	Conc.	%Dev	S/N	Acq.Date	Acq.Time	Vial	Response
1	bedaq-20220929-S1		1.36	499	131802	Standard	0.1		-100	377	2022-09-29	17:12:18	2:A,1	0.004
2	bedaq-20220929-S2		1.36	1172	130057	Standard	1	2.1279	112.8	559	2022-09-29	17:14:48	2:A,2	0.009
3	bedaq-20220929-S3		1.36	4194	132423	Standard	10	11.542	15.4	1221	2022-09-29	17:17:21	2:A,3	0.032
4	bedaq-20220929-S4		1.36	17791	132892	Standard	50	54.0067	8	6608	2022-09-29	17:19:54	2:A,4	0.134
5	bedaq-20220929-S5		1.36	36837	134558	Standard	100	112.126	12.1	5463	2022-09-29	17:22:23	2:A,5	0.274
6	bedaq-20220929-S6		1.36	165044	141985	Standard	500	481.342	-3.7	19730	2022-09-29	17:24:53	2:A,6	1.162
7	bedaq-20220929-Meoh-3												1:F,8
8	bedaq-20220929-Meoh-4		1.36	333	665.954			206.331		77	2022-09-29	17:27:30	1:F,8	0.5
9	bedaq-20220929-A1-1		1.36	58570	152099			158.375		8529	2022-09-29	17:30:01	2:A,7	0.385
10	bedaq-20220929-A1-2		1.36	130826	149682			361.526		11698	2022-09-29	17:32:35	2:A,8	0.874
11	bedaq-20220929-A1-3		1.36	279407	150400			770.248		33785	2022-09-29	17:35:03	2:B,1	1.858
12	bedaq-20220929-A1-4		1.36	209256	147971			585.946		24001	2022-09-29	17:37:35	2:B,2	1.414
13	bedaq-20220929-A1-5		1.36	158159	143202			457.261		34290	2022-09-29	17:40:08	2:B,3	1.104
14	bedaq-20220929-A1-6		1.36	142138	151381			388.498		18096	2022-09-29	17:42:43	2:B,4	0.939
15	bedaq-20220929-A1-7		1.36	81854	139949			241.392		14642	2022-09-29	17:45:17	2:B,5	0.585
16	bedaq-20220929-A1-8		1.36	60646	143979			173.391		10314	2022-09-29	17:47:50	2:B,6	0.421
17	bedaq-20220929-A1-9		1.36	59567	144426			169.745		28546	2022-09-29	17:50:24	2:B,7	0.412
18	bedaq-20220929-A1-10		1.36	20809	144882			58.0581		1520	2022-09-29	17:52:51	2:B,8	0.144
19	bedaq-20220929-A1-11		1.36	7630	145958			20.102		2565	2022-09-29	17:55:24	2:C,1	0.052
20	bedaq-20220929-A2-1		1.36	19918	150428			53.3968		6365	2022-09-29	17:57:57	2:C,2	0.132
21	bedaq-20220929-A2-2		1.36	62200	150491			170.108		19824	2022-09-29	18:00:25	2:C,3	0.413
22	bedaq-20220929-A2-3		1.36	119551	148776			332.25		25273	2022-09-29	18:02:56	2:C,4	0.804
23	bedaq-20220929-A2-4		1.36	116160	148120			324.217		40949	2022-09-29	18:05:30	2:C,5	0.784
24	bedaq-20220929-A2-5		1.36	94307	147683			263.7		10510	2022-09-29	18:07:58	2:C,6	0.639
25	bedaq-20220929-A2-6		1.36	53446	145217			151.299		10718	2022-09-29	18:10:30	2:C,7	0.368
26	bedaq-20220929-A2-7		1.36	38124	154156			101.135		6072	2022-09-29	18:12:58	2:C,8	0.247
27	bedaq-20220929-A2-8		1.36	29612	150486			80.1391		6739	2022-09-29	18:15:28	2:D,1	0.197
28	bedaq-20220929-A2-9		1.36	21753	144715			60.8356		12315	2022-09-29	18:17:57	2:D,2	0.15
29	bedaq-20220929-A2-10		1.36	25608	142832			72.8748		6793	2022-09-29	18:20:29	2:D,3	0.179
30	bedaq-20220929-A2-11		1.36	3803	135482			10.0454		966	2022-09-29	18:22:57	2:D,4	0.028
31	bedaq-20220929-A3-1		1.36	122643	145582			348.4		41355	2022-09-29	18:25:29	2:D,5	0.842
32	bedaq-20220929-A3-2		1.36	378135	149386			1050.08		38158	2022-09-29	18:28:02	2:D,6	2.531
33	bedaq-20220929-A3-3		1.36	432210	144461			1241.46		19033	2022-09-29	18:30:36	2:D,7	2.992
34	bedaq-20220929-A3-4		1.36	206219	142589			599.275		54793	2022-09-29	18:33:10	2:D,8	1.446
35	bedaq-20220929-A3-5		1.36	211318	150049			583.521		39037	2022-09-29	18:35:38	2:E,1	1.408
36	bedaq-20220929-A3-6		1.36	151194	149936			417.351		27056	2022-09-29	18:38:10	2:E,2	1.008
37	bedaq-20220929-A3-7		1.36	105345	146253			297.652		22358	2022-09-29	18:40:43	2:E,3	0.72
38	bedaq-20220929-A3-8		1.36	44874	167815			109.484		4954	2022-09-29	18:43:11	2:E,4	0.267
39	bedaq-20220929-A3-9		1.36	70603	145873			199.478		19995	2022-09-29	18:45:43	2:E,5	0.484
40	bedaq-20220929-A3-10		1.36	23378	141232			67.1555		4701	2022-09-29	18:48:11	2:E,6	0.166
41	bedaq-20220929-A3-11		1.36	10821	147291			28.9055		3666	2022-09-29	18:50:43	2:E,7	0.073
42	bedaq-20220929-A4-1		1.36	64786	148452			179.703		19045	2022-09-29	18:53:11	2:E,8	0.436
43	bedaq-20220929-A4-2		1.36	185921	151981			506.651		17304	2022-09-29	18:55:44	2:F,1	1.223
44	bedaq-20220929-A4-3		1.36	138681	150915			380.183		14560	2022-09-29	18:58:17	2:F,2	0.919
45	bedaq-20220929-A4-4		1.36	95274	147386			266.961		23551	2022-09-29	19:00:45	2:F,3	0.646
46	bedaq-20220929-A4-5		1.36	74777	157044			196.217		16528	2022-09-29	19:03:16	2:F,4	0.476
47	bedaq-20220929-A4-6		1.36	62373	150141			170.988		8858	2022-09-29	19:05:45	2:F,5	0.415
48	bedaq-20220929-A4-7		1.36	52268	144246			148.934		5816	2022-09-29	19:08:17	2:F,6	0.362
49	bedaq-20220929-A4-8		1.36	46070	147894			127.809		8291	2022-09-29	19:10:50	2:F,7	0.312
50	bedaq-20220929-A4-9		1.36	31918	145350			89.6193		5692	2022-09-29	19:13:17	2:F,8	0.22
51	bedaq-20220929-A4-10		1.36	12407	145196			33.8863		3653	2022-09-29	19:15:51	1:A,1	0.085
52	bedaq-20220929-A4-11		1.36	4246	153486			9.87486		980	2022-09-29	19:18:23	1:A,2	0.028
53	bedaq-20220929-A5-1		1.36	16256	157875			41.1633		3179	2022-09-29	19:20:51	1:A,3	0.103
54	bedaq-20220929-A5-2		1.36	35917	152656			96.1367		3443	2022-09-29	19:23:23	1:A,4	0.235
55	bedaq-20220929-A5-3		1.36	64555	153544			173.065		22584	2022-09-29	19:25:57	1:A,5	0.42
56	bedaq-20220929-A5-4		1.36	34455	156511			89.8495		11073	2022-09-29	19:28:30	1:A,6	0.22
57	bedaq-20220929-A5-5		1.36	36058	151303			97.3997		26629	2022-09-29	19:31:04	1:A,7	0.238
58	bedaq-20220929-A5-6		1.36	25022	145585			69.7912		15461	2022-09-29	19:33:32	1:A,8	0.172
59	bedaq-20220929-A5-7		1.36	16891	150250			45.0905		3491	2022-09-29	19:36:03	1:B,1	0.112
60	bedaq-20220929-A5-8		1.36	12976	150296			34.2529		3216	2022-09-29	19:38:36	1:B,2	0.086
61	bedaq-20220929-A5-9		1.36	9883	144736			26.7537		6557	2022-09-29	19:41:10	1:B,3	0.068
62	bedaq-20220929-A5-10		1.36	4049	148338			9.72451		821	2022-09-29	19:43:43	1:B,4	0.027
63	bedaq-20220929-A5-11		1.36	1983	153205			3.76023		739	2022-09-29	19:46:17	1:B,5	0.013
64	bedaq-20220929-A6-1		1.36	40226	154985			106.221		32245	2022-09-29	19:48:50	1:B,6	0.26
65	bedaq-20220929-A6-2		1.36	88314	158213			230.304		32071	2022-09-29	19:51:24	1:B,7	0.558
66	bedaq-20220929-A6-3		1.36	525286	156810			1390.18		69724	2022-09-29	19:53:57	1:B,8	3.35
67	bedaq-20220929-A6-4		1.37	356304	155683			949.283		29174	2022-09-29	19:56:31	1:C,1	2.289
68	bedaq-20220929-A6-5		1.36	283326	154335			761.12		112576	2022-09-29	19:59:05	1:C,2	1.836
69	bedaq-20220929-A6-6		1.36	237445	151191			650.9		48540	2022-09-29	20:01:38	1:C,3	1.571
70	bedaq-20220929-A6-7		1.36	118063	159968			305.026		24809	2022-09-29	20:04:12	1:C,4	0.738
71	bedaq-20220929-A6-8		1.36	77761	152980			209.575		10799	2022-09-29	20:06:45	1:C,5	0.508
72	bedaq-20220929-A6-9		1.37	51144	161598			129.877		14371	2022-09-29	20:09:19	1:C,6	0.316
73	bedaq-20220929-A6-10		1.36	17104	156513			43.7879		11406	2022-09-29	20:11:54	1:C,7	0.109
74	bedaq-20220929-A6-11		1.36	8373	159865			20.1439		1864	2022-09-29	20:14:26	1:C,8	0.052
75	bedaq-20220929-B1-1		1.36	131739	150989			360.894		46234	2022-09-29	20:16:54	1:D,1	0.873
76	bedaq-20220929-B1-2		1.36	155271	154137			416.923		42461	2022-09-29	20:19:26	1:D,2	1.007
77	bedaq-20220929-B1-3		1.36	158674	163041			402.736		37854	2022-09-29	20:21:59	1:D,3	0.973
78	bedaq-20220929-B1-4		1.36	79935	167369			196.816		20417	2022-09-29	20:24:33	1:D,4	0.478
79	bedaq-20220929-B1-5		1.36	84167	165629			209.519		17231	2022-09-29	20:27:07	1:D,5	0.508
80	bedaq-20220929-B1-6		1.37	59503	154330			158.574		20706	2022-09-29	20:29:40	1:D,6	0.386
81	bedaq-20220929-B1-7		1.36	36170	149860			98.6625		12480	2022-09-29	20:32:14	1:D,7	0.241
82	bedaq-20220929-B1-8		1.36	29280	143094			83.4001		4006	2022-09-29	20:34:47	1:D,8	0.205
83	bedaq-20220929-B1-9		1.36	23502	155262			61.2748		9151	2022-09-29	20:37:21	1:E,1	0.151
84	bedaq-20220929-B1-10		1.36	12424	182983			26.5933		2717	2022-09-29	20:39:49	1:E,2	0.068
85	bedaq-20220929-B1-11		1.36	4552	166245			9.75923		3153	2022-09-29	20:42:21	1:E,3	0.027
86	bedaq-20220929-B2-1		1.36	142517	167960			350.929		27078	2022-09-29	20:44:54	1:E,4	0.849
87	bedaq-20220929-B2-2		1.36	387225	161933			991.913		62441	2022-09-29	20:47:29	1:E,5	2.391
88	bedaq-20220929-B2-3		1.37	199968	162070			511.024		26553	2022-09-29	20:50:02	1:E,6	1.234
89	bedaq-20220929-B2-4		1.36	144468	163095			366.415		31939	2022-09-29	20:52:36	1:E,7	0.886
90	bedaq-20220929-B2-5		1.36	130667	147435			366.612		16886	2022-09-29	20:55:04	1:E,8	0.886
91	bedaq-20220929-B2-6		1.37	119263	164227			300.109		17313	2022-09-29	20:57:39	1:F,1	0.726
92	bedaq-20220929-B2-7		1.36	96059	164708			240.696		19436	2022-09-29	21:00:12	1:F,2	0.583
93	bedaq-20220929-B2-8		1.37	78033	172053			186.82		16841	2022-09-29	21:02:46	1:F,3	0.454
94	bedaq-20220929-B2-9		1.37	56666	159826			145.692		10650	2022-09-29	21:05:19	1:F,4	0.355
95	bedaq-20220929-B2-10		1.36	20827	166052			50.4953		7145	2022-09-29	21:07:48	1:F,5	0.125
96	bedaq-20220929-B2-11		1.37	7485	164388			17.301		3167	2022-09-29	21:10:19	1:F,6	0.046
97	bedaq-20220929-B3-1		1.36	163625	167848			403.411		38875	2022-09-29	21:12:49	1:F,7	0.975
98	bedaq-20220929-B3-2		1.36	419246	175056			993.437		59603	2022-09-29	21:15:21	2:A,1	2.395
99	bedaq-20220929-B3-3		1.37	283916	180357			652.433		28551	2022-09-29	21:17:53	2:A,2	1.574
100	bedaq-20220929-B3-4		1.36	181359	173934			431.603		58415	2022-09-29	21:20:26	2:A,3	1.043
101	bedaq-20220929-B3-5		1.36	173311	179680			399.139		23398	2022-09-29	21:23:00	2:A,4	0.965
102	bedaq-20220929-B3-6		1.36	129187	172589			309.382		24526	2022-09-29	21:25:33	2:A,5	0.749
103	bedaq-20220929-B3-7		1.36	71029	165374			176.835		11869	2022-09-29	21:28:08	2:A,6	0.43
104	bedaq-20220929-B3-8		1.36	70355	166991			173.43		21824	2022-09-29	21:30:42	2:A,7	0.421
105	bedaq-20220929-B3-9		1.36	46885	173380			110.735		32186	2022-09-29	21:33:10	2:A,8	0.27
106	bedaq-20220929-B3-10		1.36	16470	166638			39.4464		4921	2022-09-29	21:35:42	2:B,1	0.099
107	bedaq-20220929-B3-11		1.37	5617	175470			11.6829		1965	2022-09-29	21:38:15	2:B,2	0.032
108	bedaq-20220929-B4-1		1.36	69290	168591			169.144		10534	2022-09-29	21:40:49	2:B,3	0.411
109	bedaq-20220929-B4-2		1.37	81575	183223			183.366		50977	2022-09-29	21:43:16	2:B,4	0.445
110	bedaq-20220929-B4-3		1.36	87234	180619			199.05		16854	2022-09-29	21:45:51	2:B,5	0.483
111	bedaq-20220929-B4-4		1.37	71252	191736			152.783		49862	2022-09-29	21:48:24	2:B,6	0.372
112	bedaq-20220929-B4-5		1.37	52667	176764			122.175		43806	2022-09-29	21:50:57	2:B,7	0.298
113	bedaq-20220929-B4-6		1.36	34870	177121			80.1792		15437	2022-09-29	21:53:27	2:B,8	0.197
114	bedaq-20220929-B4-7		1.36	24576	161504			61.6075		8231	2022-09-29	21:55:57	2:C,1	0.152
115	bedaq-20220929-B4-8		1.37	17501	184087			37.8831		3288	2022-09-29	21:58:30	2:C,2	0.095
116	bedaq-20220929-B4-9		1.36	16372	184600			35.2323		5144	2022-09-29	22:00:58	2:C,3	0.089
117	bedaq-20220929-B4-10		1.36	6476	176755			13.6045		3426	2022-09-29	22:03:35	2:C,4	0.037
118	bedaq-20220929-B4-11		1.36	2670	180261			4.5362		180	2022-09-29	22:06:10	2:C,5	0.015
119	bedaq-20220929-B5-1		1.36	320948	188412			706.132		50653	2022-09-29	22:08:44	2:C,6	1.703
120	bedaq-20220929-B5-2		1.37	370305	181714			845.074		45677	2022-09-29	22:11:17	2:C,7	2.038
121	bedaq-20220929-B5-3		1.37	201074	191682			434.224		28969	2022-09-29	22:13:45	2:C,8	1.049
122	bedaq-20220929-B5-4		1.36	127985	182700			289.437		12600	2022-09-29	22:16:20	2:D,1	0.701
123	bedaq-20220929-B5-5		1.36	106075	184760			236.921		30498	2022-09-29	22:18:48	2:D,2	0.574
124	bedaq-20220929-B5-6		1.36	65657	184926			145.897		10781	2022-09-29	22:21:20	2:D,3	0.355
125	bedaq-20220929-B5-7		1.37	52992	170897			127.216		28320	2022-09-29	22:23:53	2:D,4	0.31
126	bedaq-20220929-B5-8		1.36	39775	179911			90.2389		21504	2022-09-29	22:26:21	2:D,5	0.221
127	bedaq-20220929-B5-9		1.36	36210	179518			82.1883		12087	2022-09-29	22:28:53	2:D,6	0.202
128	bedaq-20220929-B5-10		1.36	14676	180645			32.136		3429	2022-09-29	22:31:26	2:D,7	0.081
129	bedaq-20220929-B5-11		1.36	3694	161116			7.90819		1260	2022-09-29	22:33:54	2:D,8	0.023
130	bedaq-20220929-B6-1		1.36	241454	201117			497.198		58045	2022-09-29	22:36:25	2:E,1	1.201
131	bedaq-20220929-B6-2		1.36	313827	203832			638.075		70606	2022-09-29	22:38:59	2:E,2	1.54
132	bedaq-20220929-B6-3		1.36	369625	179182			855.461		23175	2022-09-29	22:41:26	2:E,3	2.063
133	bedaq-20220929-B6-4		1.36	448632	194383			957.308		235607	2022-09-29	22:43:58	2:E,4	2.308
134	bedaq-20220929-B6-5		1.37	475266	178375			1105.41		35466	2022-09-29	22:46:31	2:E,5	2.664
135	bedaq-20220929-B6-6		1.36	302896	181105			693.276		42876	2022-09-29	22:49:00	2:E,6	1.672
136	bedaq-20220929-B6-7		1.36	173441	173034			414.844		25841	2022-09-29	22:51:32	2:E,7	1.002
137	bedaq-20220929-B6-8		1.37	155091	173970			368.777		37165	2022-09-29	22:54:00	2:E,8	0.891
138	bedaq-20220929-B6-9		1.36	120303	172875			287.516		26761	2022-09-29	22:56:32	2:F,1	0.696
139	bedaq-20220929-B6-10		1.36	47791	184277			106.135		12632	2022-09-29	22:59:05	2:F,2	0.259
140	bedaq-20220929-B6-11		1.37	18887	185750			40.6295		7720	2022-09-29	23:01:33	2:F,3	0.102
141	bedaq-20220929-C1-1		1.36	39867	176303			92.3339		3672	2022-09-29	23:04:05	2:F,4	0.226
142	bedaq-20220929-C1-2		1.37	110663	178765			255.584		10033	2022-09-29	23:06:38	2:F,5	0.619
143	bedaq-20220929-C1-3		1.38	210786	219314			397.709		36392	2022-09-29	23:09:06	2:F,6	0.961
144	bedaq-20220929-C1-4		1.36	166402	184403			373.307		63515	2022-09-29	23:11:38	2:F,7	0.902
145	bedaq-20220929-C1-5		1.37	48175	195502			100.765		15484	2022-09-29	23:14:07	2:F,8	0.246
146	bedaq-20220929-C1-6		1.36	698930	181570			1597.73		240168	2022-09-29	23:16:42	1:A,1	3.849
147	bedaq-20220929-C1-7		1.36	399886	184575			898.538		60026	2022-09-29	23:19:17	1:A,2	2.167
148	bedaq-20220929-C1-8		1.36	231608	199945			479.66		33486	2022-09-29	23:21:50	1:A,3	1.158
149	bedaq-20220929-C1-9		1.36	140446	189514			306.291		30975	2022-09-29	23:24:18	1:A,4	0.741
150	bedaq-20220929-C1-10		1.36	42919	192631			90.9546		9528	2022-09-29	23:26:50	1:A,5	0.223
151	bedaq-20220929-C1-11		1.37	19856	201426			39.3387		3404	2022-09-29	23:29:23	1:A,6	0.099
152	bedaq-20220929-C2-1		1.36	41413	187984			89.9143		4643	2022-09-29	23:31:57	1:A,7	0.22
153	bedaq-20220929-C2-2		1.37	215912	189655			471.388		134675	2022-09-29	23:34:31	1:A,8	1.138
154	bedaq-20220929-C2-3		1.36	424112	197490			890.637		82247	2022-09-29	23:36:59	1:B,1	2.148
155	bedaq-20220929-C2-4		1.36	527291	183900			1189.69		83678	2022-09-29	23:39:29	1:B,2	2.867
156	bedaq-20220929-C2-5		1.37	396153	206587			795.116		137648	2022-09-29	23:42:03	1:B,3	1.918
157	bedaq-20220929-C2-6		1.36	260031	179791			599.294		107752	2022-09-29	23:44:37	1:B,4	1.446
158	bedaq-20220929-C2-7		1.36	155437	187139			343.483		37507	2022-09-29	23:47:10	1:B,5	0.831
159	bedaq-20220929-C2-8		1.37	139073	184997			310.726		38121	2022-09-29	23:49:44	1:B,6	0.752
160	bedaq-20220929-C2-9		1.36	87583	184088			196.055		25462	2022-09-29	23:52:17	1:B,7	0.476
161	bedaq-20220929-C2-10		1.36	22852	183362			50.1634		7797	2022-09-29	23:54:51	1:B,8	0.125
162	bedaq-20220929-C2-11		1.36	12002	182343			25.7308		2470	2022-09-29	23:57:19	1:C,1	0.066
163	bedaq-20220929-C3-1		1.36	30926	198316			63.1739		7380	2022-09-29	23:59:51	1:C,2	0.156
164	bedaq-20220929-C3-2		1.36	98126	189723			213.273		13658	2022-09-30	00:02:24	1:C,3	0.517
165	bedaq-20220929-C3-3		1.36	70995	193423			150.883		17897	2022-09-30	00:04:58	1:C,4	0.367
166	bedaq-20220929-C3-4		1.36	60600	193844			128.272		17347	2022-09-30	00:07:32	1:C,5	0.313
167	bedaq-20220929-C3-5		1.36	197915	192408			425.757		33246	2022-09-30	00:10:06	1:C,6	1.029
168	bedaq-20220929-C3-6		1.36	37147	200338			75.4212		8828	2022-09-30	00:12:40	1:C,7	0.185
169	bedaq-20220929-C3-7		1.36	26271	181492			58.5237		4752	2022-09-30	00:15:13	1:C,8	0.145
170	bedaq-20220929-C3-8		1.36	12573	209909			23.2679		2650	2022-09-30	00:17:47	1:D,1	0.06
171	bedaq-20220929-C3-9		1.36	16541	195481			33.5388		5082	2022-09-30	00:20:20	1:D,2	0.085
172	bedaq-20220929-C3-10		1.36	4876	218597			7.65035		1002	2022-09-30	00:22:54	1:D,3	0.022
173	bedaq-20220929-C3-11		1.36	4811	190486			8.87675		1154	2022-09-30	00:25:22	1:D,4	0.025
174	bedaq-20220929-C4-1		1.36	24040	186077			52.06		4203	2022-09-30	00:27:53	1:D,5	0.129
175	bedaq-20220929-C4-2		1.36	101687	202821			206.69		55122	2022-09-30	00:30:26	1:D,6	0.501
176	bedaq-20220929-C4-3		1.36	372304	183703			840.428		54452	2022-09-30	00:33:00	1:D,7	2.027
177	bedaq-20220929-C4-4		1.36	546391	188327			1203.82		59476	2022-09-30	00:35:29	1:D,8	2.901
178	bedaq-20220929-C4-5		1.36	568325	188830			1248.87		87230	2022-09-30	00:37:59	1:E,1	3.01
179	bedaq-20220929-C4-6		1.36	837812	181290			1918.49		75448	2022-09-30	00:40:32	1:E,2	4.621
180	bedaq-20220929-C4-7		1.36	439676	186367			978.587		49456	2022-09-30	00:43:06	1:E,3	2.359
181	bedaq-20220929-C4-8		1.36	274633	191654			593.755		62869	2022-09-30	00:45:39	1:E,4	1.433
182	bedaq-20220929-C4-9		1.36	186621	190001			406.476		57459	2022-09-30	00:48:13	1:E,5	0.982
183	bedaq-20220929-C4-10		1.37	50220	194038			105.917		6635	2022-09-30	00:50:46	1:E,6	0.259
184	bedaq-20220929-C4-11		1.36	24918	192485			52.1683		7499	2022-09-30	00:53:20	1:E,7	0.129
185	bedaq-20220929-C5-1		1.36	33767	209765			65.265		8763	2022-09-30	00:55:49	1:E,8	0.161
186	bedaq-20220929-C5-2		1.36	71841	191141			154.543		7089	2022-09-30	00:58:19	1:F,1	0.376
187	bedaq-20220929-C5-3		1.36	161523	191340			349.121		38448	2022-09-30	01:00:48	1:F,2	0.844
188	bedaq-20220929-C5-4		1.36	172315	199313			357.588		55339	2022-09-30	01:03:18	1:F,3	0.865
189	bedaq-20220929-C5-5		1.36	153267	199111			318.203		21566	2022-09-30	01:05:52	1:F,4	0.77
190	bedaq-20220929-C5-6		1.36	561862	206499			1128.87		69411	2022-09-30	01:08:25	1:F,5	2.721
191	bedaq-20220929-C5-7		1.37	218285	190303			474.959		88978	2022-09-30	01:10:58	1:F,6	1.147
192	bedaq-20220929-C5-8		1.36	178082	195747			376.372		22281	2022-09-30	01:13:27	1:F,7	0.91
193	bedaq-20220929-C5-9		1.36	112366	189823			244.33		25225	2022-09-30	01:15:57	2:A,1	0.592
194	bedaq-20220929-C5-10		1.37	34611	203070			69.1961		8059	2022-09-30	01:18:26	2:A,2	0.17
195	bedaq-20220929-C5-11		1.36	19118	217333			34.9301		3019	2022-09-30	01:20:57	2:A,3	0.088
196	bedaq-20220929-C6-1		1.36	153357	189232			335.098		30416	2022-09-30	01:23:30	2:A,4	0.81
197	bedaq-20220929-C6-2		1.36	299323	184076			673.992		150004	2022-09-30	01:26:04	2:A,5	1.626
198	bedaq-20220929-C6-3		1.36	759995	200554			1572.85		237077	2022-09-30	01:28:38	2:A,6	3.789
199	bedaq-20220929-C6-4		1.37	513497	199171			1069.57		93758	2022-09-30	01:31:11	2:A,7	2.578
200	bedaq-20220929-C6-5		1.37	406858	193253			873.104		28430	2022-09-30	01:33:45	2:A,8	2.105
201	bedaq-20220929-C6-6		1.36	384058	186743			852.872		52037	2022-09-30	01:36:20	2:B,1	2.057
202	bedaq-20220929-C6-7		1.37	221271	189642			483.164		41353	2022-09-30	01:38:48	2:B,2	1.167
203	bedaq-20220929-C6-8		1.36	179913	185717			400.881		36351	2022-09-30	01:41:19	2:B,3	0.969
204	bedaq-20220929-C6-9		1.36	139790	193695			298.238		37305	2022-09-30	01:43:53	2:B,4	0.722
205	bedaq-20220929-C6-10		1.36	65787	195655			138.085		10378	2022-09-30	01:46:26	2:B,5	0.336
206	bedaq-20220929-C6-11		1.36	44106	185434			97.206		10145	2022-09-30	01:48:54	2:B,6	0.238
207	bedaq-20220929-C6-12		1.36	1	1.16			284.207		2	2022-09-30	01:51:25	1:F,8	0.688
208	bedaq-20220929-D1-1		1.35	249711	214803			481.388		21655	2022-09-30	07:57:24	2:A,1	1.163
209	bedaq-20220929-D1-2		1.35	538744	178434			1252.85		65943	2022-09-30	07:59:56	2:A,2	3.019
210	bedaq-20220929-D1-3		1.35	261034	191730			564.049		26327	2022-09-30	08:02:29	2:A,3	1.361
211	bedaq-20220929-D1-4		1.35	162734	175056			384.619		51749	2022-09-30	08:05:03	2:A,4	0.93
212	bedaq-20220929-D1-5		1.35	140683	185345			313.748		13378	2022-09-30	08:07:36	2:A,5	0.759
213	bedaq-20220929-D1-6		1.35	156011	190108			339.345		14854	2022-09-30	08:10:10	2:A,6	0.821
214	bedaq-20220929-D1-7		1.35	94703	200243			194.881		31050	2022-09-30	08:12:43	2:A,7	0.473
215	bedaq-20220929-D1-8		1.35	82712	192522			176.885		16198	2022-09-30	08:15:12	2:A,8	0.43
216	bedaq-20220929-D1-9		1.35	51791	178873			118.682		26977	2022-09-30	08:17:43	2:B,1	0.29
217	bedaq-20220929-D1-10		1.35	16001	182736			34.763		4459	2022-09-30	08:20:16	2:B,2	0.088
218	bedaq-20220929-D1-11		1.35	9280	187237			18.9744		1766	2022-09-30	08:22:50	2:B,3	0.05
219	bedaq-20220929-D2-1		1.35	332562	188772			730.344		54409	2022-09-30	08:25:18	2:B,4	1.762
220	bedaq-20220929-D2-2		1.35	564703	199210			1176.16		127385	2022-09-30	08:27:50	2:B,5	2.835
221	bedaq-20220929-D2-3		1.35	441283	185764			985.365		32808	2022-09-30	08:30:23	2:B,6	2.376
222	bedaq-20220929-D2-4		1.35	367112	184399			825.551		43774	2022-09-30	08:32:57	2:B,7	1.991
223	bedaq-20220929-D2-5		1.35	281434	181420			642.916		57100	2022-09-30	08:35:30	2:B,8	1.551
224	bedaq-20220929-D2-6		1.35	234661	239452			405.552		34398	2022-09-30	08:37:58	2:C,1	0.98
225	bedaq-20220929-D2-7		1.35	119252	189081			260.425		41146	2022-09-30	08:40:30	2:C,2	0.631
226	bedaq-20220929-D2-8		1.35	86919	187302			191.191		15205	2022-09-30	08:43:03	2:C,3	0.464
227	bedaq-20220929-D2-9		1.35	66289	190966			142.608		31769	2022-09-30	08:45:32	2:C,4	0.347
228	bedaq-20220929-D2-10		1.35	14032	176535			31.4084		2461	2022-09-30	08:48:02	2:C,5	0.079
229	bedaq-20220929-D2-11		1.34	8989	193230			17.7114		2928	2022-09-30	08:50:31	2:C,6	0.047
230	bedaq-20220929-D3-1		1.35	164470	188544			360.815		72487	2022-09-30	08:53:03	2:C,7	0.872
231	bedaq-20220929-D3-2		1.35	382137	186334			850.465		55411	2022-09-30	08:55:36	2:C,8	2.051
232	bedaq-20220929-D3-3		1.35	627007	211082			1232.55		111624	2022-09-30	08:58:10	2:D,1	2.97
233	bedaq-20220929-D3-4		1.35	362721	181658			827.99		53662	2022-09-30	09:00:43	2:D,2	1.997
234	bedaq-20220929-D3-5		1.35	368094	170149			897.225		30053	2022-09-30	09:03:10	2:D,3	2.163
235	bedaq-20220929-D3-6		1.35	321562	176915			753.566		213895	2022-09-30	09:05:43	2:D,4	1.818
236	bedaq-20220929-D3-7		1.35	194123	183912			436.935		47458	2022-09-30	09:08:10	2:D,5	1.056
237	bedaq-20220929-D3-8		1.35	162179	179157			374.491		45772	2022-09-30	09:10:45	2:D,6	0.905
238	bedaq-20220929-D3-9		1.35	129144	180196			296.155		21569	2022-09-30	09:13:19	2:D,7	0.717
239	bedaq-20220929-D3-10		1.35	54403	177422			125.783		14025	2022-09-30	09:15:52	2:D,8	0.307
240	bedaq-20220929-D3-11		1.35	17786	178833			39.7051		6955	2022-09-30	09:18:20	2:E,1	0.099
241	bedaq-20220929-D4-1		1.35	33027	190421			70.4441		7203	2022-09-30	09:20:55	2:E,2	0.173
242	bedaq-20220929-D4-2		1.35	81827	177996			189.386		11688	2022-09-30	09:23:23	2:E,3	0.46
243	bedaq-20220929-D4-3		1.35	87935	181960			199.171		21134	2022-09-30	09:25:54	2:E,4	0.483
244	bedaq-20220929-D4-4		1.35	60444	183586			135.176		24333	2022-09-30	09:28:28	2:E,5	0.329
245	bedaq-20220929-D4-5		1.36	39903	186933			87.073		8925	2022-09-30	09:30:56	2:E,6	0.213
246	bedaq-20220929-D4-6		1.35	48327	184392			107.276		7713	2022-09-30	09:33:27	2:E,7	0.262
247	bedaq-20220929-D4-7		1.35	24698	181689			54.8615		3831	2022-09-30	09:35:56	2:E,8	0.136
248	bedaq-20220929-D4-8		1.35	17842	184908			38.4734		12037	2022-09-30	09:38:27	2:F,1	0.096
249	bedaq-20220929-D4-9		1.35	14815	182225			32.1609		1967	2022-09-30	09:40:54	2:F,2	0.081
250	bedaq-20220929-D4-10		1.35	5571	197244			10.1177		838	2022-09-30	09:43:26	2:F,3	0.028
251	bedaq-20220929-D4-11		1.35	3426	179478			6.3132		2927	2022-09-30	09:45:54	2:F,4	0.019
252	bedaq-20220929-D5-1		1.35	285928	186663			634.812		17007	2022-09-30	09:48:27	2:F,5	1.532
253	bedaq-20220929-D5-2		1.35	442125	218151			840.439		276228	2022-09-30	09:50:55	2:F,6	2.027
254	bedaq-20220929-D5-3		1.35	503056	190741			1094.17		117191	2022-09-30	09:53:27	2:F,7	2.637
255	bedaq-20220929-D5-4		1.35	223767	181742			509.939		78366	2022-09-30	09:55:55	2:F,8	1.231
256	bedaq-20220929-D5-5		1.36	176736	169392			431.879		12744	2022-09-30	09:58:27	1:A,1	1.043
257	bedaq-20220929-D5-6		1.36	150648	179612			346.867		16212	2022-09-30	10:00:56	1:A,2	0.839
258	bedaq-20220929-D5-7		1.36	101001	171629			242.89		15436	2022-09-30	10:03:27	1:A,3	0.588
259	bedaq-20220929-D5-8		1.36	113475	250905			186.29		24416	2022-09-30	10:06:01	1:A,4	0.452
260	bedaq-20220929-D5-9		1.36	56882	173869			134.31		34264	2022-09-30	10:08:34	1:A,5	0.327
261	bedaq-20220929-D5-10		1.36	22956	173774			53.269		7823	2022-09-30	10:11:08	1:A,6	0.132
262	bedaq-20220929-D5-11		1.36	10181	192862			20.3155		3415	2022-09-30	10:13:42	1:A,7	0.053
263	bedaq-20220929-D6-1		1.36	139986	176985			327.008		31734	2022-09-30	10:16:11	1:A,8	0.791
264	bedaq-20220929-D6-2		1.36	20196	178622			45.3602		3413	2022-09-30	10:18:42	1:B,1	0.113
265	bedaq-20220929-D6-3		1.36	22295	198574			45.0313		6161	2022-09-30	10:21:16	1:B,2	0.112
266	bedaq-20220929-D6-4		1.36	20713	187025			44.3964		3865	2022-09-30	10:23:49	1:B,3	0.111
267	bedaq-20220929-D6-5		1.36	20811	179049			46.6743		6861	2022-09-30	10:26:18	1:B,4	0.116
268	bedaq-20220929-D6-6		1.36	43130	181222			97.2657		9465	2022-09-30	10:28:50	1:B,5	0.238
269	bedaq-20220929-D6-7		1.36	20515	176545			46.6637		6044	2022-09-30	10:31:23	1:B,6	0.116
270	bedaq-20220929-D6-8		1.36	15359	171439			35.6045		3488	2022-09-30	10:33:52	1:B,7	0.09
271	bedaq-20220929-D6-9		1.36	9247	181391			19.5638		1960	2022-09-30	10:36:22	1:B,8	0.051
272	bedaq-20220929-D6-10		1.36	6265	179828			12.8566		2276	2022-09-30	10:38:56	1:C,1	0.035
273	bedaq-20220929-D6-11		1.36	2993	211499			4.26296		573	2022-09-30	10:41:24	1:C,2	0.014
Compound 3: M2
	Name	Sample Text	RT	Area	IS Area	Type	Std. Conc	Conc.	%Dev	S/N	Acq.Date	Acq.Time	Vial	Response
1	bedaq-20220929-S1		1.36	702	131802	Standard	0.1	0.04306	-56.9	231	2022-09-29	17:12:18	2:A,1	0.005
2	bedaq-20220929-S2		1.36	5481	130057	Standard	1	1.2766	27.7	741	2022-09-29	17:14:48	2:A,2	0.042
3	bedaq-20220929-S3		1.36	44908	132423	Standard	10	11.2268	12.3	10852	2022-09-29	17:17:21	2:A,3	0.339
4	bedaq-20220929-S4		1.35	211305	132892	Standard	50	53.1384	6.3	26113	2022-09-29	17:19:54	2:A,4	1.59
5	bedaq-20220929-S5		1.35	460631	134558	Standard	100	114.56	14.6	111467	2022-09-29	17:22:23	2:A,5	3.423
6	bedaq-20220929-S6		1.36	2038335	141985	Standard	500	480.855	-3.8	117115	2022-09-29	17:24:53	2:A,6	14.356
7	bedaq-20220929-Meoh-3												1:F,8
8	bedaq-20220929-Meoh-4		1.35	4048	665.954			203.534		329	2022-09-29	17:27:30	1:F,8	6.079
9	bedaq-20220929-A1-1		1.36	1738	152099			0.2475		248	2022-09-29	17:30:01	2:A,7	0.011
10	bedaq-20220929-A1-2		1.36	6023	149682			1.21288		1150	2022-09-29	17:32:35	2:A,8	0.04
11	bedaq-20220929-A1-3		1.35	45458	150400			9.99123		7944	2022-09-29	17:35:03	2:B,1	0.302
12	bedaq-20220929-A1-4		1.36	108819	147971			24.504		19605	2022-09-29	17:37:35	2:B,2	0.735
13	bedaq-20220929-A1-5		1.36	130064	143202			30.2953		31880	2022-09-29	17:40:08	2:B,3	0.908
14	bedaq-20220929-A1-6		1.35	285074	151381			62.9589		35535	2022-09-29	17:42:43	2:B,4	1.883
15	bedaq-20220929-A1-7		1.35	276894	139949			66.1542		59467	2022-09-29	17:45:17	2:B,5	1.979
16	bedaq-20220929-A1-8		1.35	316615	143979			73.5425		34215	2022-09-29	17:47:50	2:B,6	2.199
17	bedaq-20220929-A1-9		1.35	355081	144426			82.2379		32363	2022-09-29	17:50:24	2:B,7	2.459
18	bedaq-20220929-A1-10		1.36	240349	144882			55.4465		75034	2022-09-29	17:52:51	2:B,8	1.659
19	bedaq-20220929-A1-11		1.36	134343	145958			30.7028		18981	2022-09-29	17:55:24	2:C,1	0.92
20	bedaq-20220929-A2-1		1.36	1145	150428			0.1196		286	2022-09-29	17:57:57	2:C,2	0.008
21	bedaq-20220929-A2-2		1.35	5146	150491			1.01033		905	2022-09-29	18:00:25	2:C,3	0.034
22	bedaq-20220929-A2-3		1.36	26739	148776			5.88645		4885	2022-09-29	18:02:56	2:C,4	0.18
23	bedaq-20220929-A2-4		1.36	61805	148120			13.8449		14425	2022-09-29	18:05:30	2:C,5	0.417
24	bedaq-20220929-A2-5		1.36	70971	147683			15.9656		9253	2022-09-29	18:07:58	2:C,6	0.481
25	bedaq-20220929-A2-6		1.36	98571	145217			22.607		15739	2022-09-29	18:10:30	2:C,7	0.679
26	bedaq-20220929-A2-7		1.36	128498	154156			27.7928		14754	2022-09-29	18:12:58	2:C,8	0.834
27	bedaq-20220929-A2-8		1.36	123937	150486			27.4583		21405	2022-09-29	18:15:28	2:D,1	0.824
28	bedaq-20220929-A2-9		1.35	114722	144715			26.4253		18416	2022-09-29	18:17:57	2:D,2	0.793
29	bedaq-20220929-A2-10		1.36	73514	142832			17.1091		14532	2022-09-29	18:20:29	2:D,3	0.515
30	bedaq-20220929-A2-11		1.35	23493	135482			5.67448		3627	2022-09-29	18:22:57	2:D,4	0.173
31	bedaq-20220929-A3-1		1.36	2714	145582			0.48917		693	2022-09-29	18:25:29	2:D,5	0.019
32	bedaq-20220929-A3-2		1.35	20687	149386			4.50447		7031	2022-09-29	18:28:02	2:D,6	0.138
33	bedaq-20220929-A3-3		1.36	70365	144461			16.1843		16498	2022-09-29	18:30:36	2:D,7	0.487
34	bedaq-20220929-A3-4		1.36	86463	142589			20.1813		13047	2022-09-29	18:33:10	2:D,8	0.606
35	bedaq-20220929-A3-5		1.36	140324	150049			31.1979		35826	2022-09-29	18:35:38	2:E,1	0.935
36	bedaq-20220929-A3-6		1.36	229793	149936			51.2139		25683	2022-09-29	18:38:10	2:E,2	1.533
37	bedaq-20220929-A3-7		1.35	286109	146253			65.4081		53949	2022-09-29	18:40:43	2:E,3	1.956
38	bedaq-20220929-A3-8		1.35	196924	167815			39.1807		42497	2022-09-29	18:43:11	2:E,4	1.173
39	bedaq-20220929-A3-9		1.36	299754	145873			68.713		38505	2022-09-29	18:45:43	2:E,5	2.055
40	bedaq-20220929-A3-10		1.35	221931	141232			52.5134		18467	2022-09-29	18:48:11	2:E,6	1.571
41	bedaq-20220929-A3-11		1.36	102922	147291			23.2766		15006	2022-09-29	18:50:43	2:E,7	0.699
42	bedaq-20220929-A4-1		1.35	3274	148452			0.60356		519	2022-09-29	18:53:11	2:E,8	0.022
43	bedaq-20220929-A4-2		1.35	13871	151981			2.92267		3137	2022-09-29	18:55:44	2:F,1	0.091
44	bedaq-20220929-A4-3		1.36	40152	150915			8.77869		8185	2022-09-29	18:58:17	2:F,2	0.266
45	bedaq-20220929-A4-4		1.36	70534	147386			15.8989		10940	2022-09-29	19:00:45	2:F,3	0.479
46	bedaq-20220929-A4-5		1.36	70473	157044			14.8997		20699	2022-09-29	19:03:16	2:F,4	0.449
47	bedaq-20220929-A4-6		1.36	110187	150141			24.4534		17765	2022-09-29	19:05:45	2:F,5	0.734
48	bedaq-20220929-A4-7		1.35	150664	144246			34.86		20935	2022-09-29	19:08:17	2:F,6	1.044
49	bedaq-20220929-A4-8		1.36	161810	147894			36.5217		45807	2022-09-29	19:10:50	2:F,7	1.094
50	bedaq-20220929-A4-9		1.36	139046	145350			31.916		37243	2022-09-29	19:13:17	2:F,8	0.957
51	bedaq-20220929-A4-10		1.36	90256	145196			20.6917		14854	2022-09-29	19:15:51	1:A,1	0.622
52	bedaq-20220929-A4-11		1.36	34149	153486			7.31903		8531	2022-09-29	19:18:23	1:A,2	0.222
53	bedaq-20220929-A5-1		1.36	975	157875			0.07165		251	2022-09-29	19:20:51	1:A,3	0.006
54	bedaq-20220929-A5-2		1.36	4347	152656			0.81876		1158	2022-09-29	19:23:23	1:A,4	0.028
55	bedaq-20220929-A5-3		1.36	17762	153544			3.74048		6004	2022-09-29	19:25:57	1:A,5	0.116
56	bedaq-20220929-A5-4		1.36	24725	156511			5.1575		7967	2022-09-29	19:28:30	1:A,6	0.158
57	bedaq-20220929-A5-5		1.36	39297	151303			8.56657		10085	2022-09-29	19:31:04	1:A,7	0.26
58	bedaq-20220929-A5-6		1.36	61928	145585			14.1165		6788	2022-09-29	19:33:32	1:A,8	0.425
59	bedaq-20220929-A5-7		1.36	66888	150250			14.7802		21545	2022-09-29	19:36:03	1:B,1	0.445
60	bedaq-20220929-A5-8		1.36	68243	150296			15.0777		13945	2022-09-29	19:38:36	1:B,2	0.454
61	bedaq-20220929-A5-9		1.36	60934	144736			13.97		11879	2022-09-29	19:41:10	1:B,3	0.421
62	bedaq-20220929-A5-10		1.36	36946	148338			8.2095		8057	2022-09-29	19:43:43	1:B,4	0.249
63	bedaq-20220929-A5-11		1.36	13765	153205			2.87504		4095	2022-09-29	19:46:17	1:B,5	0.09
64	bedaq-20220929-A6-1		1.36	1623	154985			0.21562		783	2022-09-29	19:48:50	1:B,6	0.01
65	bedaq-20220929-A6-2		1.36	8747	158213			1.71693		1355	2022-09-29	19:51:24	1:B,7	0.055
66	bedaq-20220929-A6-3		1.36	50981	156810			10.7575		12118	2022-09-29	19:53:57	1:B,8	0.325
67	bedaq-20220929-A6-4		1.36	137603	155683			29.4783		20126	2022-09-29	19:56:31	1:C,1	0.884
68	bedaq-20220929-A6-5		1.36	196725	154335			42.5715		21504	2022-09-29	19:59:05	1:C,2	1.275
69	bedaq-20220929-A6-6		1.36	403872	151191			89.3644		71232	2022-09-29	20:01:38	1:C,3	2.671
70	bedaq-20220929-A6-7		1.36	382467	159968			79.9707		74770	2022-09-29	20:04:12	1:C,4	2.391
71	bedaq-20220929-A6-8		1.36	363593	152980			79.496		48608	2022-09-29	20:06:45	1:C,5	2.377
72	bedaq-20220929-A6-9		1.36	312679	161598			64.6932		48143	2022-09-29	20:09:19	1:C,6	1.935
73	bedaq-20220929-A6-10		1.36	202459	156513			43.2048		72804	2022-09-29	20:11:54	1:C,7	1.294
74	bedaq-20220929-A6-11		1.36	102131	159865			21.2693		25017	2022-09-29	20:14:26	1:C,8	0.639
75	bedaq-20220929-B1-1		1.36	2673	150989			0.4579		740	2022-09-29	20:16:54	1:D,1	0.018
76	bedaq-20220929-B1-2		1.36	8183	154137			1.64346		1458	2022-09-29	20:19:26	1:D,2	0.053
77	bedaq-20220929-B1-3		1.36	36221	163041			7.30797		9247	2022-09-29	20:21:59	1:D,3	0.222
78	bedaq-20220929-B1-4		1.36	38228	167369			7.51737		9856	2022-09-29	20:24:33	1:D,4	0.228
79	bedaq-20220929-B1-5		1.36	55429	165629			11.0772		9438	2022-09-29	20:27:07	1:D,5	0.335
80	bedaq-20220929-B1-6		1.37	99612	154330			21.49		21470	2022-09-29	20:29:40	1:D,6	0.645
81	bedaq-20220929-B1-7		1.36	113939	149860			25.3382		31999	2022-09-29	20:32:14	1:D,7	0.76
82	bedaq-20220929-B1-8		1.36	118150	143094			27.5288		24514	2022-09-29	20:34:47	1:D,8	0.826
83	bedaq-20220929-B1-9		1.36	124855	155262			26.8076		11721	2022-09-29	20:37:21	1:E,1	0.804
84	bedaq-20220929-B1-10		1.36	100500	182983			18.2665		12058	2022-09-29	20:39:49	1:E,2	0.549
85	bedaq-20220929-B1-11		1.36	37143	166245			7.35035		5829	2022-09-29	20:42:21	1:E,3	0.223
86	bedaq-20220929-B2-1		1.36	4237	167960			0.70984		1127	2022-09-29	20:44:54	1:E,4	0.025
87	bedaq-20220929-B2-2		1.36	19975	161933			3.9976		4323	2022-09-29	20:47:29	1:E,5	0.123
88	bedaq-20220929-B2-3		1.36	52639	162070			10.7467		3354	2022-09-29	20:50:02	1:E,6	0.325
89	bedaq-20220929-B2-4		1.36	77632	163095			15.8126		16334	2022-09-29	20:52:36	1:E,7	0.476
90	bedaq-20220929-B2-5		1.36	96084	147435			21.6997		11552	2022-09-29	20:55:04	1:E,8	0.652
91	bedaq-20220929-B2-6		1.36	146505	164227			29.7537		43403	2022-09-29	20:57:39	1:F,1	0.892
92	bedaq-20220929-B2-7		1.36	196160	164708			39.767		38620	2022-09-29	21:00:12	1:F,2	1.191
93	bedaq-20220929-B2-8		1.37	203300	172053			39.454		35259	2022-09-29	21:02:46	1:F,3	1.182
94	bedaq-20220929-B2-9		1.36	179798	159826			37.5558		27257	2022-09-29	21:05:19	1:F,4	1.125
95	bedaq-20220929-B2-10		1.36	128600	166052			25.8123		18542	2022-09-29	21:07:48	1:F,5	0.774
96	bedaq-20220929-B2-11		1.36	51545	164388			10.3702		13318	2022-09-29	21:10:19	1:F,6	0.314
97	bedaq-20220929-B3-1		1.36	4258	167848			0.71458		1073	2022-09-29	21:12:49	1:F,7	0.025
98	bedaq-20220929-B3-2		1.36	16221	175056			2.96925		3974	2022-09-29	21:15:21	2:A,1	0.093
99	bedaq-20220929-B3-3		1.37	73920	180357			13.5966		5987	2022-09-29	21:17:53	2:A,2	0.41
100	bedaq-20220929-B3-4		1.36	93647	173934			17.9036		13621	2022-09-29	21:20:26	2:A,3	0.538
101	bedaq-20220929-B3-5		1.36	165267	179680			30.6817		22442	2022-09-29	21:23:00	2:A,4	0.92
102	bedaq-20220929-B3-6		1.36	254954	172589			49.3586		49751	2022-09-29	21:25:33	2:A,5	1.477
103	bedaq-20220929-B3-7		1.36	240679	165374			48.6257		30558	2022-09-29	21:28:08	2:A,6	1.455
104	bedaq-20220929-B3-8		1.36	299674	166991			59.9904		44750	2022-09-29	21:30:42	2:A,7	1.795
105	bedaq-20220929-B3-9		1.36	236429	173380			45.5528		58057	2022-09-29	21:33:10	2:A,8	1.364
106	bedaq-20220929-B3-10		1.36	157229	166638			31.4774		32270	2022-09-29	21:35:42	2:B,1	0.944
107	bedaq-20220929-B3-11		1.36	68309	175470			12.9076		24406	2022-09-29	21:38:15	2:B,2	0.389
108	bedaq-20220929-B4-1		1.36	3404	168591			0.54121		908	2022-09-29	21:40:49	2:B,3	0.02
109	bedaq-20220929-B4-2		1.36	11405	183223			1.95021		1992	2022-09-29	21:43:16	2:B,4	0.062
110	bedaq-20220929-B4-3		1.36	32311	180619			5.85825		7900	2022-09-29	21:45:51	2:B,5	0.179
111	bedaq-20220929-B4-4		1.36	61974	191736			10.6942		13227	2022-09-29	21:48:24	2:B,6	0.323
112	bedaq-20220929-B4-5		1.37	61882	176764			11.5939		10809	2022-09-29	21:50:57	2:B,7	0.35
113	bedaq-20220929-B4-6		1.36	93467	177121			17.545		21831	2022-09-29	21:53:27	2:B,8	0.528
114	bedaq-20220929-B4-7		1.36	94238	161504			19.4148		31430	2022-09-29	21:55:57	2:C,1	0.584
115	bedaq-20220929-B4-8		1.36	99742	184087			18.0181		19985	2022-09-29	21:58:30	2:C,2	0.542
116	bedaq-20220929-B4-9		1.36	104323	184600			18.7991		19824	2022-09-29	22:00:58	2:C,3	0.565
117	bedaq-20220929-B4-10		1.36	62218	176755			11.6582		12368	2022-09-29	22:03:35	2:C,4	0.352
118	bedaq-20220929-B4-11		1.36	25190	180261			4.54665		5437	2022-09-29	22:06:10	2:C,5	0.14
119	bedaq-20220929-B5-1		1.36	8880	188412			1.44372		1349	2022-09-29	22:08:44	2:C,6	0.047
120	bedaq-20220929-B5-2		1.36	23541	181714			4.2051		4374	2022-09-29	22:11:17	2:C,7	0.13
121	bedaq-20220929-B5-3		1.36	72269	191682			12.4966		13510	2022-09-29	22:13:45	2:C,8	0.377
122	bedaq-20220929-B5-4		1.36	90827	182700			16.521		22588	2022-09-29	22:16:20	2:D,1	0.497
123	bedaq-20220929-B5-5		1.36	114449	184760			20.619		23265	2022-09-29	22:18:48	2:D,2	0.619
124	bedaq-20220929-B5-6		1.36	153207	184926			27.6224		15116	2022-09-29	22:21:20	2:D,3	0.828
125	bedaq-20220929-B5-7		1.36	155869	170897			30.423		34383	2022-09-29	22:23:53	2:D,4	0.912
126	bedaq-20220929-B5-8		1.36	155517	179911			28.8263		25794	2022-09-29	22:26:21	2:D,5	0.864
127	bedaq-20220929-B5-9		1.36	142322	179518			26.4271		36155	2022-09-29	22:28:53	2:D,6	0.793
128	bedaq-20220929-B5-10		1.36	96935	180645			17.8434		17125	2022-09-29	22:31:26	2:D,7	0.537
129	bedaq-20220929-B5-11		1.36	27328	161116			5.54762		7581	2022-09-29	22:33:54	2:D,8	0.17
130	bedaq-20220929-B6-1		1.36	4474	201117			0.60996		590	2022-09-29	22:36:25	2:E,1	0.022
131	bedaq-20220929-B6-2		1.36	17583	203832			2.7548		4733	2022-09-29	22:38:59	2:E,2	0.086
132	bedaq-20220929-B6-3		1.36	55807	179182			10.2998		11098	2022-09-29	22:41:26	2:E,3	0.311
133	bedaq-20220929-B6-4		1.36	103563	194383			17.7151		19675	2022-09-29	22:43:58	2:E,4	0.533
134	bedaq-20220929-B6-5		1.36	154181	178375			28.8248		32654	2022-09-29	22:46:31	2:E,5	0.864
135	bedaq-20220929-B6-6		1.36	304049	181105			56.1141		40511	2022-09-29	22:49:00	2:E,6	1.679
136	bedaq-20220929-B6-7		1.36	285910	173034			55.2252		32997	2022-09-29	22:51:32	2:E,7	1.652
137	bedaq-20220929-B6-8		1.37	374860	173970			72.058		46584	2022-09-29	22:54:00	2:E,8	2.155
138	bedaq-20220929-B6-9		1.36	338372	172875			65.4437		68756	2022-09-29	22:56:32	2:F,1	1.957
139	bedaq-20220929-B6-10		1.36	261346	184277			47.3815		56963	2022-09-29	22:59:05	2:F,2	1.418
140	bedaq-20220929-B6-11		1.36	125079	185750			22.4258		22443	2022-09-29	23:01:33	2:F,3	0.673
141	bedaq-20220929-C1-1		1.36	1705	176303			0.18876		346	2022-09-29	23:04:05	2:F,4	0.01
142	bedaq-20220929-C1-2		1.36	8701	178765			1.49549		915	2022-09-29	23:06:38	2:F,5	0.049
143	bedaq-20220929-C1-3		1.37	23368	219314			3.43454		6497	2022-09-29	23:09:06	2:F,6	0.107
144	bedaq-20220929-C1-4		1.36	49727	184403			8.89973		9248	2022-09-29	23:11:38	2:F,7	0.27
145	bedaq-20220929-C1-5		1.37	57709	195502			9.75457		10906	2022-09-29	23:14:07	2:F,8	0.295
146	bedaq-20220929-C1-6		1.36	281367	181570			51.7845		48997	2022-09-29	23:16:42	1:A,1	1.55
147	bedaq-20220929-C1-7		1.36	335949	184575			60.8469		41010	2022-09-29	23:19:17	1:A,2	1.82
148	bedaq-20220929-C1-8		1.36	311179	199945			52.0084		50672	2022-09-29	23:21:50	1:A,3	1.556
149	bedaq-20220929-C1-9		1.36	228086	189514			40.1884		25983	2022-09-29	23:24:18	1:A,4	1.204
150	bedaq-20220929-C1-10		1.36	331847	192631			57.5832		24360	2022-09-29	23:26:50	1:A,5	1.723
151	bedaq-20220929-C1-11		1.36	143739	201426			23.7737		19114	2022-09-29	23:29:23	1:A,6	0.714
152	bedaq-20220929-C2-1		1.36	807	187984			0.00851		165	2022-09-29	23:31:57	1:A,7	0.004
153	bedaq-20220929-C2-2		1.36	6366	189655			0.98927		932	2022-09-29	23:34:31	1:A,8	0.034
154	bedaq-20220929-C2-3		1.36	29923	197490			4.94119		7278	2022-09-29	23:36:59	1:B,1	0.152
155	bedaq-20220929-C2-4		1.36	94684	183900			17.1151		20182	2022-09-29	23:39:29	1:B,2	0.515
156	bedaq-20220929-C2-5		1.37	162321	206587			26.1901		21610	2022-09-29	23:42:03	1:B,3	0.786
157	bedaq-20220929-C2-6		1.36	334536	179791			62.2063		63689	2022-09-29	23:44:37	1:B,4	1.861
158	bedaq-20220929-C2-7		1.36	359334	187139			64.1982		47668	2022-09-29	23:47:10	1:B,5	1.92
159	bedaq-20220929-C2-8		1.36	368988	184997			66.6916		43806	2022-09-29	23:49:44	1:B,6	1.995
160	bedaq-20220929-C2-9		1.36	308790	184088			56.0653		46410	2022-09-29	23:52:17	1:B,7	1.677
161	bedaq-20220929-C2-10		1.36	204733	183362			37.2743		37635	2022-09-29	23:54:51	1:B,8	1.117
162	bedaq-20220929-C2-11		1.36	108013	182343			19.7114		16196	2022-09-29	23:57:19	1:C,1	0.592
163	bedaq-20220929-C3-1		1.36	2145	198316			0.22708		489	2022-09-29	23:59:51	1:C,2	0.011
164	bedaq-20220929-C3-2		1.36	9150	189723			1.48048		1969	2022-09-30	00:02:24	1:C,3	0.048
165	bedaq-20220929-C3-3		1.36	27111	193423			4.56073		3945	2022-09-30	00:04:58	1:C,4	0.14
166	bedaq-20220929-C3-4		1.36	51087	193844			8.69463		7409	2022-09-30	00:07:32	1:C,5	0.264
167	bedaq-20220929-C3-5		1.36	100293	192408			17.3289		23470	2022-09-30	00:10:06	1:C,6	0.521
168	bedaq-20220929-C3-6		1.36	106123	200338			17.6127		13344	2022-09-30	00:12:40	1:C,7	0.53
169	bedaq-20220929-C3-7		1.36	111583	181492			20.4635		21770	2022-09-30	00:15:13	1:C,8	0.615
170	bedaq-20220929-C3-8		1.36	80838	209909			12.7676		19820	2022-09-30	00:17:47	1:D,1	0.385
171	bedaq-20220929-C3-9		1.36	110638	195481			18.8275		18029	2022-09-30	00:20:20	1:D,2	0.566
172	bedaq-20220929-C3-10		1.36	55498	218597			8.37082		16198	2022-09-30	00:22:54	1:D,3	0.254
173	bedaq-20220929-C3-11		1.36	25624	190486			4.37163		6007	2022-09-30	00:25:22	1:D,4	0.135
174	bedaq-20220929-C4-1		1.36	548	186077					80	2022-09-30	00:27:53	1:D,5	0.003
175	bedaq-20220929-C4-2		1.36	4753	202821			0.64989		1043	2022-09-30	00:30:26	1:D,6	0.023
176	bedaq-20220929-C4-3		1.36	28649	183703			5.08985		6323	2022-09-30	00:33:00	1:D,7	0.156
177	bedaq-20220929-C4-4		1.36	123433	188327			21.8242		30293	2022-09-30	00:35:29	1:D,8	0.655
178	bedaq-20220929-C4-5		1.36	199751	188830			35.307		28759	2022-09-30	00:37:59	1:E,1	1.058
179	bedaq-20220929-C4-6		1.36	546743	181290			100.909		161951	2022-09-30	00:40:32	1:E,2	3.016
180	bedaq-20220929-C4-7		1.36	645588	186367			115.926		71686	2022-09-30	00:43:06	1:E,3	3.464
181	bedaq-20220929-C4-8		1.36	543197	191654			94.8251		114101	2022-09-30	00:45:39	1:E,4	2.834
182	bedaq-20220929-C4-9		1.36	513665	190001			90.4437		74838	2022-09-30	00:48:13	1:E,5	2.703
183	bedaq-20220929-C4-10		1.37	422535	194038			72.8236		41837	2022-09-30	00:50:46	1:E,6	2.178
184	bedaq-20220929-C4-11		1.36	205672	192485			35.6645		28795	2022-09-30	00:53:20	1:E,7	1.069
185	bedaq-20220929-C5-1		1.36	1918	209765			0.17102		273	2022-09-30	00:55:49	1:E,8	0.009
186	bedaq-20220929-C5-2		1.36	7061	191141			1.10237		2129	2022-09-30	00:58:19	1:F,1	0.037
187	bedaq-20220929-C5-3		1.36	23726	191340			4.01917		5539	2022-09-30	01:00:48	1:F,2	0.124
188	bedaq-20220929-C5-4		1.36	71219	199313			11.8366		7801	2022-09-30	01:03:18	1:F,3	0.357
189	bedaq-20220929-C5-5		1.36	107867	199111			18.0155		13068	2022-09-30	01:05:52	1:F,4	0.542
190	bedaq-20220929-C5-6		1.36	268686	206499			43.4591		24620	2022-09-30	01:08:25	1:F,5	1.301
191	bedaq-20220929-C5-7		1.36	241946	190303			42.4614		36020	2022-09-30	01:10:58	1:F,6	1.271
192	bedaq-20220929-C5-8		1.36	308973	195747			52.7493		31386	2022-09-30	01:13:27	1:F,7	1.578
193	bedaq-20220929-C5-9		1.36	241248	189823			42.446		43045	2022-09-30	01:15:57	2:A,1	1.271
194	bedaq-20220929-C5-10		1.36	181079	203070			29.7409		26863	2022-09-30	01:18:26	2:A,2	0.892
195	bedaq-20220929-C5-11		1.36	106480	217333			16.2798		17710	2022-09-30	01:20:57	2:A,3	0.49
196	bedaq-20220929-C6-1		1.36	2165	189232			0.248		715	2022-09-30	01:23:30	2:A,4	0.011
197	bedaq-20220929-C6-2		1.36	10933	184076			1.85458		1846	2022-09-30	01:26:04	2:A,5	0.059
198	bedaq-20220929-C6-3		1.36	67843	200554			11.1985		14634	2022-09-30	01:28:38	2:A,6	0.338
199	bedaq-20220929-C6-4		1.36	121958	199171			20.3804		26644	2022-09-30	01:31:11	2:A,7	0.612
200	bedaq-20220929-C6-5		1.36	188355	193253			32.5199		75425	2022-09-30	01:33:45	2:A,8	0.975
201	bedaq-20220929-C6-6		1.36	352132	186743			63.0426		77300	2022-09-30	01:36:20	2:B,1	1.886
202	bedaq-20220929-C6-7		1.36	396517	189642			69.9185		80957	2022-09-30	01:38:48	2:B,2	2.091
203	bedaq-20220929-C6-8		1.36	353252	185717			63.5934		81584	2022-09-30	01:41:19	2:B,3	1.902
204	bedaq-20220929-C6-9		1.36	381766	193695			65.9009		55694	2022-09-30	01:43:53	2:B,4	1.971
205	bedaq-20220929-C6-10		1.36	302669	195655			51.6946		57124	2022-09-30	01:46:26	2:B,5	1.547
206	bedaq-20220929-C6-11		1.36	140474	185434			25.2458		25847	2022-09-30	01:48:54	2:B,6	0.758
207	bedaq-20220929-C6-12				1.16						2022-09-30	01:51:25	1:F,8
208	bedaq-20220929-D1-1		1.34	3187	214803			0.3618		718	2022-09-30	07:57:24	2:A,1	0.015
209	bedaq-20220929-D1-2		1.34	18625	178434			3.36194		3612	2022-09-30	07:59:56	2:A,2	0.104
210	bedaq-20220929-D1-3		1.34	49051	191730			8.4363		8003	2022-09-30	08:02:29	2:A,3	0.256
211	bedaq-20220929-D1-4		1.34	65242	175056			12.3515		6123	2022-09-30	08:05:03	2:A,4	0.373
212	bedaq-20220929-D1-5		1.34	112164	185345			20.1404		11943	2022-09-30	08:07:36	2:A,5	0.605
213	bedaq-20220929-D1-6		1.34	201632	190108			35.4001		34575	2022-09-30	08:10:10	2:A,6	1.061
214	bedaq-20220929-D1-7		1.34	191360	200243			31.8828		35370	2022-09-30	08:12:43	2:A,7	0.956
215	bedaq-20220929-D1-8		1.35	188985	192522			32.7536		33653	2022-09-30	08:15:12	2:A,8	0.982
216	bedaq-20220929-D1-9		1.35	153754	178873			28.6643		18324	2022-09-30	08:17:43	2:B,1	0.86
217	bedaq-20220929-D1-10		1.35	115684	182736			21.0753		13622	2022-09-30	08:20:16	2:B,2	0.633
218	bedaq-20220929-D1-11		1.35	40648	187237			7.13827		8981	2022-09-30	08:22:50	2:B,3	0.217
219	bedaq-20220929-D2-1		1.35	5861	188772			0.90486		1364	2022-09-30	08:25:18	2:B,4	0.031
220	bedaq-20220929-D2-2		1.35	31197	199210			5.11157		7700	2022-09-30	08:27:50	2:B,5	0.157
221	bedaq-20220929-D2-3		1.35	77995	185764			13.9319		11951	2022-09-30	08:30:23	2:B,6	0.42
222	bedaq-20220929-D2-4		1.35	141410	184399			25.5583		20043	2022-09-30	08:32:57	2:B,7	0.767
223	bedaq-20220929-D2-5		1.35	166988	181420			30.7038		22675	2022-09-30	08:35:30	2:B,8	0.92
224	bedaq-20220929-D2-6		1.35	260661	239452			36.3367		68638	2022-09-30	08:37:58	2:C,1	1.089
225	bedaq-20220929-D2-7		1.35	271790	189081			48.0248		45050	2022-09-30	08:40:30	2:C,2	1.437
226	bedaq-20220929-D2-8		1.35	273118	187302			48.72		28310	2022-09-30	08:43:03	2:C,3	1.458
227	bedaq-20220929-D2-9		1.35	267192	190966			46.7428		41304	2022-09-30	08:45:32	2:C,4	1.399
228	bedaq-20220929-D2-10		1.35	143519	176535			27.1031		31319	2022-09-30	08:48:02	2:C,5	0.813
229	bedaq-20220929-D2-11		1.34	83311	193230			14.3101		16939	2022-09-30	08:50:31	2:C,6	0.431
230	bedaq-20220929-D3-1		1.35	2727	188544			0.34927		505	2022-09-30	08:53:03	2:C,7	0.014
231	bedaq-20220929-D3-2		1.35	14323	186334			2.44001		4447	2022-09-30	08:55:36	2:C,8	0.077
232	bedaq-20220929-D3-3		1.35	63064	211082			9.87462		16730	2022-09-30	08:58:10	2:D,1	0.299
233	bedaq-20220929-D3-4		1.35	101190	181658			18.5279		23055	2022-09-30	09:00:43	2:D,2	0.557
234	bedaq-20220929-D3-5		1.35	135896	170149			26.6244		26391	2022-09-30	09:03:10	2:D,3	0.799
235	bedaq-20220929-D3-6		1.35	211162	176915			39.8548		44751	2022-09-30	09:05:43	2:D,4	1.194
236	bedaq-20220929-D3-7		1.35	226748	183912			41.173		33315	2022-09-30	09:08:10	2:D,5	1.233
237	bedaq-20220929-D3-8		1.35	239904	179157			44.7296		55155	2022-09-30	09:10:45	2:D,6	1.339
238	bedaq-20220929-D3-9		1.35	230879	180196			42.793		29347	2022-09-30	09:13:19	2:D,7	1.281
239	bedaq-20220929-D3-10		1.35	176453	177422			33.1863		21176	2022-09-30	09:15:52	2:D,8	0.995
240	bedaq-20220929-D3-11		1.35	111274	178833			20.712		21731	2022-09-30	09:18:20	2:E,1	0.622
241	bedaq-20220929-D4-1		1.35	2095	190421			0.2333		453	2022-09-30	09:20:55	2:E,2	0.011
242	bedaq-20220929-D4-2		1.35	7635	177996			1.30179		2027	2022-09-30	09:23:23	2:E,3	0.043
243	bedaq-20220929-D4-3		1.35	21459	181960			3.81594		4031	2022-09-30	09:25:54	2:E,4	0.118
244	bedaq-20220929-D4-4		1.35	31690	183586			5.64817		8404	2022-09-30	09:28:28	2:E,5	0.173
245	bedaq-20220929-D4-5		1.35	43191	186933			7.60588		8893	2022-09-30	09:30:56	2:E,6	0.231
246	bedaq-20220929-D4-6		1.35	74390	184392			13.3816		20570	2022-09-30	09:33:27	2:E,7	0.403
247	bedaq-20220929-D4-7		1.35	75031	181689			13.7008		12007	2022-09-30	09:35:56	2:E,8	0.413
248	bedaq-20220929-D4-8		1.35	68083	184908			12.2011		23005	2022-09-30	09:38:27	2:F,1	0.368
249	bedaq-20220929-D4-9		1.35	70517	182225			12.8303		20767	2022-09-30	09:40:54	2:F,2	0.387
250	bedaq-20220929-D4-10		1.35	48484	197244			8.10027		10552	2022-09-30	09:43:26	2:F,3	0.246
251	bedaq-20220929-D4-11		1.35	24072	179478			4.35841		7410	2022-09-30	09:45:54	2:F,4	0.134
252	bedaq-20220929-D5-1		1.35	3954	186663			0.5743		1304	2022-09-30	09:48:27	2:F,5	0.021
253	bedaq-20220929-D5-2		1.35	13765	218151			1.97871		4233	2022-09-30	09:50:55	2:F,6	0.063
254	bedaq-20220929-D5-3		1.35	63227	190741			10.9708		14455	2022-09-30	09:53:27	2:F,7	0.331
255	bedaq-20220929-D5-4		1.35	70411	181742			12.8452		17548	2022-09-30	09:55:55	2:F,8	0.387
256	bedaq-20220929-D5-5		1.35	95748	169392			18.803		19858	2022-09-30	09:58:27	1:A,1	0.565
257	bedaq-20220929-D5-6		1.35	157363	179612			29.2189		43158	2022-09-30	10:00:56	1:A,2	0.876
258	bedaq-20220929-D5-7		1.35	188935	171629			36.7476		62696	2022-09-30	10:03:27	1:A,3	1.101
259	bedaq-20220929-D5-8		1.35	299545	250905			39.8642		57874	2022-09-30	10:06:01	1:A,4	1.194
260	bedaq-20220929-D5-9		1.35	179407	173869			34.4364		53200	2022-09-30	10:08:34	1:A,5	1.032
261	bedaq-20220929-D5-10		1.35	183088	173774			35.1649		45486	2022-09-30	10:11:08	1:A,6	1.054
262	bedaq-20220929-D5-11		1.35	142815	192862			24.675		17628	2022-09-30	10:13:42	1:A,7	0.741
263	bedaq-20220929-D6-1		1.35	2428	176985			0.32425		604	2022-09-30	10:16:11	1:A,8	0.014
264	bedaq-20220929-D6-2		1.35	2781	178622			0.38628		619	2022-09-30	10:18:42	1:B,1	0.016
265	bedaq-20220929-D6-3		1.36	7698	198574			1.16344		2312	2022-09-30	10:21:16	1:B,2	0.039
266	bedaq-20220929-D6-4		1.35	12574	187025			2.11718		3016	2022-09-30	10:23:49	1:B,3	0.067
267	bedaq-20220929-D6-5		1.35	20318	179049			3.66673		2807	2022-09-30	10:26:18	1:B,4	0.113
268	bedaq-20220929-D6-6		1.35	45081	181222			8.19936		10302	2022-09-30	10:28:50	1:B,5	0.249
269	bedaq-20220929-D6-7		1.35	52639	176545			9.85454		14735	2022-09-30	10:31:23	1:B,6	0.298
270	bedaq-20220929-D6-8		1.35	41412	171439			7.95781		9473	2022-09-30	10:33:52	1:B,7	0.242
271	bedaq-20220929-D6-9		1.35	32148	181391			5.80263		4817	2022-09-30	10:36:22	1:B,8	0.177
272	bedaq-20220929-D6-10		1.35	43704	179828			8.00735		10576	2022-09-30	10:38:56	1:C,1	0.243
273	bedaq-20220929-D6-11		1.35	25796	211499			3.95113		4592	2022-09-30	10:41:24	1:C,2	0.122

## Sheet: drug
Compound 2: Bedaquiline
	Name	Sample Text	RT	Area	IS Area	Type	Std. Conc	Conc.
1	bedaq-20220929-S1		1.36	499	131802	Standard	0.1
2	bedaq-20220929-S2		1.36	1172	130057	Standard	1	2.1279
3	bedaq-20220929-S3		1.36	4194	132423	Standard	10	11.542
4	bedaq-20220929-S4		1.36	17791	132892	Standard	50	54.0067
5	bedaq-20220929-S5		1.36	36837	134558	Standard	100	112.126
6	bedaq-20220929-S6		1.36	165044	141985	Standard	500	481.342
7	bedaq-20220929-Meoh-3
8	bedaq-20220929-Meoh-4		1.36	333	665.954			206.331
9	bedaq-20220929-A1-1		1.36	58570	152099			158.375
10	bedaq-20220929-A1-2		1.36	130826	149682			361.526
11	bedaq-20220929-A1-3		1.36	279407	150400			770.248
12	bedaq-20220929-A1-4		1.36	209256	147971			585.946
13	bedaq-20220929-A1-5		1.36	158159	143202			457.261
14	bedaq-20220929-A1-6		1.36	142138	151381			388.498
15	bedaq-20220929-A1-7		1.36	81854	139949			241.392
16	bedaq-20220929-A1-8		1.36	60646	143979			173.391
17	bedaq-20220929-A1-9		1.36	59567	144426			169.745
18	bedaq-20220929-A1-10		1.36	20809	144882			58.0581
19	bedaq-20220929-A1-11		1.36	7630	145958			20.102
20	bedaq-20220929-A2-1		1.36	19918	150428			53.3968
21	bedaq-20220929-A2-2		1.36	62200	150491			170.108
22	bedaq-20220929-A2-3		1.36	119551	148776			332.25
23	bedaq-20220929-A2-4		1.36	116160	148120			324.217
24	bedaq-20220929-A2-5		1.36	94307	147683			263.7
25	bedaq-20220929-A2-6		1.36	53446	145217			151.299
26	bedaq-20220929-A2-7		1.36	38124	154156			101.135
27	bedaq-20220929-A2-8		1.36	29612	150486			80.1391
28	bedaq-20220929-A2-9		1.36	21753	144715			60.8356
29	bedaq-20220929-A2-10		1.36	25608	142832			72.8748
30	bedaq-20220929-A2-11		1.36	3803	135482			10.0454
31	bedaq-20220929-A3-1		1.36	122643	145582			348.4
32	bedaq-20220929-A3-2		1.36	378135	149386			1050.08
33	bedaq-20220929-A3-3		1.36	432210	144461			1241.46
34	bedaq-20220929-A3-4		1.36	206219	142589			599.275
35	bedaq-20220929-A3-5		1.36	211318	150049			583.521
36	bedaq-20220929-A3-6		1.36	151194	149936			417.351
37	bedaq-20220929-A3-7		1.36	105345	146253			297.652
38	bedaq-20220929-A3-8		1.36	44874	167815			109.484
39	bedaq-20220929-A3-9		1.36	70603	145873			199.478
40	bedaq-20220929-A3-10		1.36	23378	141232			67.1555
41	bedaq-20220929-A3-11		1.36	10821	147291			28.9055
42	bedaq-20220929-A4-1		1.36	64786	148452			179.703
43	bedaq-20220929-A4-2		1.36	185921	151981			506.651
44	bedaq-20220929-A4-3		1.36	138681	150915			380.183
45	bedaq-20220929-A4-4		1.36	95274	147386			266.961
46	bedaq-20220929-A4-5		1.36	74777	157044			196.217
47	bedaq-20220929-A4-6		1.36	62373	150141			170.988
48	bedaq-20220929-A4-7		1.36	52268	144246			148.934
49	bedaq-20220929-A4-8		1.36	46070	147894			127.809
50	bedaq-20220929-A4-9		1.36	31918	145350			89.6193
51	bedaq-20220929-A4-10		1.36	12407	145196			33.8863
52	bedaq-20220929-A4-11		1.36	4246	153486			9.87486
53	bedaq-20220929-A5-1		1.36	16256	157875			41.1633
54	bedaq-20220929-A5-2		1.36	35917	152656			96.1367
55	bedaq-20220929-A5-3		1.36	64555	153544			173.065
56	bedaq-20220929-A5-4		1.36	34455	156511			89.8495
57	bedaq-20220929-A5-5		1.36	36058	151303			97.3997
58	bedaq-20220929-A5-6		1.36	25022	145585			69.7912
59	bedaq-20220929-A5-7		1.36	16891	150250			45.0905
60	bedaq-20220929-A5-8		1.36	12976	150296			34.2529
61	bedaq-20220929-A5-9		1.36	9883	144736			26.7537
62	bedaq-20220929-A5-10		1.36	4049	148338			9.72451
63	bedaq-20220929-A5-11		1.36	1983	153205			3.76023
64	bedaq-20220929-A6-1		1.36	40226	154985			106.221
65	bedaq-20220929-A6-2		1.36	88314	158213			230.304
66	bedaq-20220929-A6-3		1.36	525286	156810			1390.18
67	bedaq-20220929-A6-4		1.37	356304	155683			949.283
68	bedaq-20220929-A6-5		1.36	283326	154335			761.12
69	bedaq-20220929-A6-6		1.36	237445	151191			650.9
70	bedaq-20220929-A6-7		1.36	118063	159968			305.026
71	bedaq-20220929-A6-8		1.36	77761	152980			209.575
72	bedaq-20220929-A6-9		1.37	51144	161598			129.877
73	bedaq-20220929-A6-10		1.36	17104	156513			43.7879
74	bedaq-20220929-A6-11		1.36	8373	159865			20.1439
75	bedaq-20220929-B1-1		1.36	131739	150989			360.894
76	bedaq-20220929-B1-2		1.36	155271	154137			416.923
77	bedaq-20220929-B1-3		1.36	158674	163041			402.736
78	bedaq-20220929-B1-4		1.36	79935	167369			196.816
79	bedaq-20220929-B1-5		1.36	84167	165629			209.519
80	bedaq-20220929-B1-6		1.37	59503	154330			158.574
81	bedaq-20220929-B1-7		1.36	36170	149860			98.6625
82	bedaq-20220929-B1-8		1.36	29280	143094			83.4001
83	bedaq-20220929-B1-9		1.36	23502	155262			61.2748
84	bedaq-20220929-B1-10		1.36	12424	182983			26.5933
85	bedaq-20220929-B1-11		1.36	4552	166245			9.75923
86	bedaq-20220929-B2-1		1.36	142517	167960			350.929
87	bedaq-20220929-B2-2		1.36	387225	161933			991.913
88	bedaq-20220929-B2-3		1.37	199968	162070			511.024
89	bedaq-20220929-B2-4		1.36	144468	163095			366.415
90	bedaq-20220929-B2-5		1.36	130667	147435			366.612
91	bedaq-20220929-B2-6		1.37	119263	164227			300.109
92	bedaq-20220929-B2-7		1.36	96059	164708			240.696
93	bedaq-20220929-B2-8		1.37	78033	172053			186.82
94	bedaq-20220929-B2-9		1.37	56666	159826			145.692
95	bedaq-20220929-B2-10		1.36	20827	166052			50.4953
96	bedaq-20220929-B2-11		1.37	7485	164388			17.301
97	bedaq-20220929-B3-1		1.36	163625	167848			403.411
98	bedaq-20220929-B3-2		1.36	419246	175056			993.437
99	bedaq-20220929-B3-3		1.37	283916	180357			652.433
100	bedaq-20220929-B3-4		1.36	181359	173934			431.603
101	bedaq-20220929-B3-5		1.36	173311	179680			399.139
102	bedaq-20220929-B3-6		1.36	129187	172589			309.382
103	bedaq-20220929-B3-7		1.36	71029	165374			176.835
104	bedaq-20220929-B3-8		1.36	70355	166991			173.43
105	bedaq-20220929-B3-9		1.36	46885	173380			110.735
106	bedaq-20220929-B3-10		1.36	16470	166638			39.4464
107	bedaq-20220929-B3-11		1.37	5617	175470			11.6829
108	bedaq-20220929-B4-1		1.36	69290	168591			169.144
109	bedaq-20220929-B4-2		1.37	81575	183223			183.366
110	bedaq-20220929-B4-3		1.36	87234	180619			199.05
111	bedaq-20220929-B4-4		1.37	71252	191736			152.783
112	bedaq-20220929-B4-5		1.37	52667	176764			122.175
113	bedaq-20220929-B4-6		1.36	34870	177121			80.1792
114	bedaq-20220929-B4-7		1.36	24576	161504			61.6075
115	bedaq-20220929-B4-8		1.37	17501	184087			37.8831
116	bedaq-20220929-B4-9		1.36	16372	184600			35.2323
117	bedaq-20220929-B4-10		1.36	6476	176755			13.6045
118	bedaq-20220929-B4-11		1.36	2670	180261			4.5362
119	bedaq-20220929-B5-1		1.36	320948	188412			706.132
120	bedaq-20220929-B5-2		1.37	370305	181714			845.074
121	bedaq-20220929-B5-3		1.37	201074	191682			434.224
122	bedaq-20220929-B5-4		1.36	127985	182700			289.437
123	bedaq-20220929-B5-5		1.36	106075	184760			236.921
124	bedaq-20220929-B5-6		1.36	65657	184926			145.897
125	bedaq-20220929-B5-7		1.37	52992	170897			127.216
126	bedaq-20220929-B5-8		1.36	39775	179911			90.2389
127	bedaq-20220929-B5-9		1.36	36210	179518			82.1883
128	bedaq-20220929-B5-10		1.36	14676	180645			32.136
129	bedaq-20220929-B5-11		1.36	3694	161116			7.90819
130	bedaq-20220929-B6-1		1.36	241454	201117			497.198
131	bedaq-20220929-B6-2		1.36	313827	203832			638.075
132	bedaq-20220929-B6-3		1.36	369625	179182			855.461
133	bedaq-20220929-B6-4		1.36	448632	194383			957.308
134	bedaq-20220929-B6-5		1.37	475266	178375			1105.41
135	bedaq-20220929-B6-6		1.36	302896	181105			693.276
136	bedaq-20220929-B6-7		1.36	173441	173034			414.844
137	bedaq-20220929-B6-8		1.37	155091	173970			368.777
138	bedaq-20220929-B6-9		1.36	120303	172875			287.516
139	bedaq-20220929-B6-10		1.36	47791	184277			106.135
140	bedaq-20220929-B6-11		1.37	18887	185750			40.6295
141	bedaq-20220929-C1-1		1.36	39867	176303			92.3339
142	bedaq-20220929-C1-2		1.37	110663	178765			255.584
143	bedaq-20220929-C1-3		1.38	210786	219314			397.709
144	bedaq-20220929-C1-4		1.36	166402	184403			373.307
145	bedaq-20220929-C1-5		1.37	48175	195502			100.765
146	bedaq-20220929-C1-6		1.36	698930	181570			1597.73
147	bedaq-20220929-C1-7		1.36	399886	184575			898.538
148	bedaq-20220929-C1-8		1.36	231608	199945			479.66
149	bedaq-20220929-C1-9		1.36	140446	189514			306.291
150	bedaq-20220929-C1-10		1.36	42919	192631			90.9546
151	bedaq-20220929-C1-11		1.37	19856	201426			39.3387
152	bedaq-20220929-C2-1		1.36	41413	187984			89.9143
153	bedaq-20220929-C2-2		1.37	215912	189655			471.388
154	bedaq-20220929-C2-3		1.36	424112	197490			890.637
155	bedaq-20220929-C2-4		1.36	527291	183900			1189.69
156	bedaq-20220929-C2-5		1.37	396153	206587			795.116
157	bedaq-20220929-C2-6		1.36	260031	179791			599.294
158	bedaq-20220929-C2-7		1.36	155437	187139			343.483
159	bedaq-20220929-C2-8		1.37	139073	184997			310.726
160	bedaq-20220929-C2-9		1.36	87583	184088			196.055
161	bedaq-20220929-C2-10		1.36	22852	183362			50.1634
162	bedaq-20220929-C2-11		1.36	12002	182343			25.7308
163	bedaq-20220929-C3-1		1.36	30926	198316			63.1739
164	bedaq-20220929-C3-2		1.36	98126	189723			213.273
165	bedaq-20220929-C3-3		1.36	70995	193423			150.883
166	bedaq-20220929-C3-4		1.36	60600	193844			128.272
167	bedaq-20220929-C3-5		1.36	197915	192408			425.757
168	bedaq-20220929-C3-6		1.36	37147	200338			75.4212
169	bedaq-20220929-C3-7		1.36	26271	181492			58.5237
170	bedaq-20220929-C3-8		1.36	12573	209909			23.2679
171	bedaq-20220929-C3-9		1.36	16541	195481			33.5388
172	bedaq-20220929-C3-10		1.36	4876	218597			7.65035
173	bedaq-20220929-C3-11		1.36	4811	190486			8.87675
174	bedaq-20220929-C4-1		1.36	24040	186077			52.06
175	bedaq-20220929-C4-2		1.36	101687	202821			206.69
176	bedaq-20220929-C4-3		1.36	372304	183703			840.428
177	bedaq-20220929-C4-4		1.36	546391	188327			1203.82
178	bedaq-20220929-C4-5		1.36	568325	188830			1248.87
179	bedaq-20220929-C4-6		1.36	837812	181290			1918.49
180	bedaq-20220929-C4-7		1.36	439676	186367			978.587
181	bedaq-20220929-C4-8		1.36	274633	191654			593.755
182	bedaq-20220929-C4-9		1.36	186621	190001			406.476
183	bedaq-20220929-C4-10		1.37	50220	194038			105.917
184	bedaq-20220929-C4-11		1.36	24918	192485			52.1683
185	bedaq-20220929-C5-1		1.36	33767	209765			65.265
186	bedaq-20220929-C5-2		1.36	71841	191141			154.543
187	bedaq-20220929-C5-3		1.36	161523	191340			349.121
188	bedaq-20220929-C5-4		1.36	172315	199313			357.588
189	bedaq-20220929-C5-5		1.36	153267	199111			318.203
190	bedaq-20220929-C5-6		1.36	561862	206499			1128.87
191	bedaq-20220929-C5-7		1.37	218285	190303			474.959
192	bedaq-20220929-C5-8		1.36	178082	195747			376.372
193	bedaq-20220929-C5-9		1.36	112366	189823			244.33
194	bedaq-20220929-C5-10		1.37	34611	203070			69.1961
195	bedaq-20220929-C5-11		1.36	19118	217333			34.9301
196	bedaq-20220929-C6-1		1.36	153357	189232			335.098
197	bedaq-20220929-C6-2		1.36	299323	184076			673.992
198	bedaq-20220929-C6-3		1.36	759995	200554			1572.85
199	bedaq-20220929-C6-4		1.37	513497	199171			1069.57
200	bedaq-20220929-C6-5		1.37	406858	193253			873.104
201	bedaq-20220929-C6-6		1.36	384058	186743			852.872
202	bedaq-20220929-C6-7		1.37	221271	189642			483.164
203	bedaq-20220929-C6-8		1.36	179913	185717			400.881
204	bedaq-20220929-C6-9		1.36	139790	193695			298.238
205	bedaq-20220929-C6-10		1.36	65787	195655			138.085
206	bedaq-20220929-C6-11		1.36	44106	185434			97.206
207	bedaq-20220929-C6-12		1.36	1	1.16			284.207
208	bedaq-20220929-D1-1		1.35	249711	214803			481.388
209	bedaq-20220929-D1-2		1.35	538744	178434			1252.85
210	bedaq-20220929-D1-3		1.35	261034	191730			564.049
211	bedaq-20220929-D1-4		1.35	162734	175056			384.619
212	bedaq-20220929-D1-5		1.35	140683	185345			313.748
213	bedaq-20220929-D1-6		1.35	156011	190108			339.345
214	bedaq-20220929-D1-7		1.35	94703	200243			194.881
215	bedaq-20220929-D1-8		1.35	82712	192522			176.885
216	bedaq-20220929-D1-9		1.35	51791	178873			118.682
217	bedaq-20220929-D1-10		1.35	16001	182736			34.763
218	bedaq-20220929-D1-11		1.35	9280	187237			18.9744
219	bedaq-20220929-D2-1		1.35	332562	188772			730.344
220	bedaq-20220929-D2-2		1.35	564703	199210			1176.16
221	bedaq-20220929-D2-3		1.35	441283	185764			985.365
222	bedaq-20220929-D2-4		1.35	367112	184399			825.551
223	bedaq-20220929-D2-5		1.35	281434	181420			642.916
224	bedaq-20220929-D2-6		1.35	234661	239452			405.552
225	bedaq-20220929-D2-7		1.35	119252	189081			260.425
226	bedaq-20220929-D2-8		1.35	86919	187302			191.191
227	bedaq-20220929-D2-9		1.35	66289	190966			142.608
228	bedaq-20220929-D2-10		1.35	14032	176535			31.4084
229	bedaq-20220929-D2-11		1.34	8989	193230			17.7114
230	bedaq-20220929-D3-1		1.35	164470	188544			360.815
231	bedaq-20220929-D3-2		1.35	382137	186334			850.465
232	bedaq-20220929-D3-3		1.35	627007	211082			1232.55
233	bedaq-20220929-D3-4		1.35	362721	181658			827.99
234	bedaq-20220929-D3-5		1.35	368094	170149			897.225
235	bedaq-20220929-D3-6		1.35	321562	176915			753.566
236	bedaq-20220929-D3-7		1.35	194123	183912			436.935
237	bedaq-20220929-D3-8		1.35	162179	179157			374.491
238	bedaq-20220929-D3-9		1.35	129144	180196			296.155
239	bedaq-20220929-D3-10		1.35	54403	177422			125.783
240	bedaq-20220929-D3-11		1.35	17786	178833			39.7051
241	bedaq-20220929-D4-1		1.35	33027	190421			70.4441
242	bedaq-20220929-D4-2		1.35	81827	177996			189.386
243	bedaq-20220929-D4-3		1.35	87935	181960			199.171
244	bedaq-20220929-D4-4		1.35	60444	183586			135.176
245	bedaq-20220929-D4-5		1.36	39903	186933			87.073
246	bedaq-20220929-D4-6		1.35	48327	184392			107.276
247	bedaq-20220929-D4-7		1.35	24698	181689			54.8615
248	bedaq-20220929-D4-8		1.35	17842	184908			38.4734
249	bedaq-20220929-D4-9		1.35	14815	182225			32.1609
250	bedaq-20220929-D4-10		1.35	5571	197244			10.1177
251	bedaq-20220929-D4-11		1.35	3426	179478			6.3132
252	bedaq-20220929-D5-1		1.35	285928	186663			634.812
253	bedaq-20220929-D5-2		1.35	442125	218151			840.439
254	bedaq-20220929-D5-3		1.35	503056	190741			1094.17
255	bedaq-20220929-D5-4		1.35	223767	181742			509.939
256	bedaq-20220929-D5-5		1.36	176736	169392			431.879
257	bedaq-20220929-D5-6		1.36	150648	179612			346.867
258	bedaq-20220929-D5-7		1.36	101001	171629			242.89
259	bedaq-20220929-D5-8		1.36	113475	250905			186.29
260	bedaq-20220929-D5-9		1.36	56882	173869			134.31
261	bedaq-20220929-D5-10		1.36	22956	173774			53.269
262	bedaq-20220929-D5-11		1.36	10181	192862			20.3155
263	bedaq-20220929-D6-1		1.36	139986	176985			327.008
264	bedaq-20220929-D6-2		1.36	20196	178622			45.3602
265	bedaq-20220929-D6-3		1.36	22295	198574			45.0313
266	bedaq-20220929-D6-4		1.36	20713	187025			44.3964
267	bedaq-20220929-D6-5		1.36	20811	179049			46.6743
268	bedaq-20220929-D6-6		1.36	43130	181222			97.2657
269	bedaq-20220929-D6-7		1.36	20515	176545			46.6637
270	bedaq-20220929-D6-8		1.36	15359	171439			35.6045
271	bedaq-20220929-D6-9		1.36	9247	181391			19.5638
272	bedaq-20220929-D6-10		1.36	6265	179828			12.8566
273	bedaq-20220929-D6-11		1.36	2993	211499			4.26296

## Sheet: metabolite
Compound 3: M2
	Name	Sample Text	RT	Area	IS Area	Type	Std. Conc	Conc.
1	bedaq-20220929-S1		1.36	702	131802	Standard	0.1	0.04306
2	bedaq-20220929-S2		1.36	5481	130057	Standard	1	1.2766
3	bedaq-20220929-S3		1.36	44908	132423	Standard	10	11.2268
4	bedaq-20220929-S4		1.35	211305	132892	Standard	50	53.1384
5	bedaq-20220929-S5		1.35	460631	134558	Standard	100	114.56
6	bedaq-20220929-S6		1.36	2038335	141985	Standard	500	480.855
7	bedaq-20220929-Meoh-3
8	bedaq-20220929-Meoh-4		1.35	4048	665.954			203.534
9	bedaq-20220929-A1-1		1.36	1738	152099			0.2475
10	bedaq-20220929-A1-2		1.36	6023	149682			1.21288
11	bedaq-20220929-A1-3		1.35	45458	150400			9.99123
12	bedaq-20220929-A1-4		1.36	108819	147971			24.504
13	bedaq-20220929-A1-5		1.36	130064	143202			30.2953
14	bedaq-20220929-A1-6		1.35	285074	151381			62.9589
15	bedaq-20220929-A1-7		1.35	276894	139949			66.1542
16	bedaq-20220929-A1-8		1.35	316615	143979			73.5425
17	bedaq-20220929-A1-9		1.35	355081	144426			82.2379
18	bedaq-20220929-A1-10		1.36	240349	144882			55.4465
19	bedaq-20220929-A1-11		1.36	134343	145958			30.7028
20	bedaq-20220929-A2-1		1.36	1145	150428			0.1196
21	bedaq-20220929-A2-2		1.35	5146	150491			1.01033
22	bedaq-20220929-A2-3		1.36	26739	148776			5.88645
23	bedaq-20220929-A2-4		1.36	61805	148120			13.8449
24	bedaq-20220929-A2-5		1.36	70971	147683			15.9656
25	bedaq-20220929-A2-6		1.36	98571	145217			22.607
26	bedaq-20220929-A2-7		1.36	128498	154156			27.7928
27	bedaq-20220929-A2-8		1.36	123937	150486			27.4583
28	bedaq-20220929-A2-9		1.35	114722	144715			26.4253
29	bedaq-20220929-A2-10		1.36	73514	142832			17.1091
30	bedaq-20220929-A2-11		1.35	23493	135482			5.67448
31	bedaq-20220929-A3-1		1.36	2714	145582			0.48917
32	bedaq-20220929-A3-2		1.35	20687	149386			4.50447
33	bedaq-20220929-A3-3		1.36	70365	144461			16.1843
34	bedaq-20220929-A3-4		1.36	86463	142589			20.1813
35	bedaq-20220929-A3-5		1.36	140324	150049			31.1979
36	bedaq-20220929-A3-6		1.36	229793	149936			51.2139
37	bedaq-20220929-A3-7		1.35	286109	146253			65.4081
38	bedaq-20220929-A3-8		1.35	196924	167815			39.1807
39	bedaq-20220929-A3-9		1.36	299754	145873			68.713
40	bedaq-20220929-A3-10		1.35	221931	141232			52.5134
41	bedaq-20220929-A3-11		1.36	102922	147291			23.2766
42	bedaq-20220929-A4-1		1.35	3274	148452			0.60356
43	bedaq-20220929-A4-2		1.35	13871	151981			2.92267
44	bedaq-20220929-A4-3		1.36	40152	150915			8.77869
45	bedaq-20220929-A4-4		1.36	70534	147386			15.8989
46	bedaq-20220929-A4-5		1.36	70473	157044			14.8997
47	bedaq-20220929-A4-6		1.36	110187	150141			24.4534
48	bedaq-20220929-A4-7		1.35	150664	144246			34.86
49	bedaq-20220929-A4-8		1.36	161810	147894			36.5217
50	bedaq-20220929-A4-9		1.36	139046	145350			31.916
51	bedaq-20220929-A4-10		1.36	90256	145196			20.6917
52	bedaq-20220929-A4-11		1.36	34149	153486			7.31903
53	bedaq-20220929-A5-1		1.36	975	157875			0.07165
54	bedaq-20220929-A5-2		1.36	4347	152656			0.81876
55	bedaq-20220929-A5-3		1.36	17762	153544			3.74048
56	bedaq-20220929-A5-4		1.36	24725	156511			5.1575
57	bedaq-20220929-A5-5		1.36	39297	151303			8.56657
58	bedaq-20220929-A5-6		1.36	61928	145585			14.1165
59	bedaq-20220929-A5-7		1.36	66888	150250			14.7802
60	bedaq-20220929-A5-8		1.36	68243	150296			15.0777
61	bedaq-20220929-A5-9		1.36	60934	144736			13.97
62	bedaq-20220929-A5-10		1.36	36946	148338			8.2095
63	bedaq-20220929-A5-11		1.36	13765	153205			2.87504
64	bedaq-20220929-A6-1		1.36	1623	154985			0.21562
65	bedaq-20220929-A6-2		1.36	8747	158213			1.71693
66	bedaq-20220929-A6-3		1.36	50981	156810			10.7575
67	bedaq-20220929-A6-4		1.36	137603	155683			29.4783
68	bedaq-20220929-A6-5		1.36	196725	154335			42.5715
69	bedaq-20220929-A6-6		1.36	403872	151191			89.3644
70	bedaq-20220929-A6-7		1.36	382467	159968			79.9707
71	bedaq-20220929-A6-8		1.36	363593	152980			79.496
72	bedaq-20220929-A6-9		1.36	312679	161598			64.6932
73	bedaq-20220929-A6-10		1.36	202459	156513			43.2048
74	bedaq-20220929-A6-11		1.36	102131	159865			21.2693
75	bedaq-20220929-B1-1		1.36	2673	150989			0.4579
76	bedaq-20220929-B1-2		1.36	8183	154137			1.64346
77	bedaq-20220929-B1-3		1.36	36221	163041			7.30797
78	bedaq-20220929-B1-4		1.36	38228	167369			7.51737
79	bedaq-20220929-B1-5		1.36	55429	165629			11.0772
80	bedaq-20220929-B1-6		1.37	99612	154330			21.49
81	bedaq-20220929-B1-7		1.36	113939	149860			25.3382
82	bedaq-20220929-B1-8		1.36	118150	143094			27.5288
83	bedaq-20220929-B1-9		1.36	124855	155262			26.8076
84	bedaq-20220929-B1-10		1.36	100500	182983			18.2665
85	bedaq-20220929-B1-11		1.36	37143	166245			7.35035
86	bedaq-20220929-B2-1		1.36	4237	167960			0.70984
87	bedaq-20220929-B2-2		1.36	19975	161933			3.9976
88	bedaq-20220929-B2-3		1.36	52639	162070			10.7467
89	bedaq-20220929-B2-4		1.36	77632	163095			15.8126
90	bedaq-20220929-B2-5		1.36	96084	147435			21.6997
91	bedaq-20220929-B2-6		1.36	146505	164227			29.7537
92	bedaq-20220929-B2-7		1.36	196160	164708			39.767
93	bedaq-20220929-B2-8		1.37	203300	172053			39.454
94	bedaq-20220929-B2-9		1.36	179798	159826			37.5558
95	bedaq-20220929-B2-10		1.36	128600	166052			25.8123
96	bedaq-20220929-B2-11		1.36	51545	164388			10.3702
97	bedaq-20220929-B3-1		1.36	4258	167848			0.71458
98	bedaq-20220929-B3-2		1.36	16221	175056			2.96925
99	bedaq-20220929-B3-3		1.37	73920	180357			13.5966
100	bedaq-20220929-B3-4		1.36	93647	173934			17.9036
101	bedaq-20220929-B3-5		1.36	165267	179680			30.6817
102	bedaq-20220929-B3-6		1.36	254954	172589			49.3586
103	bedaq-20220929-B3-7		1.36	240679	165374			48.6257
104	bedaq-20220929-B3-8		1.36	299674	166991			59.9904
105	bedaq-20220929-B3-9		1.36	236429	173380			45.5528
106	bedaq-20220929-B3-10		1.36	157229	166638			31.4774
107	bedaq-20220929-B3-11		1.36	68309	175470			12.9076
108	bedaq-20220929-B4-1		1.36	3404	168591			0.54121
109	bedaq-20220929-B4-2		1.36	11405	183223			1.95021
110	bedaq-20220929-B4-3		1.36	32311	180619			5.85825
111	bedaq-20220929-B4-4		1.36	61974	191736			10.6942
112	bedaq-20220929-B4-5		1.37	61882	176764			11.5939
113	bedaq-20220929-B4-6		1.36	93467	177121			17.545
114	bedaq-20220929-B4-7		1.36	94238	161504			19.4148
115	bedaq-20220929-B4-8		1.36	99742	184087			18.0181
116	bedaq-20220929-B4-9		1.36	104323	184600			18.7991
117	bedaq-20220929-B4-10		1.36	62218	176755			11.6582
118	bedaq-20220929-B4-11		1.36	25190	180261			4.54665
119	bedaq-20220929-B5-1		1.36	8880	188412			1.44372
120	bedaq-20220929-B5-2		1.36	23541	181714			4.2051
121	bedaq-20220929-B5-3		1.36	72269	191682			12.4966
122	bedaq-20220929-B5-4		1.36	90827	182700			16.521
123	bedaq-20220929-B5-5		1.36	114449	184760			20.619
124	bedaq-20220929-B5-6		1.36	153207	184926			27.6224
125	bedaq-20220929-B5-7		1.36	155869	170897			30.423
126	bedaq-20220929-B5-8		1.36	155517	179911			28.8263
127	bedaq-20220929-B5-9		1.36	142322	179518			26.4271
128	bedaq-20220929-B5-10		1.36	96935	180645			17.8434
129	bedaq-20220929-B5-11		1.36	27328	161116			5.54762
130	bedaq-20220929-B6-1		1.36	4474	201117			0.60996
131	bedaq-20220929-B6-2		1.36	17583	203832			2.7548
132	bedaq-20220929-B6-3		1.36	55807	179182			10.2998
133	bedaq-20220929-B6-4		1.36	103563	194383			17.7151
134	bedaq-20220929-B6-5		1.36	154181	178375			28.8248
135	bedaq-20220929-B6-6		1.36	304049	181105			56.1141
136	bedaq-20220929-B6-7		1.36	285910	173034			55.2252
137	bedaq-20220929-B6-8		1.37	374860	173970			72.058
138	bedaq-20220929-B6-9		1.36	338372	172875			65.4437
139	bedaq-20220929-B6-10		1.36	261346	184277			47.3815
140	bedaq-20220929-B6-11		1.36	125079	185750			22.4258
141	bedaq-20220929-C1-1		1.36	1705	176303			0.18876
142	bedaq-20220929-C1-2		1.36	8701	178765			1.49549
143	bedaq-20220929-C1-3		1.37	23368	219314			3.43454
144	bedaq-20220929-C1-4		1.36	49727	184403			8.89973
145	bedaq-20220929-C1-5		1.37	57709	195502			9.75457
146	bedaq-20220929-C1-6		1.36	281367	181570			51.7845
147	bedaq-20220929-C1-7		1.36	335949	184575			60.8469
148	bedaq-20220929-C1-8		1.36	311179	199945			52.0084
149	bedaq-20220929-C1-9		1.36	228086	189514			40.1884
150	bedaq-20220929-C1-10		1.36	331847	192631			57.5832
151	bedaq-20220929-C1-11		1.36	143739	201426			23.7737
152	bedaq-20220929-C2-1		1.36	807	187984			0.00851
153	bedaq-20220929-C2-2		1.36	6366	189655			0.98927
154	bedaq-20220929-C2-3		1.36	29923	197490			4.94119
155	bedaq-20220929-C2-4		1.36	94684	183900			17.1151
156	bedaq-20220929-C2-5		1.37	162321	206587			26.1901
157	bedaq-20220929-C2-6		1.36	334536	179791			62.2063
158	bedaq-20220929-C2-7		1.36	359334	187139			64.1982
159	bedaq-20220929-C2-8		1.36	368988	184997			66.6916
160	bedaq-20220929-C2-9		1.36	308790	184088			56.0653
161	bedaq-20220929-C2-10		1.36	204733	183362			37.2743
162	bedaq-20220929-C2-11		1.36	108013	182343			19.7114
163	bedaq-20220929-C3-1		1.36	2145	198316			0.22708
164	bedaq-20220929-C3-2		1.36	9150	189723			1.48048
165	bedaq-20220929-C3-3		1.36	27111	193423			4.56073
166	bedaq-20220929-C3-4		1.36	51087	193844			8.69463
167	bedaq-20220929-C3-5		1.36	100293	192408			17.3289
168	bedaq-20220929-C3-6		1.36	106123	200338			17.6127
169	bedaq-20220929-C3-7		1.36	111583	181492			20.4635
170	bedaq-20220929-C3-8		1.36	80838	209909			12.7676
171	bedaq-20220929-C3-9		1.36	110638	195481			18.8275
172	bedaq-20220929-C3-10		1.36	55498	218597			8.37082
173	bedaq-20220929-C3-11		1.36	25624	190486			4.37163
174	bedaq-20220929-C4-1		1.36	548	186077
175	bedaq-20220929-C4-2		1.36	4753	202821			0.64989
176	bedaq-20220929-C4-3		1.36	28649	183703			5.08985
177	bedaq-20220929-C4-4		1.36	123433	188327			21.8242
178	bedaq-20220929-C4-5		1.36	199751	188830			35.307
179	bedaq-20220929-C4-6		1.36	546743	181290			100.909
180	bedaq-20220929-C4-7		1.36	645588	186367			115.926
181	bedaq-20220929-C4-8		1.36	543197	191654			94.8251
182	bedaq-20220929-C4-9		1.36	513665	190001			90.4437
183	bedaq-20220929-C4-10		1.37	422535	194038			72.8236
184	bedaq-20220929-C4-11		1.36	205672	192485			35.6645
185	bedaq-20220929-C5-1		1.36	1918	209765			0.17102
186	bedaq-20220929-C5-2		1.36	7061	191141			1.10237
187	bedaq-20220929-C5-3		1.36	23726	191340			4.01917
188	bedaq-20220929-C5-4		1.36	71219	199313			11.8366
189	bedaq-20220929-C5-5		1.36	107867	199111			18.0155
190	bedaq-20220929-C5-6		1.36	268686	206499			43.4591
191	bedaq-20220929-C5-7		1.36	241946	190303			42.4614
192	bedaq-20220929-C5-8		1.36	308973	195747			52.7493
193	bedaq-20220929-C5-9		1.36	241248	189823			42.446
194	bedaq-20220929-C5-10		1.36	181079	203070			29.7409
195	bedaq-20220929-C5-11		1.36	106480	217333			16.2798
196	bedaq-20220929-C6-1		1.36	2165	189232			0.248
197	bedaq-20220929-C6-2		1.36	10933	184076			1.85458
198	bedaq-20220929-C6-3		1.36	67843	200554			11.1985
199	bedaq-20220929-C6-4		1.36	121958	199171			20.3804
200	bedaq-20220929-C6-5		1.36	188355	193253			32.5199
201	bedaq-20220929-C6-6		1.36	352132	186743			63.0426
202	bedaq-20220929-C6-7		1.36	396517	189642			69.9185
203	bedaq-20220929-C6-8		1.36	353252	185717			63.5934
204	bedaq-20220929-C6-9		1.36	381766	193695			65.9009
205	bedaq-20220929-C6-10		1.36	302669	195655			51.6946
206	bedaq-20220929-C6-11		1.36	140474	185434			25.2458
207	bedaq-20220929-C6-12				1.16
208	bedaq-20220929-D1-1		1.34	3187	214803			0.3618
209	bedaq-20220929-D1-2		1.34	18625	178434			3.36194
210	bedaq-20220929-D1-3		1.34	49051	191730			8.4363
211	bedaq-20220929-D1-4		1.34	65242	175056			12.3515
212	bedaq-20220929-D1-5		1.34	112164	185345			20.1404
213	bedaq-20220929-D1-6		1.34	201632	190108			35.4001
214	bedaq-20220929-D1-7		1.34	191360	200243			31.8828
215	bedaq-20220929-D1-8		1.35	188985	192522			32.7536
216	bedaq-20220929-D1-9		1.35	153754	178873			28.6643
217	bedaq-20220929-D1-10		1.35	115684	182736			21.0753
218	bedaq-20220929-D1-11		1.35	40648	187237			7.13827
219	bedaq-20220929-D2-1		1.35	5861	188772			0.90486
220	bedaq-20220929-D2-2		1.35	31197	199210			5.11157
221	bedaq-20220929-D2-3		1.35	77995	185764			13.9319
222	bedaq-20220929-D2-4		1.35	141410	184399			25.5583
223	bedaq-20220929-D2-5		1.35	166988	181420			30.7038
224	bedaq-20220929-D2-6		1.35	260661	239452			36.3367
225	bedaq-20220929-D2-7		1.35	271790	189081			48.0248
226	bedaq-20220929-D2-8		1.35	273118	187302			48.72
227	bedaq-20220929-D2-9		1.35	267192	190966			46.7428
228	bedaq-20220929-D2-10		1.35	143519	176535			27.1031
229	bedaq-20220929-D2-11		1.34	83311	193230			14.3101
230	bedaq-20220929-D3-1		1.35	2727	188544			0.34927
231	bedaq-20220929-D3-2		1.35	14323	186334			2.44001
232	bedaq-20220929-D3-3		1.35	63064	211082			9.87462
233	bedaq-20220929-D3-4		1.35	101190	181658			18.5279
234	bedaq-20220929-D3-5		1.35	135896	170149			26.6244
235	bedaq-20220929-D3-6		1.35	211162	176915			39.8548
236	bedaq-20220929-D3-7		1.35	226748	183912			41.173
237	bedaq-20220929-D3-8		1.35	239904	179157			44.7296
238	bedaq-20220929-D3-9		1.35	230879	180196			42.793
239	bedaq-20220929-D3-10		1.35	176453	177422			33.1863
240	bedaq-20220929-D3-11		1.35	111274	178833			20.712
241	bedaq-20220929-D4-1		1.35	2095	190421			0.2333
242	bedaq-20220929-D4-2		1.35	7635	177996			1.30179
243	bedaq-20220929-D4-3		1.35	21459	181960			3.81594
244	bedaq-20220929-D4-4		1.35	31690	183586			5.64817
245	bedaq-20220929-D4-5		1.35	43191	186933			7.60588
246	bedaq-20220929-D4-6		1.35	74390	184392			13.3816
247	bedaq-20220929-D4-7		1.35	75031	181689			13.7008
248	bedaq-20220929-D4-8		1.35	68083	184908			12.2011
249	bedaq-20220929-D4-9		1.35	70517	182225			12.8303
250	bedaq-20220929-D4-10		1.35	48484	197244			8.10027
251	bedaq-20220929-D4-11		1.35	24072	179478			4.35841
252	bedaq-20220929-D5-1		1.35	3954	186663			0.5743
253	bedaq-20220929-D5-2		1.35	13765	218151			1.97871
254	bedaq-20220929-D5-3		1.35	63227	190741			10.9708
255	bedaq-20220929-D5-4		1.35	70411	181742			12.8452
256	bedaq-20220929-D5-5		1.35	95748	169392			18.803
257	bedaq-20220929-D5-6		1.35	157363	179612			29.2189
258	bedaq-20220929-D5-7		1.35	188935	171629			36.7476
259	bedaq-20220929-D5-8		1.35	299545	250905			39.8642
260	bedaq-20220929-D5-9		1.35	179407	173869			34.4364
261	bedaq-20220929-D5-10		1.35	183088	173774			35.1649
262	bedaq-20220929-D5-11		1.35	142815	192862			24.675
263	bedaq-20220929-D6-1		1.35	2428	176985			0.32425
264	bedaq-20220929-D6-2		1.35	2781	178622			0.38628
265	bedaq-20220929-D6-3		1.36	7698	198574			1.16344
266	bedaq-20220929-D6-4		1.35	12574	187025			2.11718
267	bedaq-20220929-D6-5		1.35	20318	179049			3.66673
268	bedaq-20220929-D6-6		1.35	45081	181222			8.19936
269	bedaq-20220929-D6-7		1.35	52639	176545			9.85454
270	bedaq-20220929-D6-8		1.35	41412	171439			7.95781
271	bedaq-20220929-D6-9		1.35	32148	181391			5.80263
272	bedaq-20220929-D6-10		1.35	43704	179828			8.00735
273	bedaq-20220929-D6-11		1.35	25796	211499			3.95113

## Sheet: DAS-drug
non - compartment model
Parameters	units	No1	No2	No3	No4	Mean	SD	RSD/%		control
AUC(0-t)	ug/L*h	6473.47	3745.41	3842.53	6940.99	5250.6	1693.23	32.2				Control	AUC(0-t)	AUC(0-ꝏ)	MRT(0-t)	MRT(0-∞)	t1/2z	Tmax	Vz/F	CLz/F	Cmax
AUC(0-∞)	ug/L*h	6821.87	3935.55	3994.34	7289.5	5510.31	1794.78	32.6				A1	6473.47	6821.87	10.7	13.487	11.98	2	50.683	2.932	770.248
R_AUC(t/∞)	%	94.9	95.2	96.2	95.2	95.375	0.568	0.6				A2	3745.41	3935.55	13.564	16.147	13.178	2	96.635	5.082	332.25
AUMC(0-t)	h*h*ug/L	69263.1	50804.2	38197.6	65138.4	55850.8	14180.4	25.4				A3	3842.53	3994.34	9.941	11.975	10.719	1	77.444	5.007	506.651
AUMC(0-∞)	h*h*ug/L	92009.3	63546.8	47832.1	87955.6	72836	20878.2	28.7				A4	6940.99	7289.5	9.385	12.066	12.108	3	47.937	2.744	949.283
MRT(0-t)	h	10.7	13.564	9.941	9.385	10.898	1.858	17				Mean	5250.6	5510.31	10.898	13.419	11.996	2	68.175	3.941	639.608
MRT(0-∞)	h	13.487	16.147	11.975	12.066	13.419	1.946	14.5				SD	1693.23	1794.78	1.858	1.946	1.007	0.816	23.176	1.277	273.93
VRT(0-t)	h^2	108.275	121.778	104.69	97.189	107.983	10.291	9.5
VRT(0-∞)	h^2	262.42	264.731	214.551	250.343	248.011	23.182	9.3
Lambda_z	1/h	0.058	0.053	0.065	0.057	0.058	0.005	8.6
C_last	ug/L	20.153	9.999	9.815	19.947	14.979	5.857	39.1
t1/2z	h	11.98	13.178	10.719	12.108	11.996	1.007	8.4
Tmax	h	2	2	1	3	2	0.816	40.8
Vz/F	L/kg	50.683	96.635	77.444	47.937	68.175	23.176	34
CLz/F	L/h/kg	2.932	5.082	5.007	2.744	3.941	1.277	32.4
Cmax	ug/L	770.248	332.25	506.651	949.283	639.608	273.93	42.8
non - compartment model
Parameters	units	No1	No2	No3	No4	Mean	SD	RSD/%		treated
AUC(0-t)	ug/L*h	12386.2	9088.73	16458.1	8671.96	11651.3	3609.65	31
AUC(0-∞)	ug/L*h	13016.3	9108.74	16508.3	8708.92	11835.6	3671.52	31				Carvedilol	AUC(0-t)	AUC(0-ꝏ)	MRT(0-t)	MRT(0-∞)	t1/2z	Tmax	Vz/F	CLz/F	Cmax
R_AUC(t/∞)	%	95.2	99.8	99.7	99.6	98.575	2.251	2.3				A1	12386.2	13016.3	11.211	13.774	11.198	6	12.414	0.768	1597.73
AUMC(0-t)	h*h*ug/L	138866	82247.2	173457	103097	124417	40193.3	32.3				A2	9088.73	9108.74	9.049	9.153	5.569	3	8.822	1.098	1189.69
AUMC(0-∞)	h*h*ug/L	179293	83368.4	176286	105191	136035	49046.1	36.1				A3	16458.1	16508.3	10.539	10.679	5.81	6	5.079	0.606	1918.49
MRT(0-t)	h	11.211	9.049	10.539	11.889	10.672	1.214	11.4				A4	8671.96	8708.92	11.889	12.079	6.003	6	9.946	1.148	1128.87
MRT(0-∞)	h	13.774	9.153	10.679	12.079	11.421	1.972	17.3				Mean	11651.3	11835.6	10.672	11.421	7.145	5.25	9.065	0.905	1458.7
VRT(0-t)	h^2	92.504	95.535	94.092	107.675	97.452	6.927	7.1				SD	3609.65	3671.52	1.214	1.972	2.708	1.5	3.052	0.261	370.537
VRT(0-∞)	h^2	229.81	100.306	100.389	116.007	136.628	62.558	45.8
Lambda_z	1/h	0.062	0.124	0.119	0.115	0.105	0.029	27.6
C_last	ug/L	38.995	2.49	5.985	4.266	12.934	17.432	134.8
t1/2z	h	11.198	5.569	5.81	6.003	7.145	2.708	37.9				Parameters		Bedaquiline	Bedaquiline + Carvedilol
Tmax	h	6	3	6	6	5.25	1.5	28.6
Vz/F	L/kg	12.414	8.822	5.079	9.946	9.065	3.052	33.7				AUC(0-t)	ug/L*h	5250.601±1693.228	11651.251±3609.654 *
CLz/F	L/h/kg	0.768	1.098	0.606	1.148	0.905	0.261	28.8				AUC(0-∞)	ug/L*h	5510.314±1794.78	11835.566±3671.518 *
Cmax	ug/L	1597.73	1189.69	1918.49	1128.87	1458.7	370.537	25.4				MRT(0-t)	h	10.898±1.858	10.672±1.214
												MRT(0-∞)	h	13.419±1.946	11.421±1.972
												t1/2z	h	11.996±1.007	7.145±2.708 *
												Tmax	h	2.000±0.816	5.250±1.500 **
												Vz/F	L/kg	68.175±23.176	9.065±3.052 ***
												CLz/F	L/h/kg	3.941±1.277	0.905±0.261 ***
												Cmax	ug/L	639.608±273.930	1458.696±370.537 *

## Sheet: SPSS-drug
ANOVA
		sum of squares	DOF	mean square	F	significance				ns	no statistical differences
AUC(0-t)	among groups	8.19366e+07	1	8.19366e+07	10.3087	0.0183505	*			*	P<0.05
	Intra-group	4.76899e+07	6	7.94831e+06						**	P<0.01
	total	1.29627e+08	7							***	P<0.005
AUC(0-∞)	among groups	8.00176e+07	1	8.00176e+07	9.58221	0.0212377	*
	Intra-group	5.01038e+07	6	8.35064e+06
	total	1.30121e+08	7
MRT(0-t)	among groups	0.1017	1	0.1017	0.0412991	0.845678
	Intra-group	14.7752	6	2.46253
	total	14.8769	7
MRT(0-∞)	among groups	7.98001	1	7.98001	2.07936	0.199393
	Intra-group	23.0263	6	3.83772
	total	31.0063	7
t1/2z	among groups	47.0693	1	47.0693	11.2796	0.0152576	*
	Intra-group	25.0376	6	4.17294
	total	72.1069	7
Tmax	among groups	21.125	1	21.125	14.4857	0.008905	**
	Intra-group	8.75	6	1.45833
	total	29.875	7
Vz/F	among groups	6987.87	1	6987.87	25.5752	0.00231711	***
	Intra-group	1639.37	6	273.229
	total	8627.24	7
CLz/F	among groups	18.4376	1	18.4376	21.7186	0.00346619	***
	Intra-group	5.09359	6	0.848932
	total	23.5312	7
Cmax	among groups	1.34181e+06	1	1.34181e+06	12.6386	0.0119982	*
	Intra-group	637007	6	106168
	total	1.97882e+06	7

## Sheet: DAS-metabolite
non - compartment model
Parameters	units	No1	No2	No3	No4	Mean	SD	RSD/%		Control
AUC(0-t)	ug/L*h	2428.42	760.55	924.882	2088.92	1550.69	831.877	53.6
AUC(0-∞)	ug/L*h	3766.42	894.13	1098.46	2776.78	2133.95	1376.9	64.5
R_AUC(t/∞)	%	64.5	85.1	84.2	75.2	77.25	9.604	12.4				Control	AUC(0-t)	AUC(0-∞)	MRT(0-t)	MRT(0-∞)	t1/2z	Tmax	Vz/F	CLz/F	Cmax
AUMC(0-t)	h*h*ug/L	52106.8	14284.7	17574.1	40658.4	31156	18242.2	58.6				A1	2428.42	3766.42	21.457	46.222	29.916	12	114.616	2.655	82.2379
AUMC(0-∞)	h*h*ug/L	174091	23788.9	29998.9	96078.3	80989.3	70160.5	86.6				A2	760.55	894.13	18.782	26.606	16.043	8	258.912	11.184	27.7928
MRT(0-t)	h	21.457	18.782	19.002	19.464	19.676	1.221	6.2				A3	924.882	1098.46	19.002	27.31	16.341	10	214.662	9.104	36.5217
MRT(0-∞)	h	46.222	26.606	27.31	34.601	33.685	9.106	27				A4	2088.92	2776.78	19.464	34.601	22.57	6	117.291	3.601	89.3644
VRT(0-t)	h^2	171.83	136.636	139.682	164.557	153.176	17.637	11.5				Mean	1550.69	2133.95	19.676	33.685	21.218	9	176.37	6.636	58.979
VRT(0-∞)	h^2	1885.92	544.788	573.283	1082.38	1021.59	626.917	61.4				SD	831.877	1376.9	1.221	9.106	6.533	2.582	72.073	4.157	31.311
Lambda_z	1/h	0.023	0.043	0.042	0.031	0.035	0.01	28.6
C_last	ug/L	30.994	5.77	7.361	21.12	16.311	11.971	73.4
t1/2z	h	29.916	16.043	16.341	22.57	21.218	6.533	30.8
Tmax	h	12	8	10	6	9	2.582	28.7
Vz/F	L/kg	114.616	258.912	214.662	117.291	176.37	72.073	40.9
CLz/F	L/h/kg	2.655	11.184	9.104	3.601	6.636	4.157	62.6
Cmax	ug/L	82.2379	27.7928	36.5217	89.3644	58.979	31.311	53.1
non - compartment model
Parameters	units	No1	No2	No3	No4	Mean	SD	RSD/%		treated
AUC(0-t)	ug/L*h	1548.97	1748.21	308.218	1348.95	1238.59	641.306	51.8
AUC(0-∞)	ug/L*h	2616.98	2426.74	541.606	1960.75	1886.52	938.032	49.7				Carvedilol	AUC(0-t)	AUC(0-∞)	MRT(0-t)	MRT(0-∞)	t1/2z	Tmax	Vz/F	CLz/F	Cmax
R_AUC(t/∞)	%	59.2	72	56.9	68.8	64.225	7.31	11.4				A1	1548.97	2616.98	20.938	50.369	31.222	8	172.16	3.821	60.8469
AUMC(0-t)	h*h*ug/L	32431.9	35492.4	3576.59	28199.1	24925	14543	58.3				A2	1748.21	2426.74	20.302	37.795	24.163	10	143.677	4.121	66.6916
AUMC(0-∞)	h*h*ug/L	131815	91719.2	15793.6	80736.8	80016	48114.7	60.1				A3	308.218	541.606	11.604	29.161	19.644	12	523.379	18.464	18.8275
MRT(0-t)	h	20.938	20.302	11.604	20.905	18.437	4.565	24.8				A4	1348.95	1960.75	20.905	41.176	26.246	10	193.159	5.1	52.7493
MRT(0-∞)	h	50.369	37.795	29.161	41.176	39.625	8.769	22.1				Mean	1238.59	1886.52	18.437	39.625	25.319	10	258.094	7.877	49.779
VRT(0-t)	h^2	283.478	168.3	40.814	171.56	166.038	99.178	59.7				SD	641.306	938.032	4.565	8.769	4.804	1.633	178.016	7.079	21.411
VRT(0-∞)	h^2	2252.46	1249.59	776.545	1471.7	1437.57	615.764	42.8
Lambda_z	1/h	0.022	0.029	0.035	0.026	0.028	0.005	17.9
C_last	ug/L	23.705	19.461	8.233	16.154	16.888	6.546	38.8
t1/2z	h	31.222	24.163	19.644	26.246	25.319	4.804	19			Parameters		Bedaquiline	Bedaquiline + Carvedilol
Tmax	h	8	10	12	10	10	1.633	16.3
Vz/F	L/kg	172.16	143.677	523.379	193.159	258.094	178.016	69			AUC(0-t)	ug/L*h	1550.693±831.877	1238.587±641.306
CLz/F	L/h/kg	3.821	4.121	18.464	5.1	7.877	7.079	89.9			AUC(0-∞)	ug/L*h	2133.946±1376.901	1886.518±938.032
Cmax	ug/L	60.8469	66.6916	18.8275	52.7493	49.779	21.411	43			MRT(0-t)	h	19.676±1.221	18.437±4.565
											MRT(0-∞)	h	33.685±9.106	39.625±8.769
											t1/2z	h	21.218±6.533	25.319±4.804
											Tmax	h	9.000±2.582	10.000±1.633
											Vz/F	L/kg	176.37±72.073	258.094±178.016
											CLz/F	L/h/kg	6.636±4.157	7.877±7.079
											Cmax	ug/L	58.979±31.311	49.779±21.411

## Sheet: SPSS-metabolite
	ANOVA
			sum of squares	DOF	mean square	F	significance
	AUC(0-t)	among groups	194821	1	194821	0.353162	0.574037
		Intra-group	3.30988e+06	6	551646
		total	3.5047e+06	7
	AUC(0-∞)	among groups	122441	1	122441	0.088222	0.776464
		Intra-group	8.32728e+06	6	1.38788e+06
		total	8.44972e+06	7
	MRT(0-t)	among groups	3.07024	1	3.07024	0.27501	0.618792
		Intra-group	66.9846	6	11.1641
		total	70.0548	7
	MRT(0-∞)	among groups	70.5791	1	70.5791	0.883248	0.383591
		Intra-group	479.452	6	79.9086
		total	550.031	7
	t1/2z	among groups	33.6405	1	33.6405	1.02305	0.350833
		Intra-group	197.296	6	32.8826
		total	230.936	7
	Tmax	among groups	2	1	2	0.428571	0.536963
		Intra-group	28	6	4.66667
		total	30	7
	Vz/F	among groups	13357.5	1	13357.5	0.724296	0.427392
		Intra-group	110652	6	18442
		total	124009	7
	CLz/F	among groups	3.07768	1	3.07768	0.0913304	0.772695
		Intra-group	202.19	6	33.6983
		total	205.268	7
	Cmax	among groups	169.295	1	169.295	0.235321	0.644808
		Intra-group	4316.52	6	719.419
		total	4485.81	7
